# Supplementary material for: Synthesis of bismuthanyl-substituted monomeric triel hydrides
Source: Royal Society of Chemistry journal article supplement (doi:10.1039/d4sc03926b), 2024-01-01
Supplement: d4sc03926b1.pdf [file d4sc03926b1.pdf]

# Supplementary Information

## Synthesis of Bismuthanyl-substituted monomeric Triel Hydrides

Robert Szlosek<sup>[a]</sup>, Christian Marquardt,<sup>[a]</sup> Oliver Hegen,<sup>[a]</sup> Gábor Balázs,<sup>[a]</sup> Christoph Riesinger<sup>[a]</sup>, Alexey Y. Timoshkin<sup>[b]</sup>, and Manfred Scheer<sup>[a]\*</sup>

<sup>[a]</sup> Department of Inorganic Chemistry, Universität Regensburg, 93053 Regensburg, Germany

<sup>[b]</sup> Institute of Chemistry, Universitetskaya nab. 7/9, 199034 St. Petersburg, Russia

\*Manfred.Scheer@ur.de

### Table of Contents

|                                                                                                                                                |    |
|------------------------------------------------------------------------------------------------------------------------------------------------|----|
| 1. General Information.....                                                                                                                    | 4  |
| a. Working Techniques .....                                                                                                                    | 4  |
| b. Spectroscopic Analysis .....                                                                                                                | 4  |
| 2. Experimental Details.....                                                                                                                   | 5  |
| a. Synthesis of $\text{KBi}(\text{SiMe}_3)_2(\text{THF})_{0.3}$ .....                                                                          | 5  |
| b. Synthesis of $\text{IME}_4 \cdot \text{BH}_3$ .....                                                                                         | 5  |
| c. Synthesis of $\text{DMAP} \cdot \text{BH}_3$ .....                                                                                          | 5  |
| d. Synthesis of $\text{DMAP} \cdot \text{BH}_2\text{I}$ .....                                                                                  | 6  |
| e. Synthesis of $\text{IME}_4 \cdot \text{BH}_2\text{I}$ .....                                                                                 | 6  |
| f. Synthesis of $\text{IDipp} \cdot \text{BH}_2\text{Bi}(\text{SiMe}_3)_2$ (1a) .....                                                          | 7  |
| g. Synthesis of $\text{IME}_4 \cdot \text{BH}_2\text{Bi}(\text{SiMe}_3)_2$ (1b).....                                                           | 7  |
| h. Synthesis of $\text{DMAP} \cdot \text{BH}_2\text{Bi}(\text{SiMe}_3)_2$ (1c) .....                                                           | 8  |
| i. Synthesis of $\text{IDipp} \cdot \text{GaH}_2\text{Bi}(\text{SiMe}_3)_2$ (2) .....                                                          | 9  |
| j. Desilylation attempts of $\text{IDipp} \cdot \text{BH}_2\text{Bi}(\text{SiMe}_3)_2$ with 1,4-benzoquinone/MeOH- <i>d</i> <sub>4</sub> ..... | 9  |
| 3. NMR Data.....                                                                                                                               | 12 |
| a. $\text{KBi}(\text{SiMe}_3)_2(\text{THF})_{0.3}$ .....                                                                                       | 12 |
| b. $\text{DMAP} \cdot \text{BH}_3$ .....                                                                                                       | 13 |
| c. $\text{IME}_4 \cdot \text{BH}_2\text{I}$ .....                                                                                              | 14 |
| d. $\text{DMAP} \cdot \text{BH}_2\text{I}$ .....                                                                                               | 16 |
| e. $\text{DMAP} \cdot \text{BH}_2\text{Bi}(\text{SiMe}_3)_2$ .....                                                                             | 17 |
| f. $\text{IDipp} \cdot \text{BH}_2\text{Bi}(\text{SiMe}_3)_2$ .....                                                                            | 20 |
| g. $\text{IME}_4 \cdot \text{BH}_2\text{Bi}(\text{SiMe}_3)_2$ .....                                                                            | 22 |

|    |                                                                             |    |
|----|-----------------------------------------------------------------------------|----|
| h. | Crude NMR spectra of desilylation attempt.....                              | 25 |
| i. | IDipp·GaH <sub>2</sub> Bi(SiMe <sub>3</sub> ) <sub>2</sub> .....            | 26 |
| 4. | Mass spectra.....                                                           | 28 |
| a. | IDipp·BH <sub>2</sub> Bi(SiMe <sub>3</sub> ) <sub>2</sub> .....             | 28 |
| b. | IMe <sub>4</sub> ·BH <sub>2</sub> Bi(SiMe <sub>3</sub> ) <sub>2</sub> ..... | 29 |
| c. | IDipp·GaH <sub>2</sub> Bi(SiMe <sub>3</sub> ) <sub>2</sub> .....            | 30 |
| 5. | Crystallographic Data.....                                                  | 31 |
| a. | Crystal structures.....                                                     | 34 |
| 6. | Computational Details.....                                                  | 37 |
| a. | General Information.....                                                    | 37 |
| b. | Molecular Properties and Thermodynamics.....                                | 37 |
| c. | Frontier Molecular Orbitals.....                                            | 40 |
| d. | Cartesian Coordinates of optimized Structures.....                          | 42 |
| 7. | References.....                                                             | 49 |

### **Author contributions**

R. Szlosek – performing experimental work (incl. reproductions and analytical data of **1b** and **1c**), writing of the original draft, acquisition (**1a**, **2**) and refinement of (**2**) of X-ray data.

Ch. Marquardt – original preparation of **1c** & acquisition/refinement of X-ray data for **1c**.

O. Hegen – original preparation of **1b** & acquisition/refinement of X-ray data for **1b**.

G. Balázs – conceptualization, project management.

Ch. Riesinger – refinement of X-ray data for **1a**.

A. Y. Timoshkin – conceptualization, quantum chemical calculations, funding, project management.

M. Scheer – writing of the original draft, conceptualization, funding, project management.

# 1. General Information

## a. Working Techniques

All working steps were carried out under argon inert gas atmosphere using standard Schlenk and glove-box techniques under exclusion of light due to the sensitivity of the reagents and products. All glassware was dried in an oven at 150 °C and pre-conditioned in high vacuum ( $< 10^{-3}$  mbar, 650 °C) shortly before use. Traces of H<sub>2</sub>O and O<sub>2</sub> were removed from argon gas by passing it through a BASF R 3-11 (CuO/MgSiO<sub>3</sub>) catalyst, concentrated H<sub>2</sub>SO<sub>4</sub>, Orange Gel and Sicapent® supported on pumice stone. Prior to use, solvents were purified using an MBraun SPS-800 solvent purification system, degassed at room temperature, and stored over molecular sieves for at least 48 hours. C<sub>6</sub>D<sub>6</sub> was dried over Na/K, distilled, degassed at room temperature, and stored over molecular sieves (4 Å). CD<sub>3</sub>CN was dried repeatedly over molecular sieves (3 Å). Elemental Analysis (CHNS) was performed by the in-house facility. Mass spectra were recorded on a Jeol AccuTOF GCX mass spectrometer (LIFDI-MS) mass spectrometer by the in-house facility.

IDipp·GaH<sub>2</sub>(OTf),<sup>[1]</sup> IDipp·BH<sub>2</sub>I,<sup>[1]</sup> IMe<sub>4</sub>·BH<sub>3</sub>,<sup>[2]</sup> and Bi(SiMe<sub>3</sub>)<sub>3</sub><sup>[3]</sup> were prepared according to literature procedures. BH<sub>3</sub>·SMe<sub>2</sub>/ BH<sub>3</sub>·THF was purchased from ABCR and used as received. 1,4-benzoquinone was freshly sublimed prior to use. Preparation involving KBi(SiMe<sub>3</sub>)<sub>2</sub>(THF)<sub>0.3</sub> or the bismuth containing products were conducted under exclusion of light.

## b. Spectroscopic Analysis

All NMR spectra were recorded on a BRUKER Avance 400 (frequencies: <sup>1</sup>H: 400.13 MHz, <sup>11</sup>B: 128.43 MHz, <sup>13</sup>C: 100.66 MHz, <sup>29</sup>Si: 79.50) or Avance 300 (<sup>1</sup>H: 300.13 MHz, <sup>13</sup>C: 75.47 MHz) spectrometers. Substances of reference are Si(CH<sub>3</sub>)<sub>4</sub> (<sup>1</sup>H, <sup>13</sup>C, <sup>29</sup>Si) and BF<sub>3</sub>·Et<sub>2</sub>O (<sup>11</sup>B). Chemical shifts  $\delta$  are presented in ppm referring to the external standards and coupling constants  $J$  are given in Hz without consideration of absolute signs.

## 2. Experimental Details

### a. Synthesis of $\text{KBi}(\text{SiMe}_3)_2(\text{THF})_{0.3}$

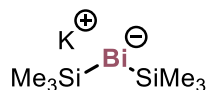

A round-bottom flask was charged with  $\text{Bi}(\text{SiMe}_3)_3$  (18.0 g, 42.0 mmol) and the compound dissolved in tetrahydrofuran (10 mL). The solution was cooled to  $-65\text{ }^\circ\text{C}$  and solid  $\text{KO}^t\text{Bu}$  was added (4.8 g, 42.0 mmol). After stirring at room temperature for 1.5 hours, all volatiles were removed *in vacuo*, yielding a brown-greenish crude product. The solid product was transferred onto a glass frit and washed three times with 30 mL of *n*-pentane each. The product was then dried *in vacuo* (16.8 g, 96%). According to  $^1\text{H}$  NMR spectroscopy (*vide infra*), the content of tetrahydrofuran in the final product was determined.

$^1\text{H}$  NMR (300.13 MHz,  $\text{CD}_3\text{CN}$ , 298 K): 0.63 (s,  $\text{Si}(\text{CH}_3)_3$ ).

$^{13}\text{C}\{^1\text{H}\}$  NMR (75.47 MHz,  $\text{CD}_3\text{CN}$ , 298 K): 12.1 (s).

### b. Synthesis of $\text{IME}_4\cdot\text{BH}_3$

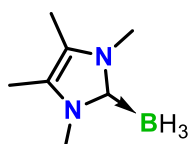

A Schlenk tube was charged with  $\text{IME}_4$  (1.27 g, 10.3 mmol) and the compound dissolved in toluene (10 mL). After cooling the solution to  $-40\text{ }^\circ\text{C}$ , neat  $\text{BH}_3\cdot\text{SMe}_2$  (1.45 mL, excess) was added *via* syringe. The mixture was stirred overnight at room temperature and then all volatiles were removed *in vacuo*, yielding  $\text{IME}_4\cdot\text{BH}_3$  as a white powder (1.24 g, 87%).

$^1\text{H}$  NMR (400.30 MHz,  $\text{C}_6\text{D}_6$ , 298 K): 1.20 (s, 6 H,  $2 \times \text{CH}_3$ ), 2.03 (q, broad, 3 H,  $\text{BH}_3$ ,  $^1J_{\text{HB}} = 87\text{ Hz}$ ), 3.13 (s, 6 H,  $2 \times \text{NCH}_3$ ).

$^{11}\text{B}\{^1\text{H}\}$  NMR (128.43 MHz,  $\text{C}_6\text{D}_6$ , 298 K): -35.8 (s, broad).

$^{11}\text{B}$  NMR (128.43 MHz,  $\text{C}_6\text{D}_6$ , 298 K): -35.8 (q, broad,  $^1J_{\text{HB}} = 87\text{ Hz}$ ).

The NMR data are consistent with the literature values.<sup>[2]</sup>

### c. Synthesis of $\text{DMAP}\cdot\text{BH}_3$

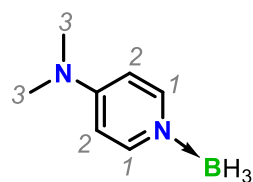

$\text{BH}_3\cdot\text{THF}$  (5 mL, 1.0 M in THF, 5.0 mmol) was added to a solution of DMAP (610 mg, 5.0 mmol) in toluene (8 mL), resulting in an immediate precipitation of a white solid. All volatiles are then removed *in vacuo* and the product dried under reduced pressure. The residue is washed twice with *n*-hexane (10 mL each) and dried under reduced pressure (355 mg, 52%).

$^1\text{H}$  NMR (400.30 MHz,  $\text{C}_6\text{D}_6$ , 298 K): 1.89 (s, 6 H,  $\text{C}3\text{H}$ ), 3.63 (q, 3 H,  $\text{BH}_3$ ,  $^1J_{\text{HB}} = 95\text{ Hz}$ ), 5.49 (m, 2 H,  $\text{C}2\text{H}$ ), 8.04 (m, 2 H,  $\text{C}1\text{H}$ ).

$^{11}\text{B}\{^1\text{H}\}$  NMR (128.43 MHz,  $\text{C}_6\text{D}_6$ , 298 K): -12.2 (s, broad).

$^{11}\text{B}$  NMR (128.43 MHz,  $\text{C}_6\text{D}_6$ , 298 K): -12.2 (q, broad,  $^1J_{\text{HB}} = 95$  Hz).

The NMR data are consistent with the literature values.<sup>[4]</sup>

#### d. Synthesis of DMAP·BH<sub>2</sub>I

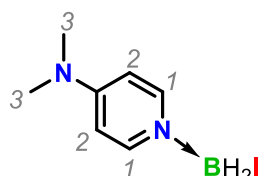

Solid I<sub>2</sub> (250 mg, 0.98 mmol) was slowly added to a solution of BH<sub>3</sub>·DMAP (272 mg, 2.0 mmol) in benzene (5 mL, gas evolution and precipitation of the product could be observed). After stirring for two hours at room temperature, all volatiles are removed *in vacuo* in the residue is washed with *n*-hexane (10 mL each). After drying under reduced pressure, the product is obtained as a white solid (425 mg, 81%).

$^1\text{H}$  NMR (400.30 MHz,  $\text{CD}_2\text{Cl}_2$ , 298 K): 3.04 (s, 6 H, C3H), 3.54 (q, 2 H, BH<sub>2</sub>,  $^1J_{\text{HB}} \approx 130$  Hz), 6.52 (m, 2 H, C2H), 8.06 (m, 2 H, C1H).

$^{11}\text{B}\{^1\text{H}\}$  NMR (128.43 MHz,  $\text{CD}_2\text{Cl}_2$ , 298 K): -11.7 (s, broad).

$^{11}\text{B}$  NMR (128.43 MHz,  $\text{CD}_2\text{Cl}_2$ , 298 K): -11.7 (t, broad,  $^1J_{\text{HB}} = 130$  Hz).

**Elemental Analysis** ( $\text{C}_7\text{H}_{12}\text{BIN}_2$ ) [%]: calc. C 32.10, H 4.62, N 10.70; found C 32.82, H 4.55, N 10.83.

#### e. Synthesis of IMe<sub>4</sub>·BH<sub>2</sub>I

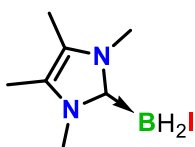

A Schlenk tube was charged with IMe<sub>4</sub>·BH<sub>3</sub> (272 mg, 1.97 mmol) and the solid dissolved in benzene (5 mL). Then, a solution of I<sub>2</sub> (243 mg, 0.94 mmol) in benzene was added under cooling with a water bath (room temperature) and the reaction mixture stirred overnight at room temperature. Subsequently, all volatiles were removed *in vacuo*, yielding a slightly yellowish powder (511 mg, 97%).

$^1\text{H}$  NMR (400.30 MHz,  $\text{CD}_2\text{Cl}_2$ , 298 K): 1.11 (s, 6 H, 2 × CH<sub>3</sub>), 3.02 (s, 6 H, 2 × NCH<sub>3</sub>), 3.10 (m, broad, 2 H, BH<sub>2</sub>).

$^{11}\text{B}\{^1\text{H}\}$  NMR (128.43 MHz,  $\text{CD}_2\text{Cl}_2$ , 298 K): -30.5 (s, broad).

$^{11}\text{B}$  NMR (128.43 MHz,  $\text{CD}_2\text{Cl}_2$ , 298 K): -30.5 (t, broad,  $^1J_{\text{HB}} = 102$  Hz).

**Elemental Analysis** ( $\text{C}_7\text{H}_{14}\text{BIN}_2$ ) [%]: calc. C 31.86, H 5.35, N 10.61; found C 32.76, H 5.21, N 10.41.

## f. Synthesis of IDipp·BH<sub>2</sub>Bi(SiMe<sub>3</sub>)<sub>2</sub> (1a)

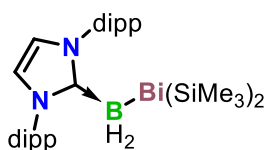

IDipp·BH<sub>2</sub>I (212 mg, 0.4 mmol) was dissolved in tetrahydrofuran (5 mL) and cooled to -80 °C. Then, solid KBi(SiMe<sub>3</sub>)<sub>2</sub>(THF)<sub>0.3</sub> (250 mg, 0.6 mmol) was added. The solution was allowed to reach room temperature over 18 hours and the formation of a black suspension was observed. All volatiles were subsequently removed *in vacuo* and the residue suspended in toluene (8 mL). The solution was filtered through a P4 glass frit covered with Celite and all volatiles removed *in vacuo*, yielding IDipp·BH<sub>2</sub>Bi(SiMe<sub>3</sub>)<sub>2</sub> as a black powder (169 mg, 56%).

**<sup>1</sup>H NMR (400.30 MHz, C<sub>6</sub>D<sub>6</sub>, 298 K):** 0.53 (s, 18 H, 2 × Si(CH<sub>3</sub>)<sub>3</sub>, <sup>2</sup>J<sub>H<sub>Si</sub></sub> = 6.78 Hz), 1.02 (d, 12 H, 4 × <sup>i</sup>Pr-CH<sub>3</sub>, <sup>3</sup>J<sub>HH</sub> = 6.92 Hz), 1.47 (d, 12 H, 4 × <sup>i</sup>Pr-CH<sub>3</sub>, <sup>3</sup>J<sub>HH</sub> = 6.92 Hz), 2.24 (q, broad, 2 H, BH<sub>2</sub>, <sup>1</sup>J<sub>HB</sub> ≈ 100 Hz), 2.28 (sep, 4 H, 4 × <sup>i</sup>Pr-CH, <sup>3</sup>J<sub>HH</sub> = 6.92 Hz), 6.34 (s, 2 H, NCHCHN), 7.14 (d, 4 H, 4 × aryl-C<sub>meta</sub>H, <sup>3</sup>J<sub>HH</sub> = 7.66 Hz), 7.25 (t, 2 H, 2 × aryl-C<sub>para</sub>H, <sup>3</sup>J<sub>HH</sub> = 7.66 Hz).

**<sup>13</sup>C{<sup>1</sup>H} NMR (100.66 MHz, C<sub>6</sub>D<sub>6</sub>, 298 K):** 5.1 (s, <sup>29</sup>Si satellite peaks with <sup>1</sup>J<sub>SiC</sub> = 41 Hz, Si(CH<sub>3</sub>)<sub>3</sub>), 23.3 (s, <sup>i</sup>Pr-CH<sub>3</sub>), 25.4 (s, <sup>i</sup>Pr-CH<sub>3</sub>), 28.7 (s, CH(CH<sub>3</sub>)<sub>2</sub>), 121.7 (s, Ar), 124.5 (s, Ar), 130.1 (s, NCH), 134.3 (s, Ar), 145.4 (s, Ar).

**<sup>11</sup>B{<sup>1</sup>H} NMR (128.43 MHz, C<sub>6</sub>D<sub>6</sub>, 298 K):** -42.1 (s, broad).

**<sup>11</sup>B NMR (128.43 MHz, C<sub>6</sub>D<sub>6</sub>, 298 K):** -42.1 (t, very broad, <sup>1</sup>J<sub>HB</sub> ≈ 100 Hz).

**<sup>1</sup>H, <sup>29</sup>Si HMBC (F2: 400.13 MHz F1: 79.50 MHz, C<sub>6</sub>D<sub>6</sub>, 298 K):** 0.52 ppm/-32.2 ppm (s, Si(CH<sub>3</sub>)<sub>3</sub>).

**LIFDI-MS (m/z):** 756.44 ([M]<sup>+</sup> 89%), 389.31 ([IDipp-H]<sup>+</sup>, 100%).

**Elemental Analysis (C<sub>33</sub>H<sub>56</sub>BBiN<sub>2</sub>Si<sub>2</sub>+ 0.1 Bi) [%]:** calc. C 50.97, H 7.26, N 3.60; found C 50.37, H 7.07, N 3.55. Elemental bismuth results from sample decomposition at room temperature.

## g. Synthesis of IMe<sub>4</sub>·BH<sub>2</sub>Bi(SiMe<sub>3</sub>)<sub>2</sub> (1b)

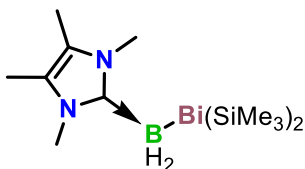

IMe<sub>4</sub>·BH<sub>2</sub>I (40 mg, 0.15 mmol) was dissolved in tetrahydrofuran (5 mL) and cooled to -80 °C. Then, solid KBi(SiMe<sub>3</sub>)<sub>2</sub>(THF)<sub>0.3</sub> (94 mg, 0.23 mmol) was added. The solution was allowed to reach room temperature over 18 hours and the formation of a black precipitate was observed. All volatiles were subsequently removed *in vacuo* and the residue suspended in *n*-hexane (10 mL). The solution was filtered through a P4 glass frit covered with Celite. The black-brown solution was collected, and all volatiles were removed *in vacuo*, yielding the product as a black-brown powder (61 mg, 83%). Single crystals suitable for X-ray structure determination were obtained by storing a saturated solution of IMe<sub>4</sub>·BH<sub>2</sub>Bi(SiMe<sub>3</sub>)<sub>2</sub> in *n*-hexane at -30 °C overnight.

**<sup>1</sup>H NMR (400.30 MHz, C<sub>6</sub>D<sub>6</sub>, 298 K):** 0.81 (s, 18 H, 2 × Si(CH<sub>3</sub>)<sub>3</sub>, <sup>2</sup>J<sub>H<sub>Si</sub></sub> = 6.73 Hz), 1.09 (s, 6 H, 2 × C(CH<sub>3</sub>)), 2.43 (q, very broad, 2 H, BH<sub>2</sub>, <sup>1</sup>J<sub>HB</sub> ≈ 107 Hz), 2.90 (s, 6 H, 2 × N(CH<sub>3</sub>)).

$^{13}\text{C}\{^1\text{H}\}$  NMR (100.66 MHz,  $\text{C}_6\text{D}_6$ , 298 K): 6.5 (s,  $\text{Si}(\text{CH}_3)_3$ ), 7.8 (s,  $\text{C}(\text{CH}_3)$ ), 32.0 (s,  $\text{C}(\text{CH}_3)$ ), 122.6 (s,  $\text{N}(\text{CH}_3)$ ).

$^{11}\text{B}\{^1\text{H}\}$  NMR (128.43 MHz,  $\text{C}_6\text{D}_6$ , 298 K): -39.5 (s, broad).

$^{11}\text{B}$  NMR (128.43 MHz,  $\text{C}_6\text{D}_6$ , 298 K): -39.5 (t, broad,  $^1J_{\text{HB}} = 107$  Hz).

$^1\text{H}$ ,  $^{29}\text{Si}$  HMBC (F2: 400.13 MHz F1: 79.50 MHz,  $\text{C}_6\text{D}_6$ , 298 K): 0.92 ppm/-33.7 ppm (s,  $\text{Si}(\text{CH}_3)_3$ ).

LIFDI-MS ( $m/z$ ): 492.20 ( $[\text{M}]^+$ , 10%), 261.20 ( $[(\text{IMe}_4)_2\text{BH}_2]^+$ , 40%), 247.20 ( $[(\text{IMe}_4)_2\text{-H}]^+$ , 100%).

Elemental Analysis ( $\text{C}_{13}\text{H}_{32}\text{BBiN}_2\text{Si}_2$ ) [%]: calc. C 31.69, H 6.55, N 5.69; found C 31.61, H 6.24, N 5.66.

#### h. Synthesis of DMAP· $\text{BH}_2\text{Bi}(\text{SiMe}_3)_2$ (**1c**)

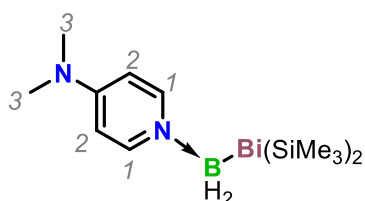

DMAP· $\text{BH}_2\text{I}$  (39 mg, 0.15 mmol) was dissolved in toluene (5 mL) and cooled to  $-80$  °C. Then, solid  $\text{KBi}(\text{SiMe}_3)_2(\text{THF})_{0.3}$  (75 mg, 0.18 mmol) was added to the solution. The mixture was stirred overnight in the cooling bath. Afterwards, the suspension was filtered through a P3 glass frit covered with Celite and the volatiles removed *in vacuo*, yielding DMAP· $\text{BH}_2\text{Bi}(\text{SiMe}_3)_2$  as a brown, extremely electrostatic solid (10 mg, 13%).

$^1\text{H}$  NMR (400.30 MHz,  $\text{C}_6\text{D}_6$ , 298 K): 0.95 (s, 18 H,  $2 \times \text{Si}(\text{CH}_3)_3$ ,  $^2J_{\text{HSi}} = 6.98$  Hz), 1.97 (s, 6 H,  $\text{C}_3\text{H}$ ), 4.74 (q, 2 H,  $^1J_{\text{BH}} \approx 120$  Hz,  $\text{BH}_2$ ), 5.50 (m, 2 H,  $\text{C}_2\text{H}$ ), 8.00 (m, 2 H,  $\text{C}_1\text{H}$ ).

$^{13}\text{C}\{^1\text{H}\}$  NMR (100.66 MHz,  $\text{C}_6\text{D}_6$ , 298 K): 6.2 (s,  $^{29}\text{Si}$  satellite peaks with  $^1J_{\text{SiC}} = 41$  Hz,  $\text{Si}(\text{CH}_3)_3$ ), 38.5 (s,  $\text{C}_3$ ), 106.7 (s,  $\text{C}_2$ ), 145.8 (s,  $\text{C}_1$ ), 153.6 (s,  $\text{C}(\text{NMe}_2)$ ).

$^{11}\text{B}\{^1\text{H}\}$  NMR (128.43 MHz,  $\text{C}_6\text{D}_6$ , 298 K): -15.2 (s, broad).

$^{11}\text{B}$  NMR (128.43 MHz,  $\text{C}_6\text{D}_6$ , 298 K): -15.2 (t, very broad,  $^1J_{\text{HB}} \approx 120$  Hz).

$^1\text{H}$ ,  $^{29}\text{Si}$  HMBC (F2: 400.13 MHz F1: 79.50 MHz,  $\text{C}_6\text{D}_6$ , 298 K): 0.96 ppm/-29.8 ppm (s,  $\text{Si}(\text{CH}_3)_3$ ).

LIFDI-MS ( $m/z$ ): could not be performed due to the too fast decomposition of the sample.

Elemental Analysis ( $\text{C}_{13}\text{H}_{30}\text{BBiN}_2\text{Si}_2$ ) [%]: could not be performed, as it was not possible to prepare an analytically clean sample of **1c** due to its extreme sensitivity and electrostatic nature.



### i. Synthesis of IDipp-GaH<sub>2</sub>Bi(SiMe<sub>3</sub>)<sub>2</sub> (2)

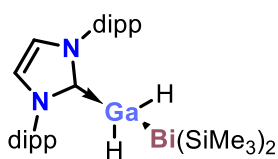

IDipp-GaH<sub>2</sub>(OTf) (91 mg, 0.15 mmol) was dissolved in tetrahydrofuran (5 mL) and cooled to -80 °C. Then, solid KBi(SiMe<sub>3</sub>)<sub>2</sub>(THF)<sub>0.3</sub> (112 mg, 0.27 mmol) was added in one portion. The solution was allowed to reach room temperature over 18 hours and the formation of a black precipitate was observed. All volatiles were subsequently removed *in vacuo* and the residue suspended in *n*-hexane (10 mL). The solution was filtered through a P4 glass frit covered with Celite. After removing the solvent *in vacuo*, IDipp-GaH<sub>2</sub>Bi(SiMe<sub>3</sub>)<sub>2</sub> could be obtained as a black powder (19 mg, 16%). Single crystals of **2** suitable for X-ray structure determination could be grown by slow evaporation of a solution of **2** in *n*-pentane at -80 °C under reduced pressure.

**<sup>1</sup>H NMR (300.13 MHz, C<sub>6</sub>D<sub>6</sub>, 298 K):** 0.70 (s, 18 H, 2 × Si(CH<sub>3</sub>)<sub>3</sub>, <sup>2</sup>J<sub>H<sub>Si</sub></sub> = 7.15 Hz), 0.98 (d, 12 H, 4 × <sup>i</sup>Pr-CH<sub>3</sub>, <sup>3</sup>J<sub>HH</sub> = 6.89 Hz), 1.44 (d, 12 H, 4 × <sup>i</sup>Pr-CH<sub>3</sub>, <sup>3</sup>J<sub>HH</sub> = 6.89 Hz), 2.69 (sep, 4 H, 4 × <sup>i</sup>Pr-CH, <sup>3</sup>J<sub>HH</sub> = 6.89 Hz), 4.97 (s, broad, 2 H, GaH<sub>2</sub>), 6.43 (s, 2 H, NCHCHN), 7.10 (d, superimposed, 4 H, 4 × aryl-C<sub>meta</sub>H, <sup>3</sup>J<sub>HH</sub> = 7.13 Hz), 7.25 (dd, 2 H, 2 × aryl-C<sub>para</sub>H, <sup>3</sup>J<sub>HH</sub> = 7.18 Hz, <sup>3</sup>J<sub>HH</sub> = 8.56 Hz).

**<sup>13</sup>C{<sup>1</sup>H} NMR (100.66 MHz, C<sub>6</sub>D<sub>6</sub>, 298 K):** 6.0 (s, <sup>29</sup>Si satellite peaks with <sup>1</sup>J<sub>SiC</sub> = 42 Hz, Si(CH<sub>3</sub>)<sub>3</sub>), 23.8 (s, <sup>i</sup>Pr-CH<sub>3</sub>), 25.4 (s, <sup>i</sup>Pr-CH<sub>3</sub>), 29.1 (s, CH(CH<sub>3</sub>)<sub>2</sub>), 124.1 (s, Ar), 124.4 (s, Ar), 130.7 (s, NCH), 135.2 (s, Ar), 145.5 (s, Ar).

**<sup>1</sup>H, <sup>29</sup>Si HMBC (F2: 400.13 MHz F1: 79.50 MHz, C<sub>6</sub>D<sub>6</sub>, 298 K):** 0.70 ppm/-37.7 ppm (s, Si(CH<sub>3</sub>)<sub>3</sub>).

**LIFDI-MS (m/z):** 814.34 ([M]<sup>+</sup>, 46%), 459.24 ([IDipp-GaH<sub>2</sub>]<sup>+</sup>, 100%), 389.31 ([IDipp-H]<sup>+</sup>, 31%).

**Elemental Analysis (C<sub>33</sub>H<sub>56</sub>GaBiN<sub>2</sub>Si<sub>2</sub>) [%]:** calc. C 48.59, H 6.92, N 3.43; found C 48.56, H 6.89, N 3.27.

### j. Desilylation attempts of IDipp-BH<sub>2</sub>Bi(SiMe<sub>3</sub>)<sub>2</sub> with 1,4-benzoquinone/MeOH-*d*<sub>4</sub>

*Note: this experiment was conducted under exclusion of light to avoid decomposition of any forming Bi-D/Bi-H containing species.*

A J.-Young tube was charged with IDipp-BH<sub>2</sub>Bi(SiMe<sub>3</sub>)<sub>2</sub> (83 mg, 0.12 mmol) and cooled to -80 °C. Then, a cold (-80 °C) solution of 1,4-benzoquinone (12 mg, 0.12 mmol) in 0.6 mL THF and 0.1 mL MeOH-*d*<sub>4</sub> was added to the tube. After vigorous shaking, the sample was submitted to variable-temperature NMR experiments. At *T* < 0 °C, no reaction was observed. Thus, the sample was warmed to room temperature and the NMR spectra were recorded subsequently (see below).

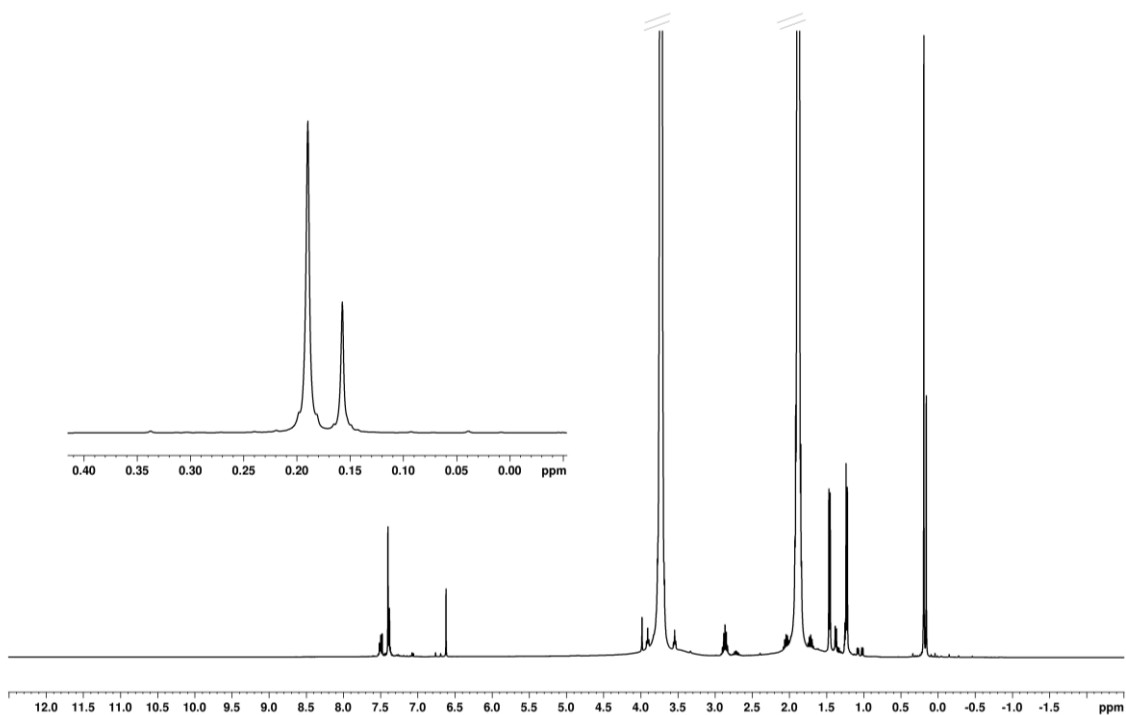

Figure S1:  $^1\text{H}$  NMR spectrum of the reaction mixture of  $\text{IDipp}\cdot\text{BH}_2\text{Bi}(\text{SiMe}_3)_2$  with 1,4-benzoquinone and  $\text{MeOH-}d_4$  (298 K; truncated signals correspond to tetrahydrofuran). The zoomed region shows a second resonance of  $\{\text{SiMe}_3\}$  groups.

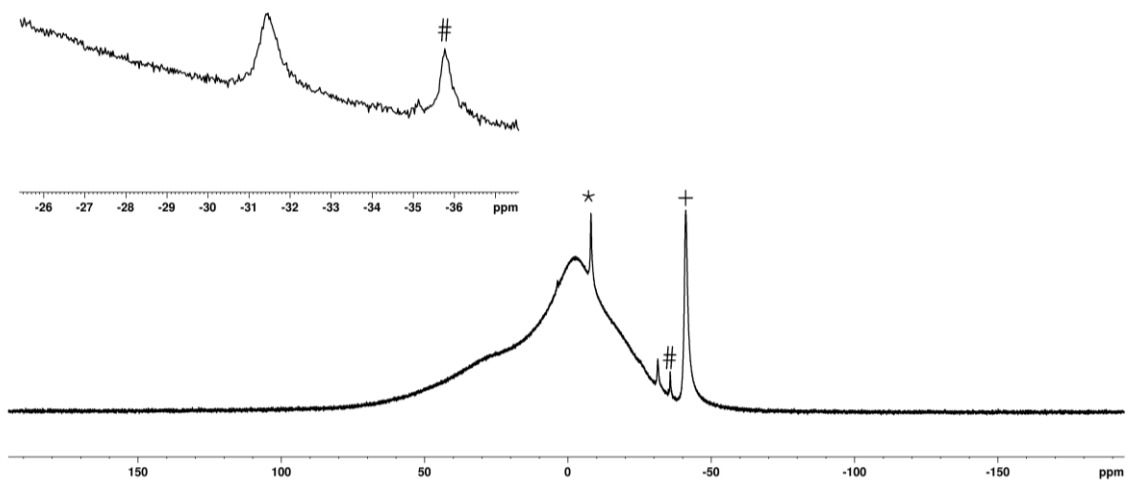

Figure S2:  $^{11}\text{B}\{^1\text{H}\}$  NMR spectrum of the reaction mixture of  $\text{IDipp}\cdot\text{BH}_2\text{Bi}(\text{SiMe}_3)_2$  with 1,4-benzoquinone and  $\text{MeOH-}d_4$  (298 K, \* =  $\text{IDipp}\cdot\text{BH}_2\text{OMe}$ , # =  $\text{IDipp}\cdot\text{BH}_3$ , + = starting material).

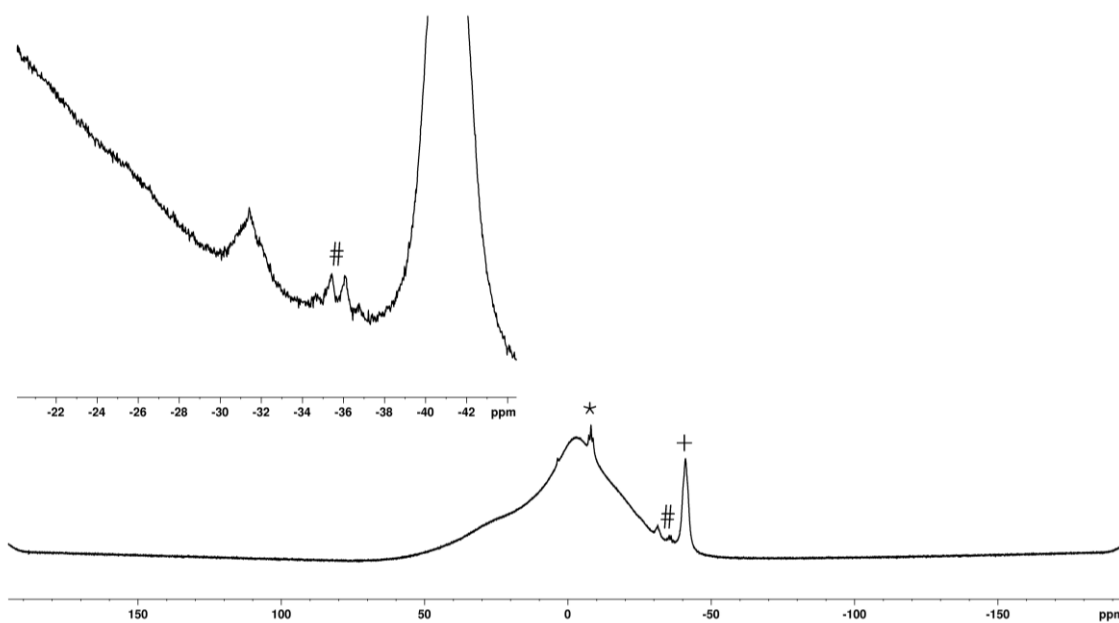

Figure S3:  $^{11}\text{B}$  NMR spectrum of the reaction mixture of  $\text{IDipp}\cdot\text{BH}_2\text{Bi}(\text{SiMe}_3)_2$  with 1,4-benzoquinone and  $\text{MeOH-}d_4$  (298 K, \* =  $\text{IDipp}\cdot\text{BH}_2\text{OMe}$ , # =  $\text{IDipp}\cdot\text{BH}_3$ , + = starting material).

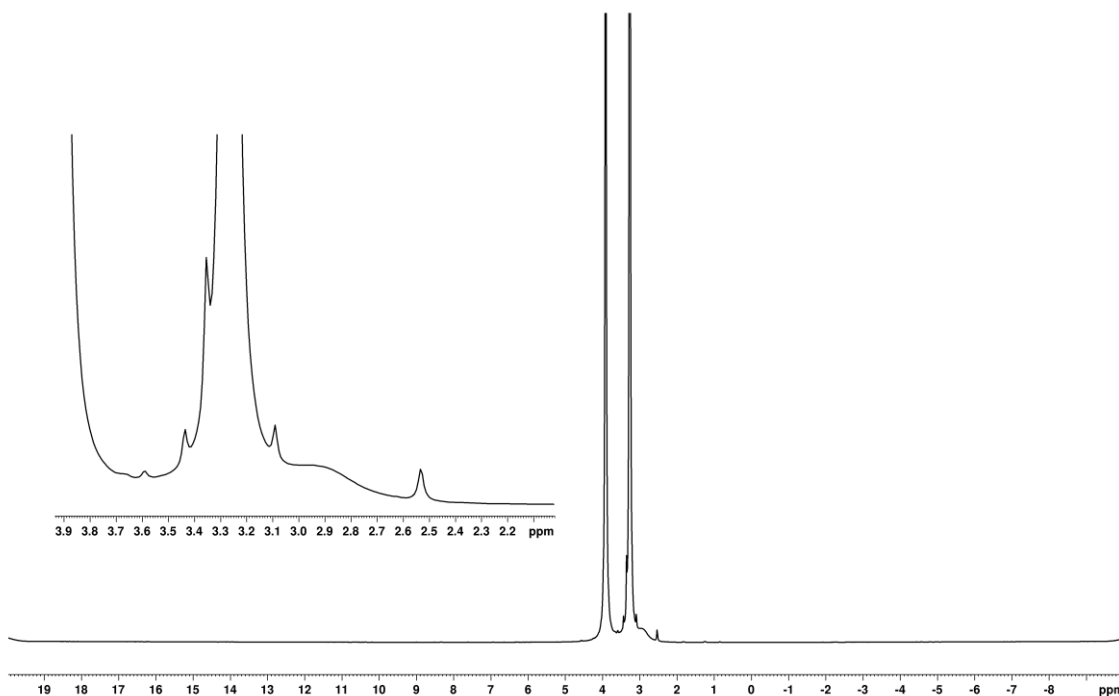

Figure S4:  $^2\text{H}$  NMR spectrum of the reaction mixture of  $\text{IDipp}\cdot\text{BH}_2\text{Bi}(\text{SiMe}_3)_2$  with 1,4-benzoquinone and  $\text{MeOH-}d_4$  (298 K).

### 3. NMR Data

#### a. $\text{KBi}(\text{SiMe}_3)_2(\text{THF})_{0.3}$

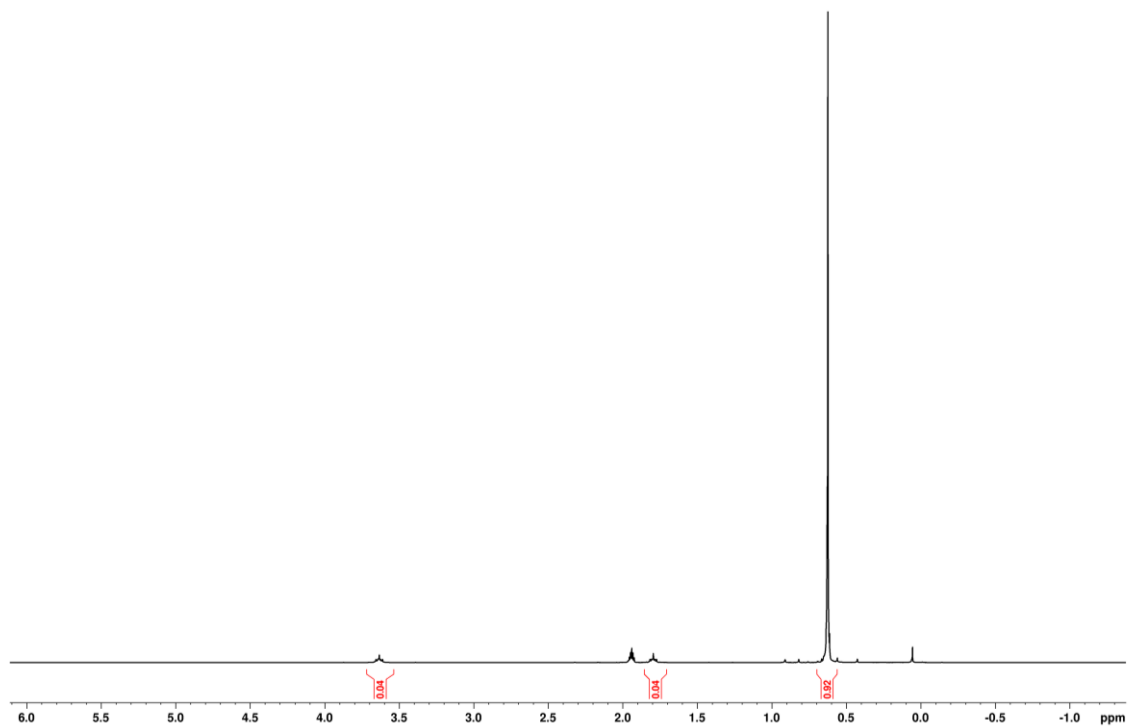

Figure S5:  $^1\text{H}$  NMR spectrum of  $\text{KBi}(\text{SiMe}_3)_2(\text{THF})_{0.3}$  ( $\text{CD}_3\text{CN}$ , 298 K).

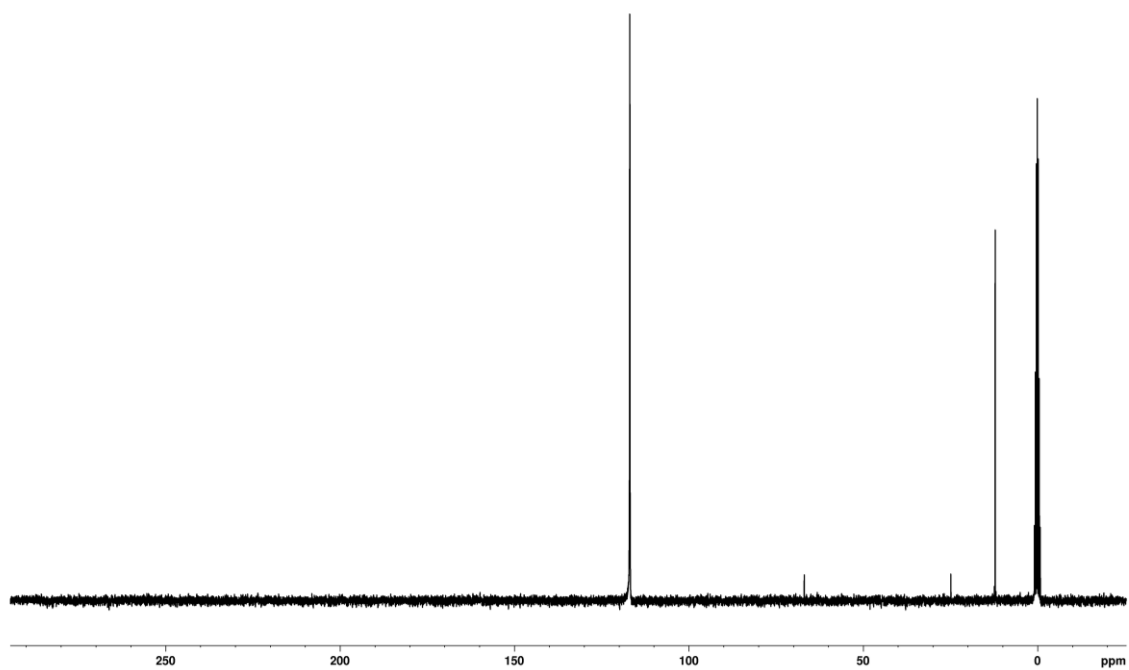

Figure S6:  $^{13}\text{C}\{^1\text{H}\}$  NMR spectrum of  $\text{KBi}(\text{SiMe}_3)_2(\text{THF})_{0.3}$  ( $\text{CD}_3\text{CN}$ , 298 K).

**b. DMAP·BH<sub>3</sub>**

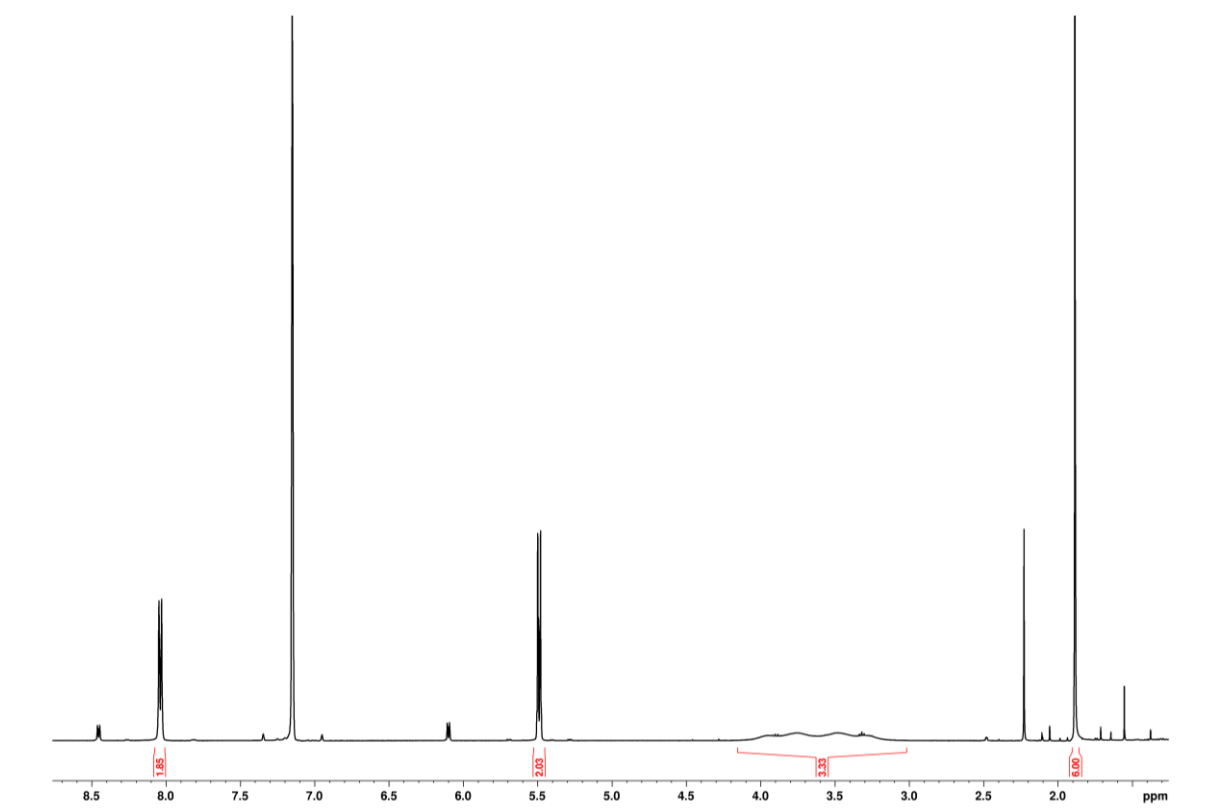

Figure S7: <sup>1</sup>H NMR spectrum of DMAP·BH<sub>3</sub> (C<sub>6</sub>D<sub>6</sub>, 298 K).

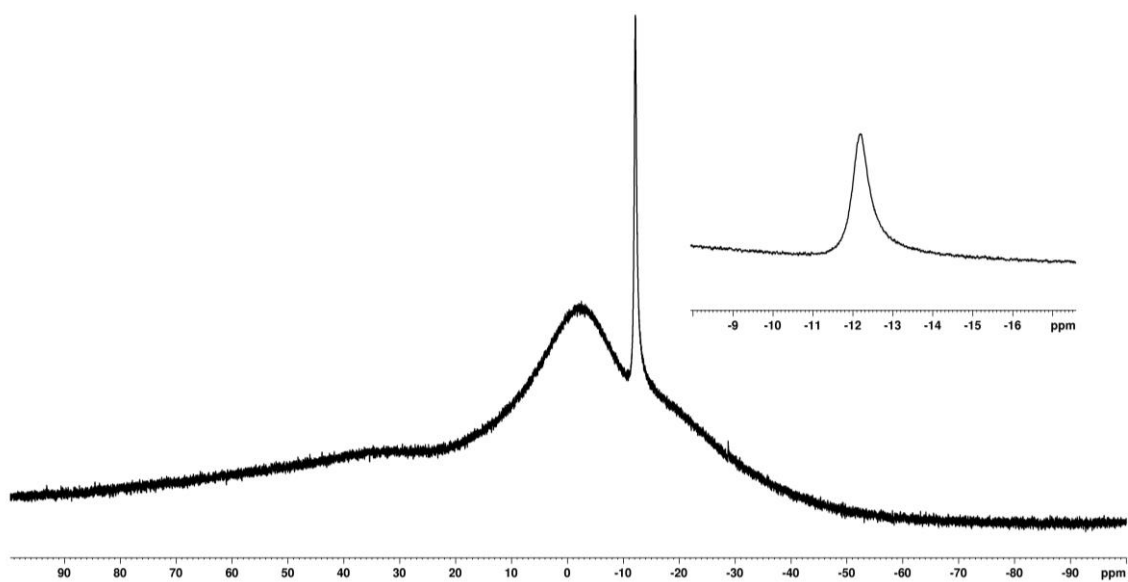

Figure S8: <sup>11</sup>B{<sup>1</sup>H} NMR spectrum of DMAP·BH<sub>3</sub> (C<sub>6</sub>D<sub>6</sub>, 298 K).

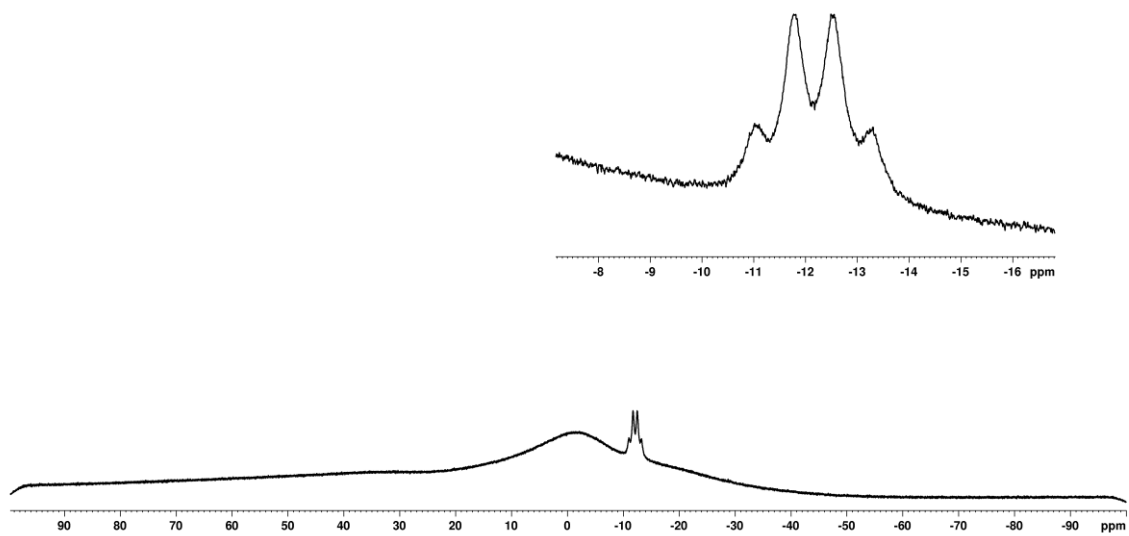

Figure S9:  $^{11}\text{B}$  NMR spectrum of  $\text{DMAP}\cdot\text{BH}_3$  ( $\text{C}_6\text{D}_6$ , 298 K).

### c. $\text{IMe}_4\cdot\text{BH}_2\text{I}$

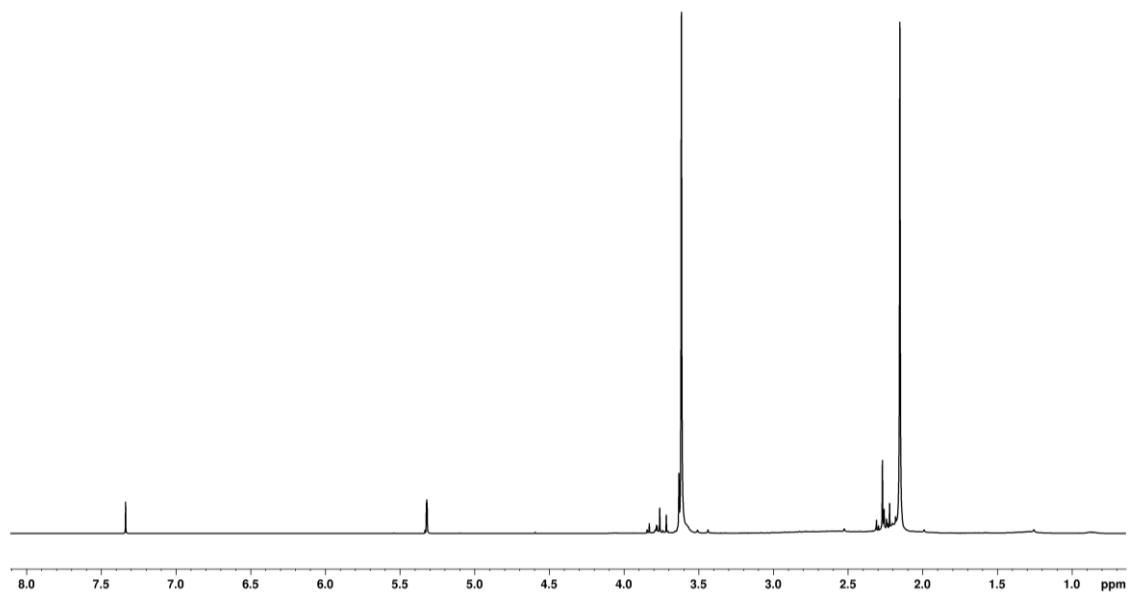

Figure S10:  $^1\text{H}$  NMR spectrum of  $\text{IMe}_4\cdot\text{BH}_2\text{I}$  ( $\text{CD}_2\text{Cl}_2$ , 298 K).

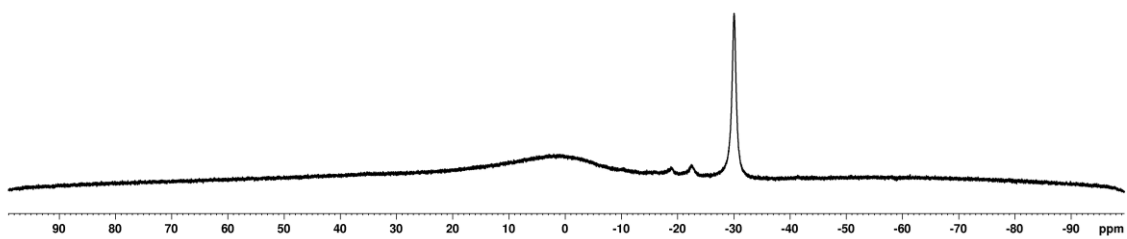

Figure S11:  $^{11}\text{B}\{^1\text{H}\}$  NMR spectrum of  $\text{IMe}_4\cdot\text{BH}_2\text{I}$  ( $\text{CD}_2\text{Cl}_2$ , 298 K).

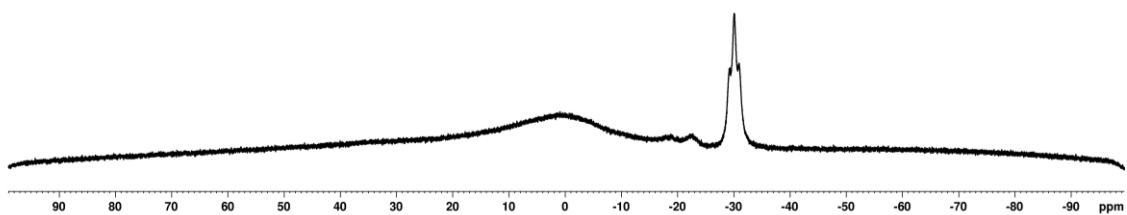

Figure S12:  $^{11}\text{B}$  NMR spectrum of  $\text{IMe}_4\cdot\text{BH}_2\text{I}$  ( $\text{CD}_2\text{Cl}_2$ , 298 K).

d. DMAP·BH<sub>2</sub>I

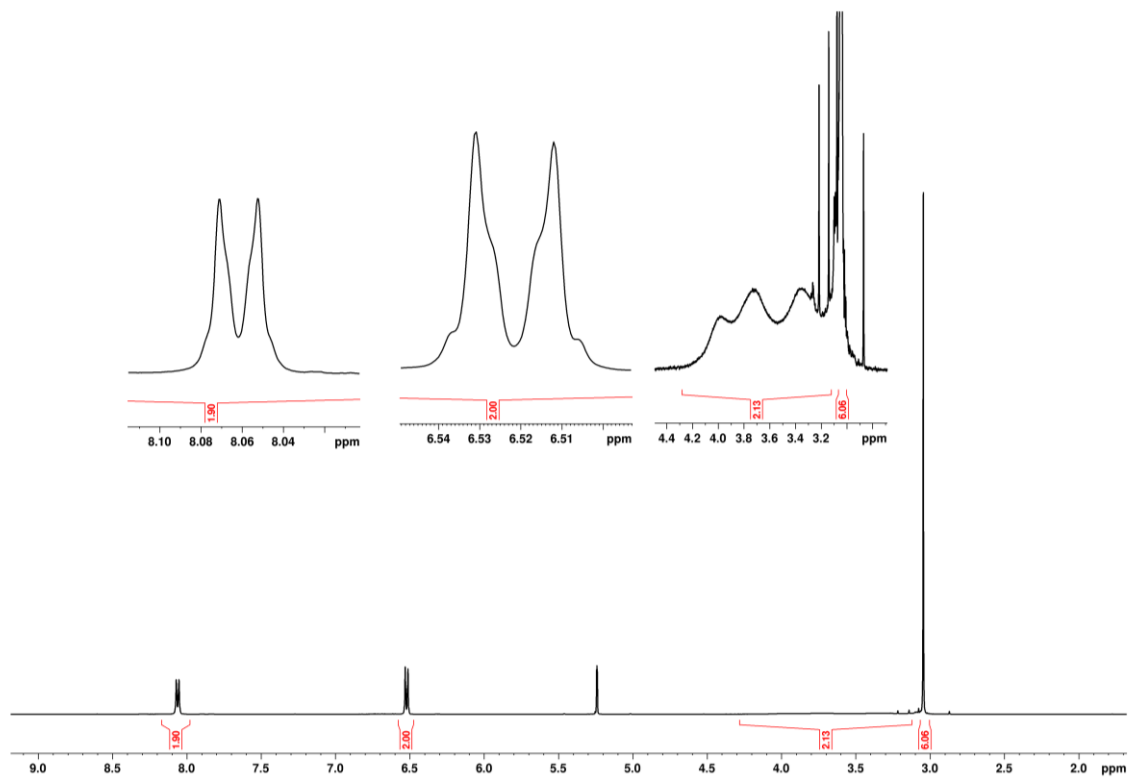

Figure S13: <sup>1</sup>H NMR spectrum of DMAP·BH<sub>2</sub>I (C<sub>6</sub>D<sub>6</sub>, 298 K).

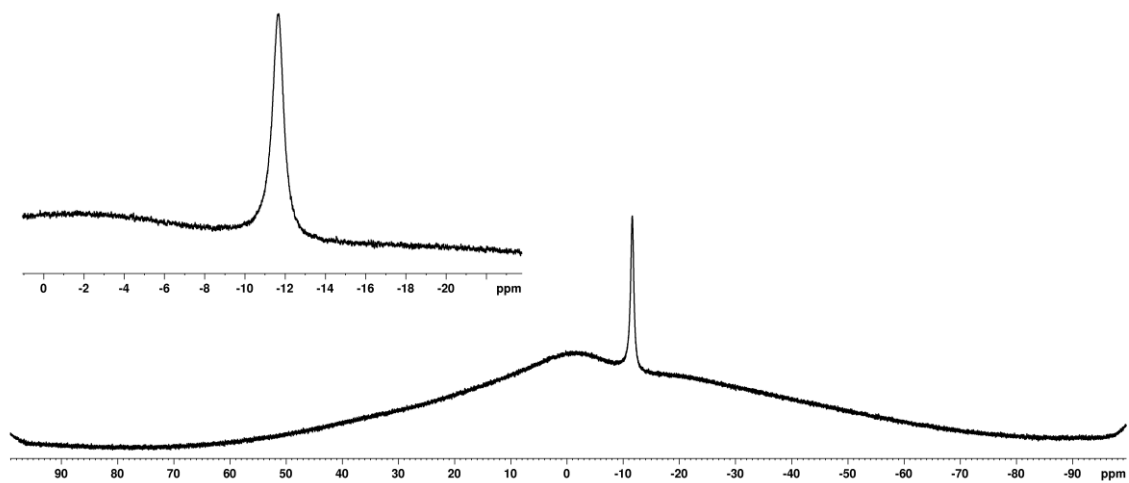

Figure S14: <sup>11</sup>B{<sup>1</sup>H} NMR spectrum of DMAP·BH<sub>2</sub>I (CD<sub>2</sub>Cl<sub>2</sub>, 298 K).



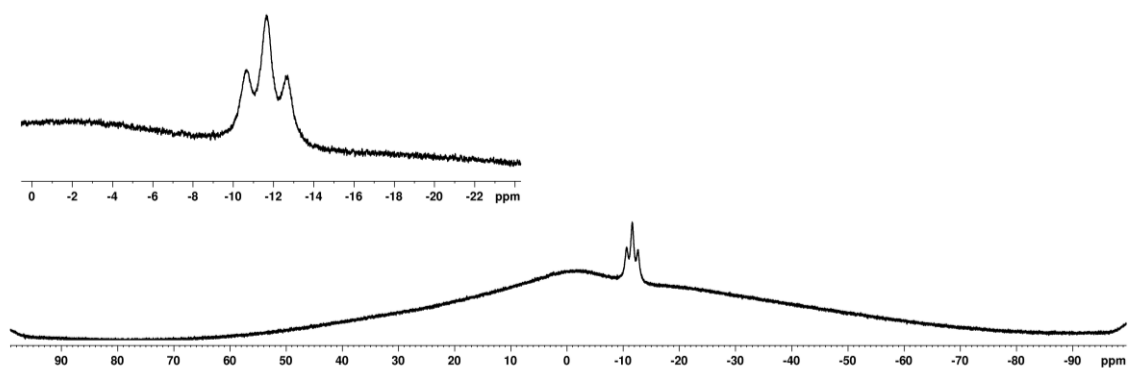

Figure S15:  $^{11}\text{B}$  NMR spectrum of  $\text{DMAP}\cdot\text{BH}_2\text{I}$  ( $\text{CD}_2\text{Cl}_2$ , 298 K).

### e. $\text{DMAP}\cdot\text{BH}_2\text{Bi}(\text{SiMe}_3)_2$

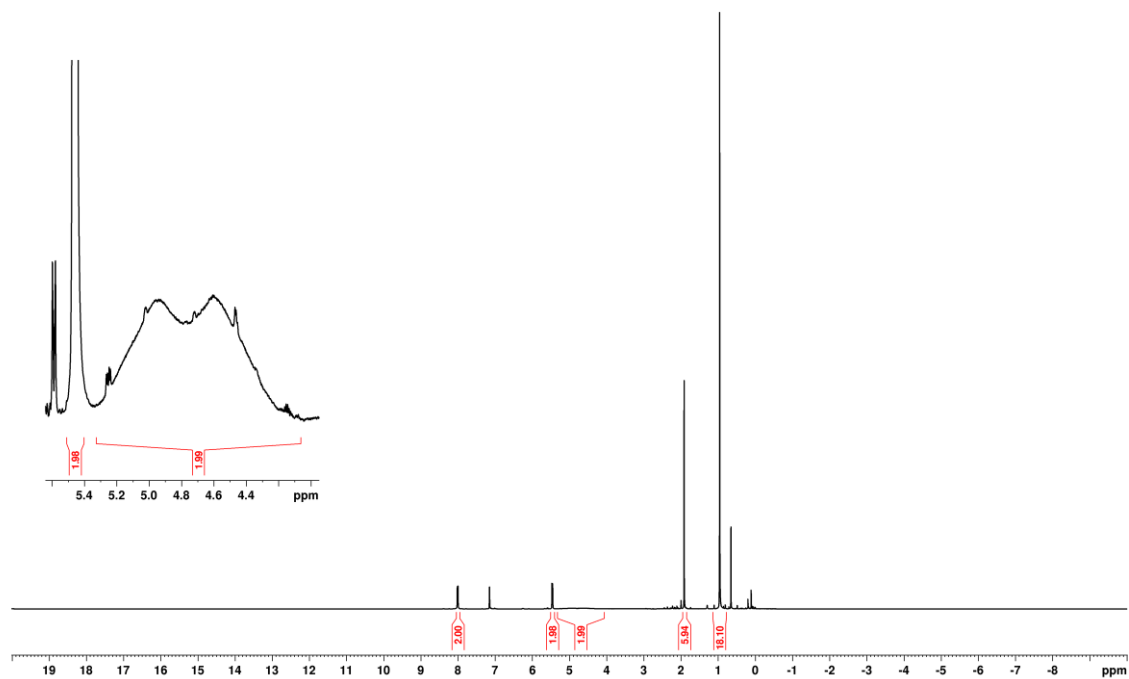

Figure S16:  $^1\text{H}$  NMR spectrum of  $\text{DMAP}\cdot\text{BH}_2\text{Bi}(\text{SiMe}_3)_2$  ( $\text{C}_6\text{D}_6$ , 298 K).

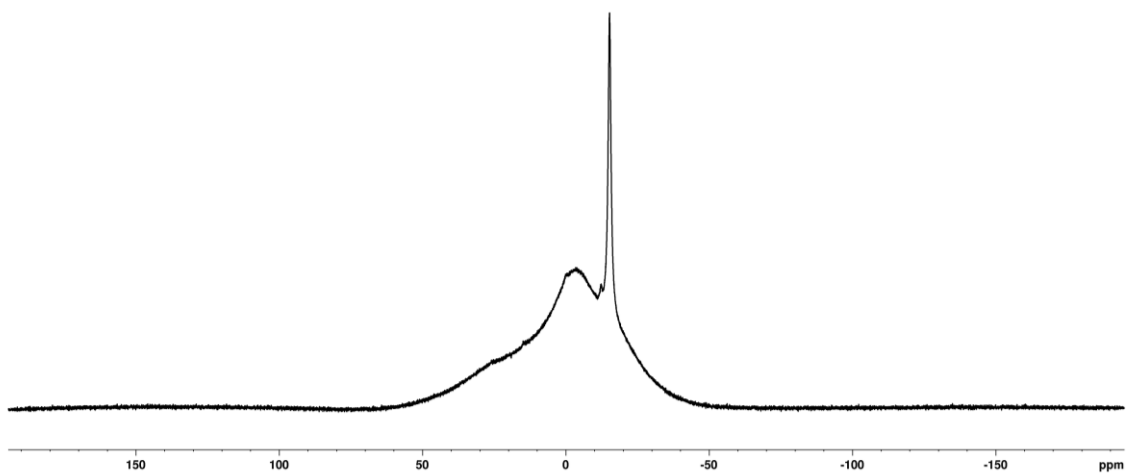

Figure S17:  $^{11}\text{B}\{^1\text{H}\}$  NMR spectrum of  $\text{DMAP}\cdot\text{BH}_2\text{Bi}(\text{SiMe}_3)_2$  ( $\text{C}_6\text{D}_6$ , 298 K).

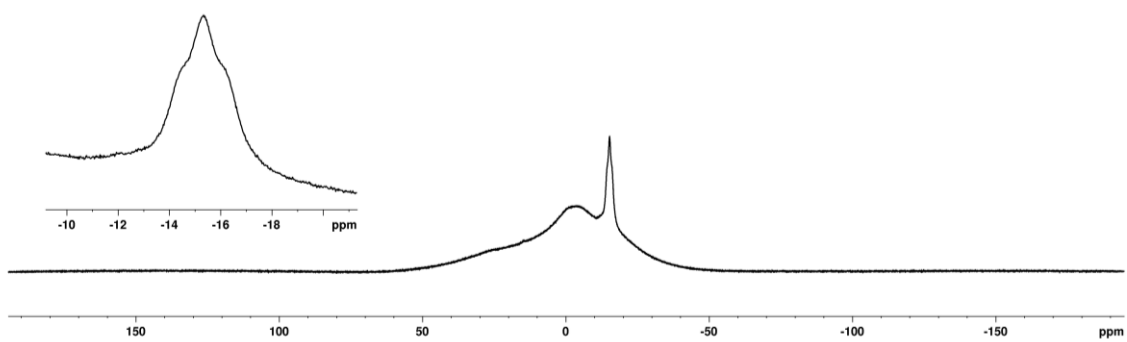

Figure S18:  $^{11}\text{B}$  NMR spectrum of  $\text{DMAP}\cdot\text{BH}_2\text{Bi}(\text{SiMe}_3)_2$  ( $\text{C}_6\text{D}_6$ , 298 K).

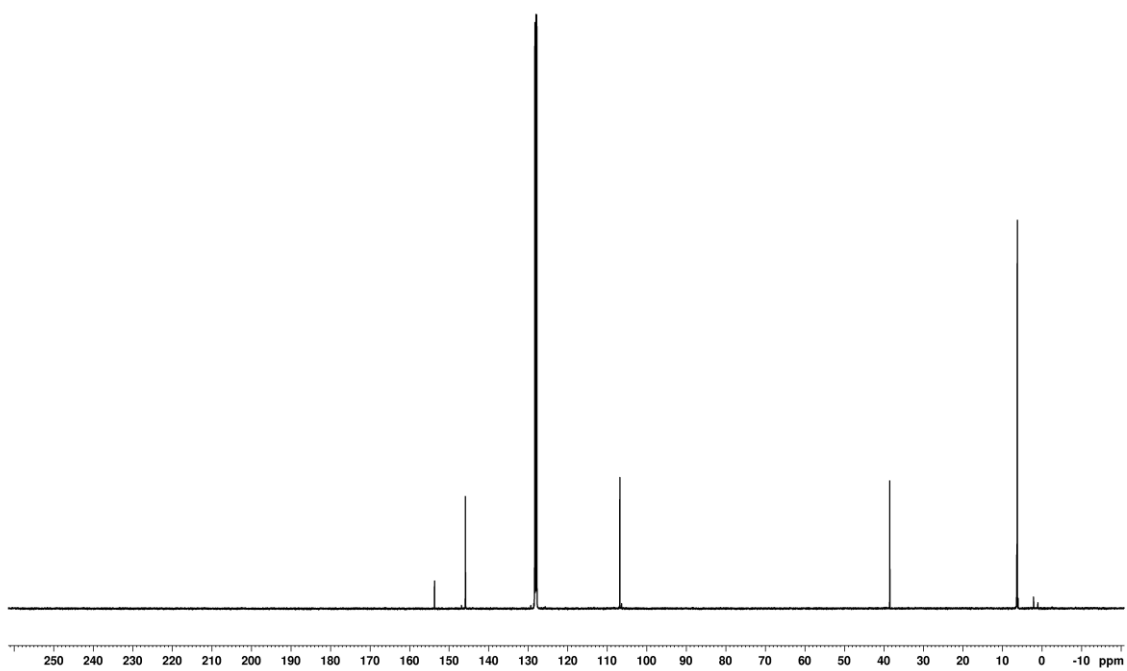

Figure S 19:  $^{13}\text{C}\{^1\text{H}\}$  NMR spectrum of  $\text{DMAP}\cdot\text{BH}_2\text{Bi}(\text{SiMe}_3)_2$  ( $\text{C}_6\text{D}_6$ , 298 K).

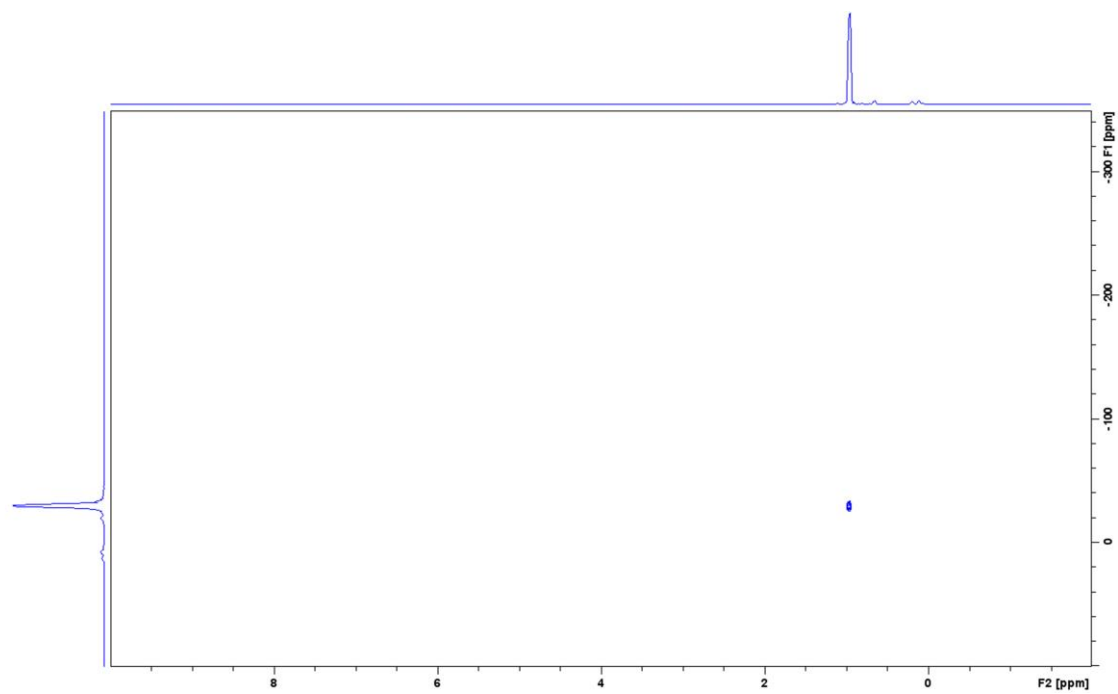

Figure S 20:  $^1\text{H}$ ,  $^{29}\text{Si}$  HMBC spectrum of  $\text{DMAP}\cdot\text{BH}_2\text{Bi}(\text{SiMe}_3)_2$  ( $\text{C}_6\text{D}_6$ , 298 K).

f. IDipp-BH<sub>2</sub>Bi(SiMe<sub>3</sub>)<sub>2</sub>

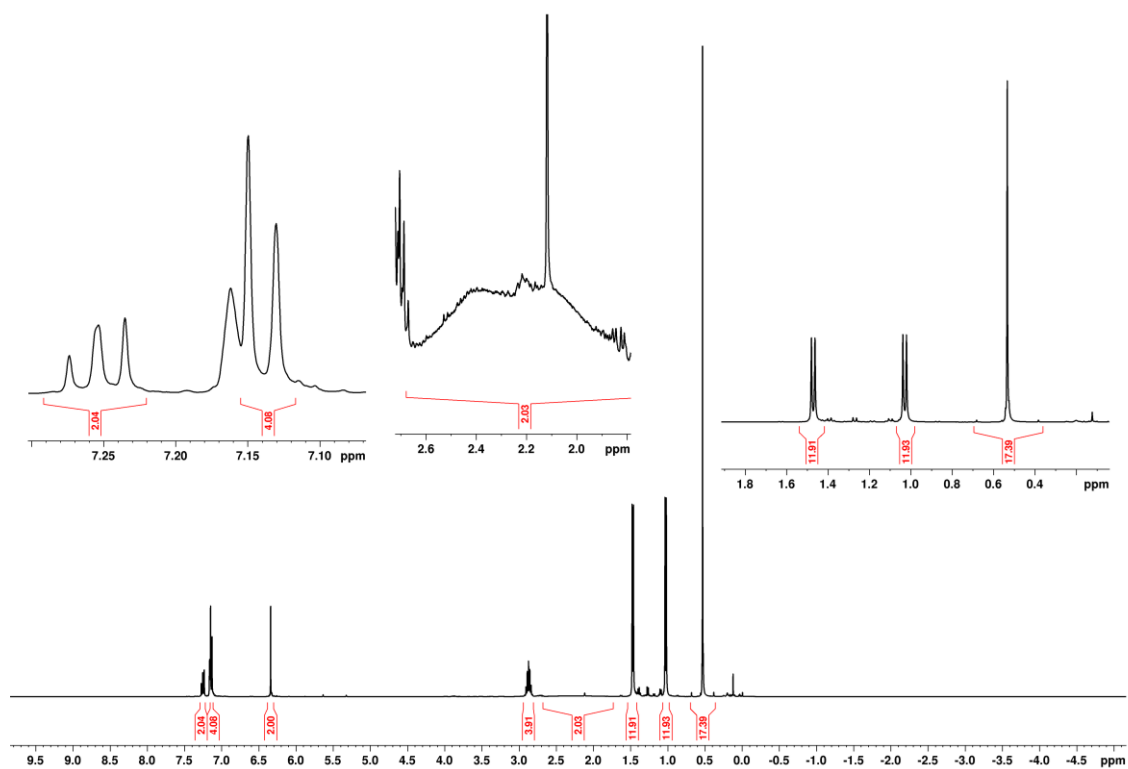

Figure S21: <sup>1</sup>H NMR spectrum of IDipp-BH<sub>2</sub>Bi(SiMe<sub>3</sub>)<sub>2</sub> (C<sub>6</sub>D<sub>6</sub>, 298 K).

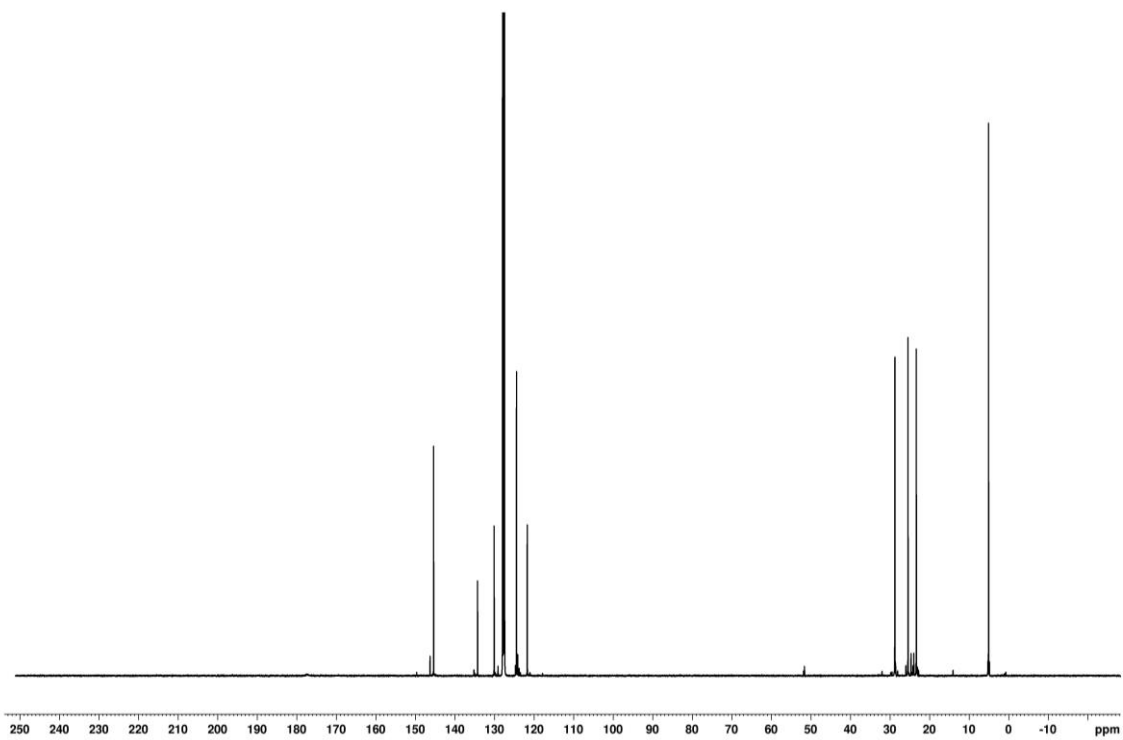

Figure S 22: <sup>13</sup>C{<sup>1</sup>H} NMR spectrum of IDipp-BH<sub>2</sub>Bi(SiMe<sub>3</sub>)<sub>2</sub> (C<sub>6</sub>D<sub>6</sub>, 298 K).

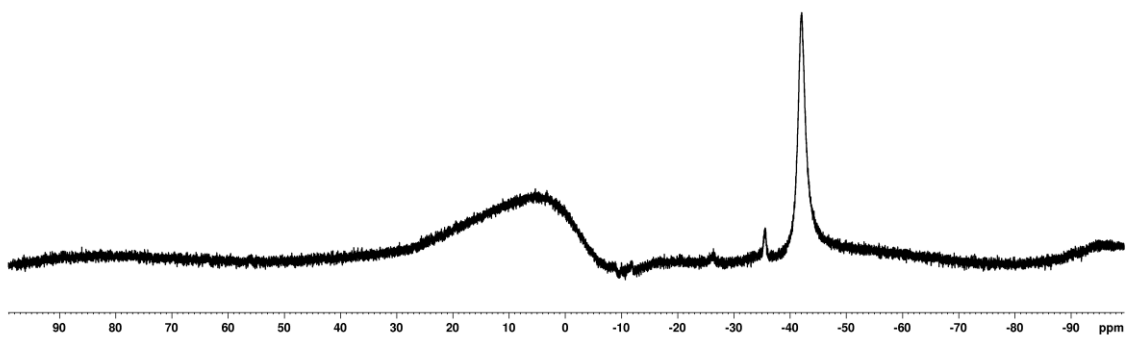

Figure S23:  $^{11}\text{B}\{^1\text{H}\}$  NMR spectrum of  $\text{IDipp}\cdot\text{BH}_2\text{Bi}(\text{SiMe}_3)_2$  ( $\text{C}_6\text{D}_6$ , 298 K).

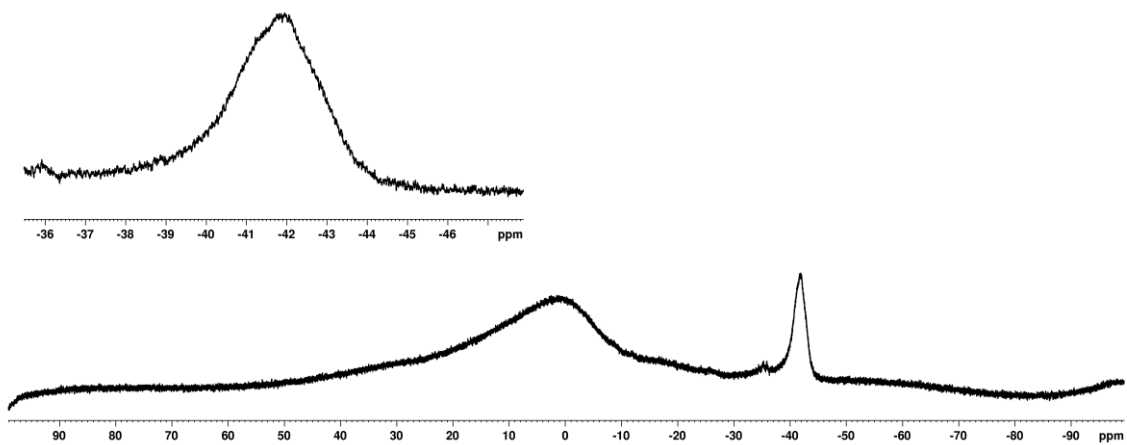

Figure S24:  $^{11}\text{B}$  NMR spectrum of  $\text{IDipp}\cdot\text{BH}_2\text{Bi}(\text{SiMe}_3)_2$  ( $\text{C}_6\text{D}_6$ , 298 K).

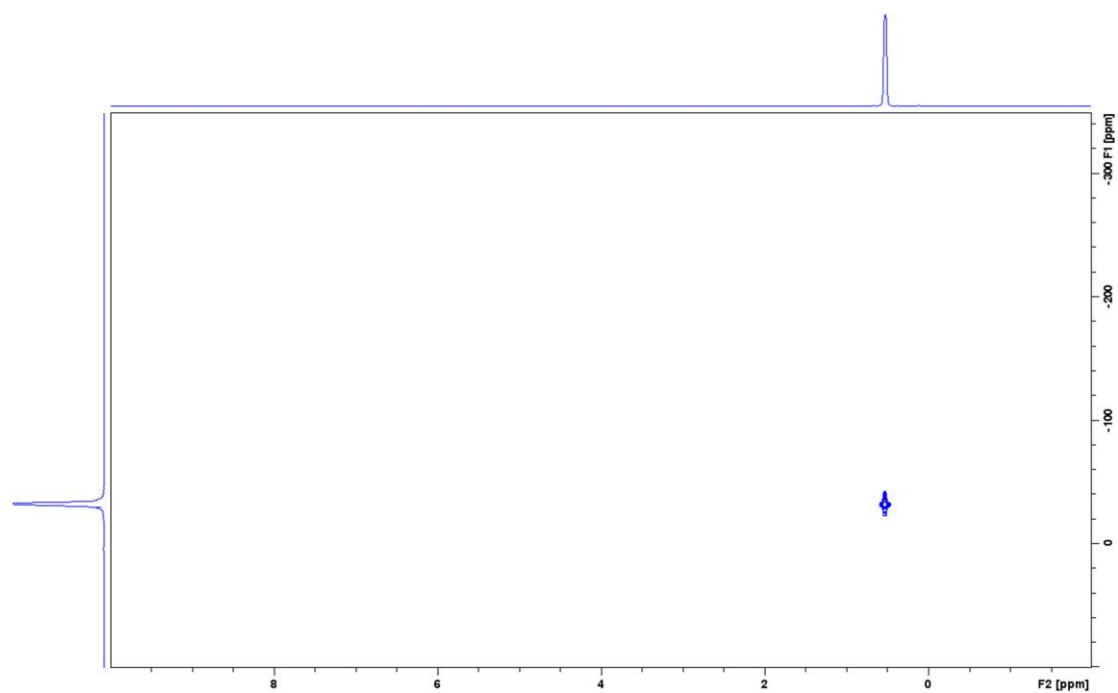

Figure S 25:  $^1\text{H}$ ,  $^{29}\text{Si}$  HMBC spectrum of  $\text{IDipp}\cdot\text{BH}_2\text{Bi}(\text{SiMe}_3)_2$  ( $\text{C}_6\text{D}_6$ , 298 K).

### g. $\text{IME}_4\cdot\text{BH}_2\text{Bi}(\text{SiMe}_3)_2$

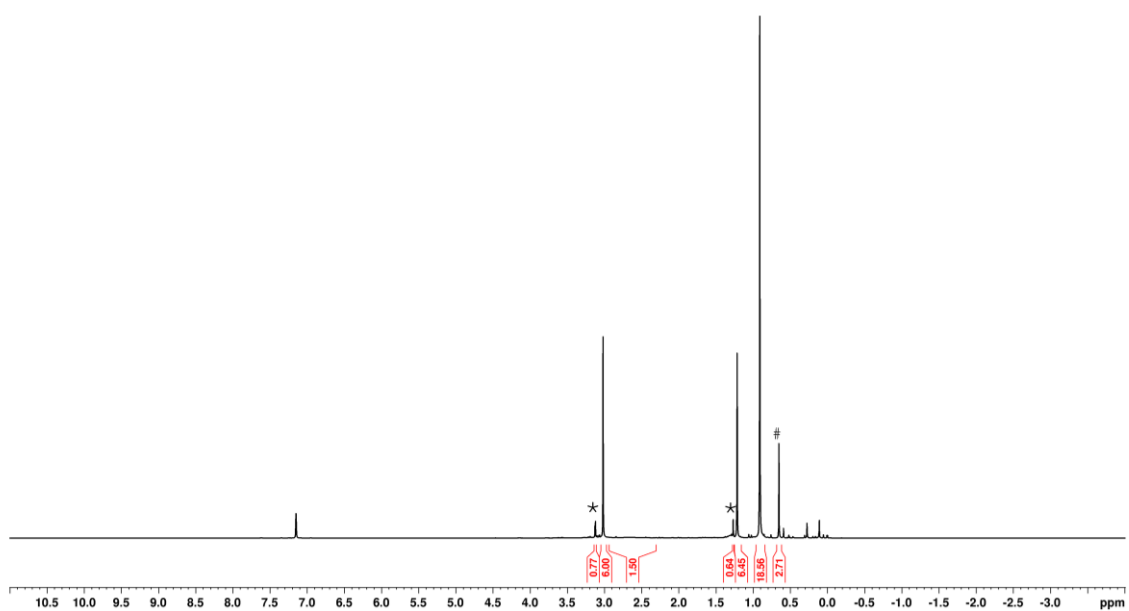

Figure S26:  $^1\text{H}$  NMR spectrum of  $\text{IME}_4\cdot\text{BH}_2\text{Bi}(\text{SiMe}_3)_2$  ( $\text{C}_6\text{D}_6$ , 298 K; side products from sample decomposition \* =  $\text{IME}_4\cdot\text{BH}_3$ , # =  $\text{Me}_3\text{Si}\cdot\text{SiMe}_3$ ; ratios \*/**1b** = 0.09, #/**1b** = 0.14).

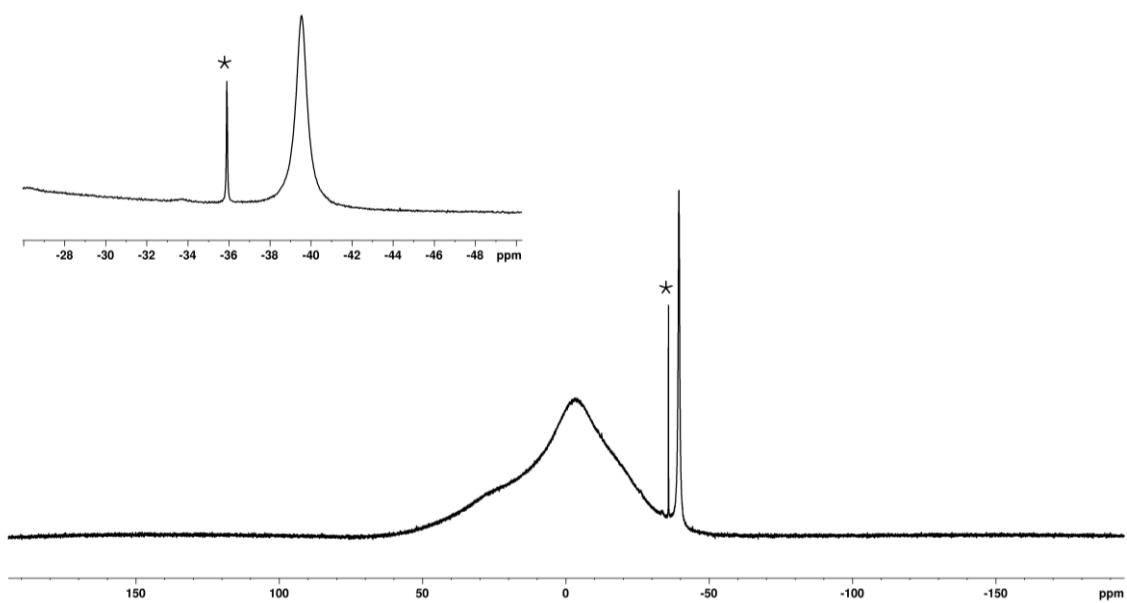

Figure S27:  $^{11}\text{B}\{^1\text{H}\}$  NMR spectrum of  $\text{IMe}_4\cdot\text{BH}_2\text{Bi}(\text{SiMe}_3)_2$  ( $\text{C}_6\text{D}_6$ , 298 K, \* =  $\text{IMe}_4\cdot\text{BH}_3$ ).

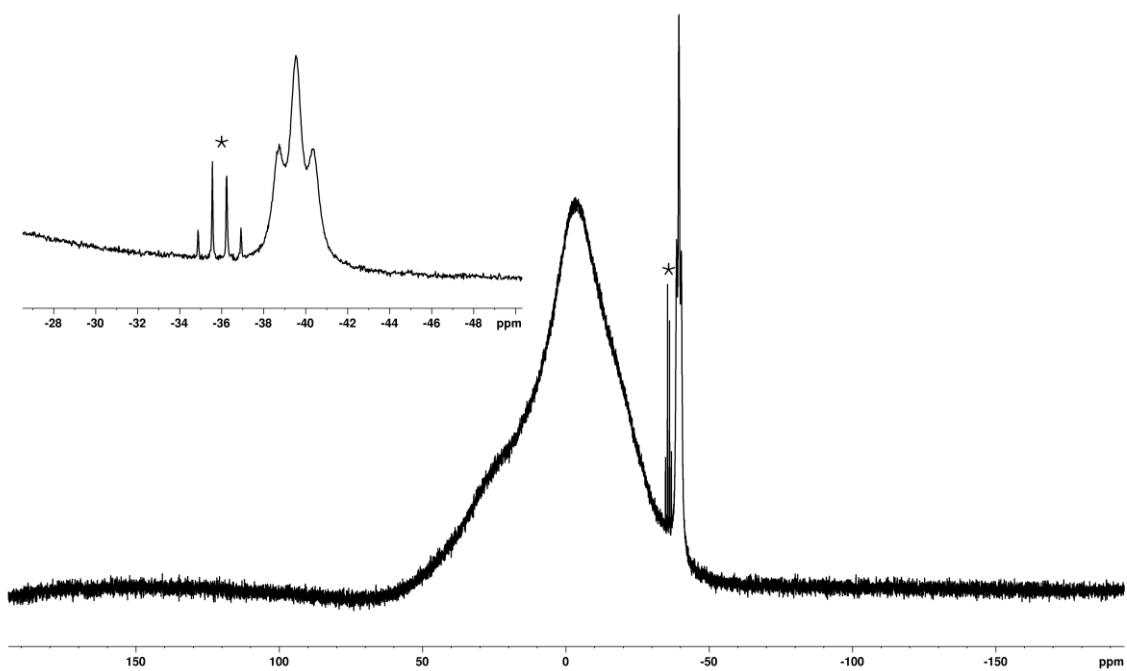

Figure S28:  $^{11}\text{B}$  NMR spectrum of  $\text{IMe}_4\cdot\text{BH}_2\text{Bi}(\text{SiMe}_3)_2$  ( $\text{C}_6\text{D}_6$ , 298 K, \* =  $\text{IMe}_4\cdot\text{BH}_3$ ).

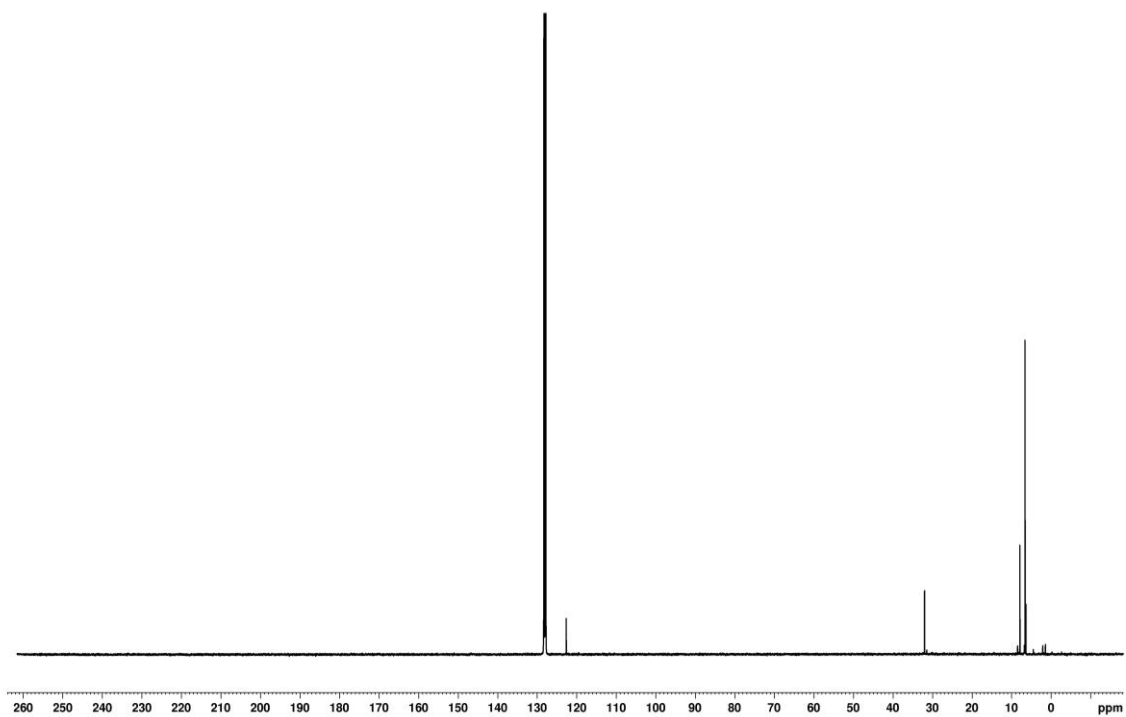

Figure S 29:  $^{13}\text{C}\{^1\text{H}\}$  NMR spectrum of  $\text{IMe}_4\cdot\text{BH}_2\text{Bi}(\text{SiMe}_3)_2$  ( $\text{C}_6\text{D}_6$ , 298 K).

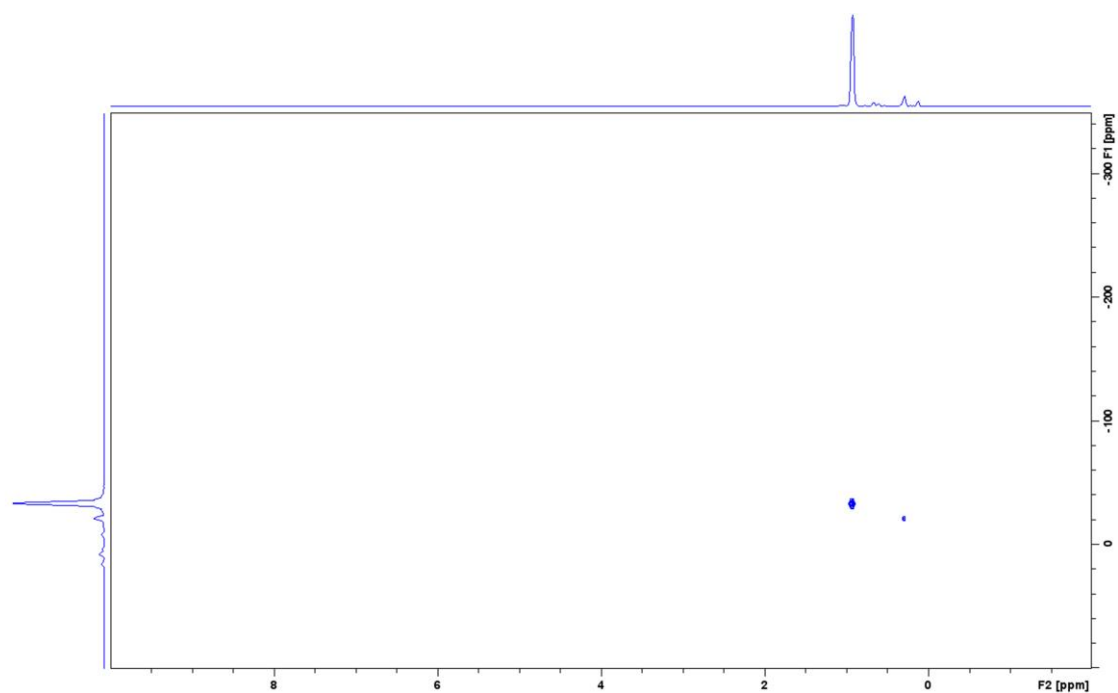

Figure S 30:  $^1\text{H}$ ,  $^{29}\text{Si}$  HMBC spectrum of  $\text{IMe}_4\cdot\text{BH}_2\text{Bi}(\text{SiMe}_3)_2$  ( $\text{C}_6\text{D}_6$ , 298 K).



## h. Crude NMR spectra of desilylation attempt

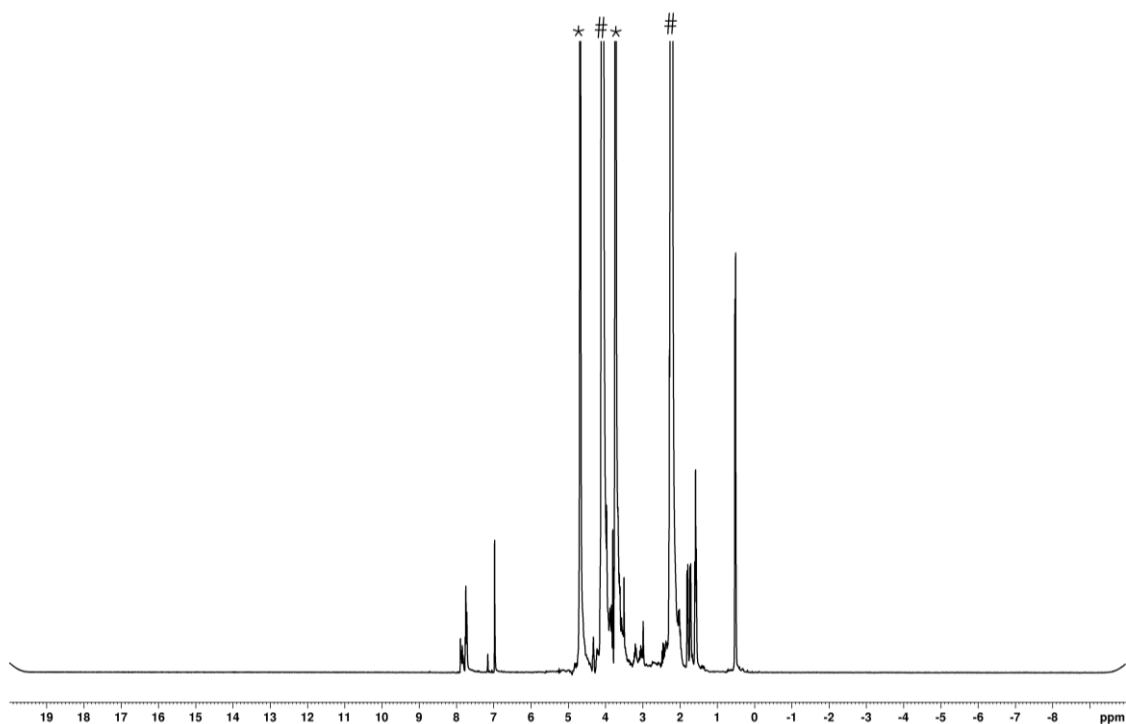

Figure S 31:  $^1\text{H}$  NMR spectrum of the reaction mixture of  $\text{IDipp}\cdot\text{BH}_2\text{Bi}(\text{SiMe}_3)_2$  with benzoquinone in THF/MeOH ( $\text{C}_6\text{D}_6$ -cap., 298 K; \* = MeOH, # = THF).

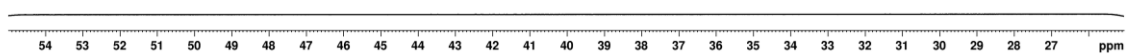

Figure S 32: Expanded  $^1\text{H}$  NMR spectrum (> 20 ppm) of the reaction mixture of  $\text{IDipp}\cdot\text{BH}_2\text{Bi}(\text{SiMe}_3)_2$  with benzoquinone in THF/MeOH, showing no signs of Bi-H moieties ( $\text{C}_6\text{D}_6$ -cap., 298 K).

i. IDipp-GaH<sub>2</sub>Bi(SiMe<sub>3</sub>)<sub>2</sub>

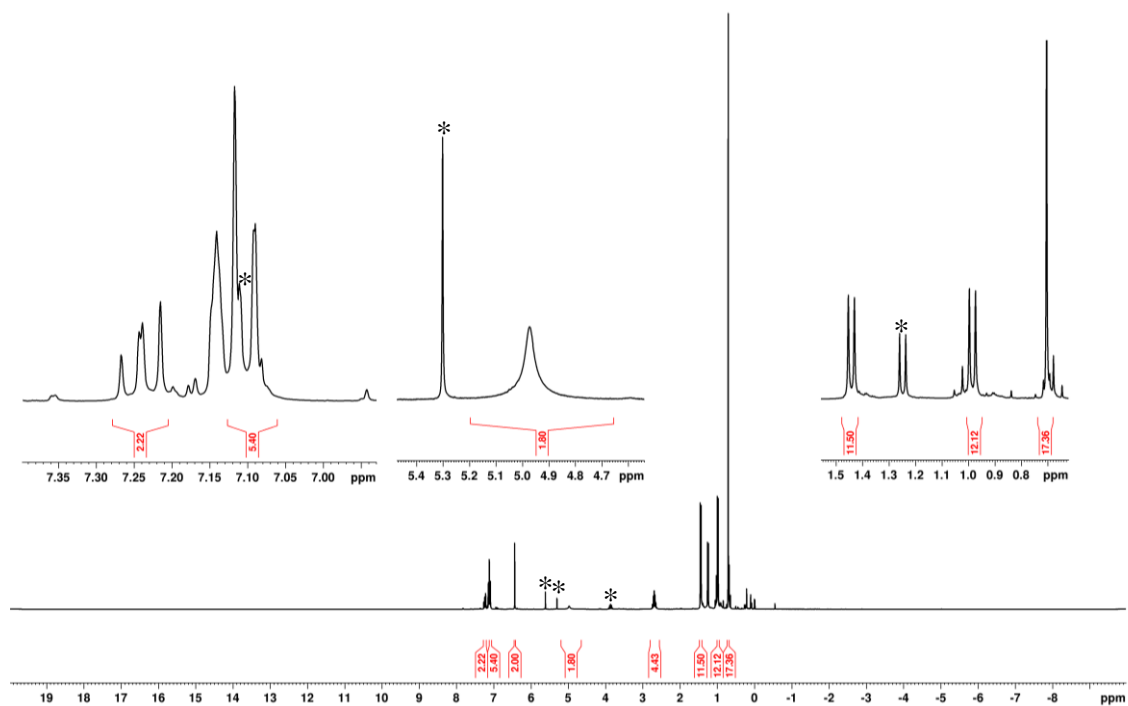

Figure S33: <sup>1</sup>H NMR spectrum of IDipp-GaH<sub>2</sub>Bi(SiMe<sub>3</sub>)<sub>2</sub> (C<sub>6</sub>D<sub>6</sub>, 298 K, \* = IDipp-H<sub>2</sub>).

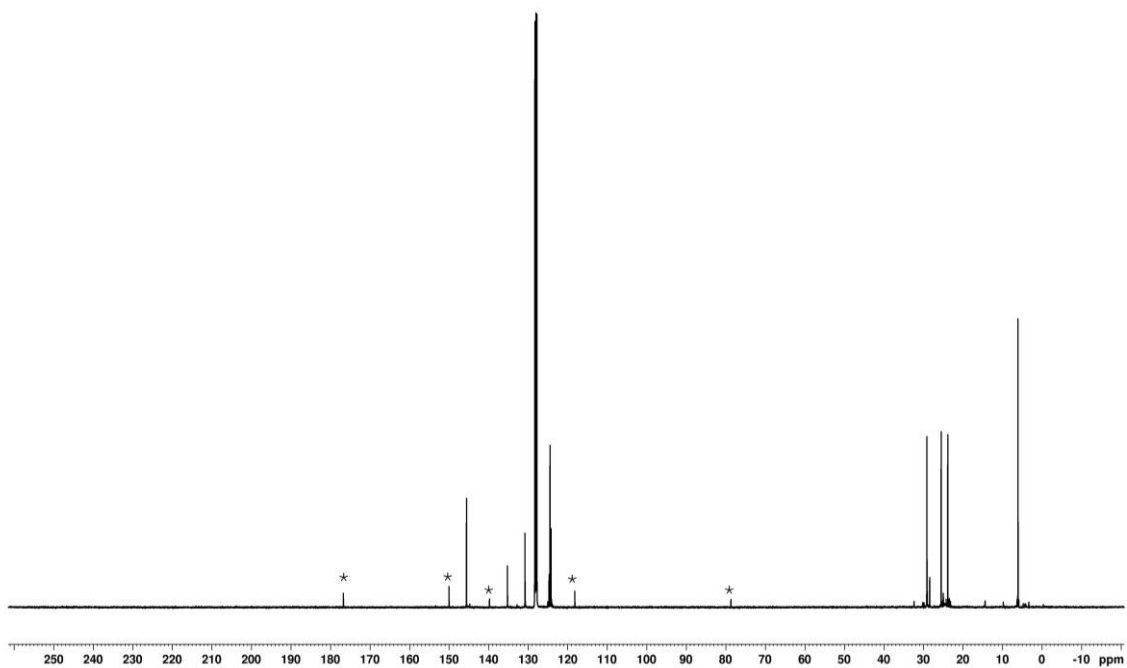

Figure S34: <sup>13</sup>C{<sup>1</sup>H} NMR spectrum of IDipp-GaH<sub>2</sub>Bi(SiMe<sub>3</sub>)<sub>2</sub> (C<sub>6</sub>D<sub>6</sub>, 298 K, \* = IDipp-H<sub>2</sub>).

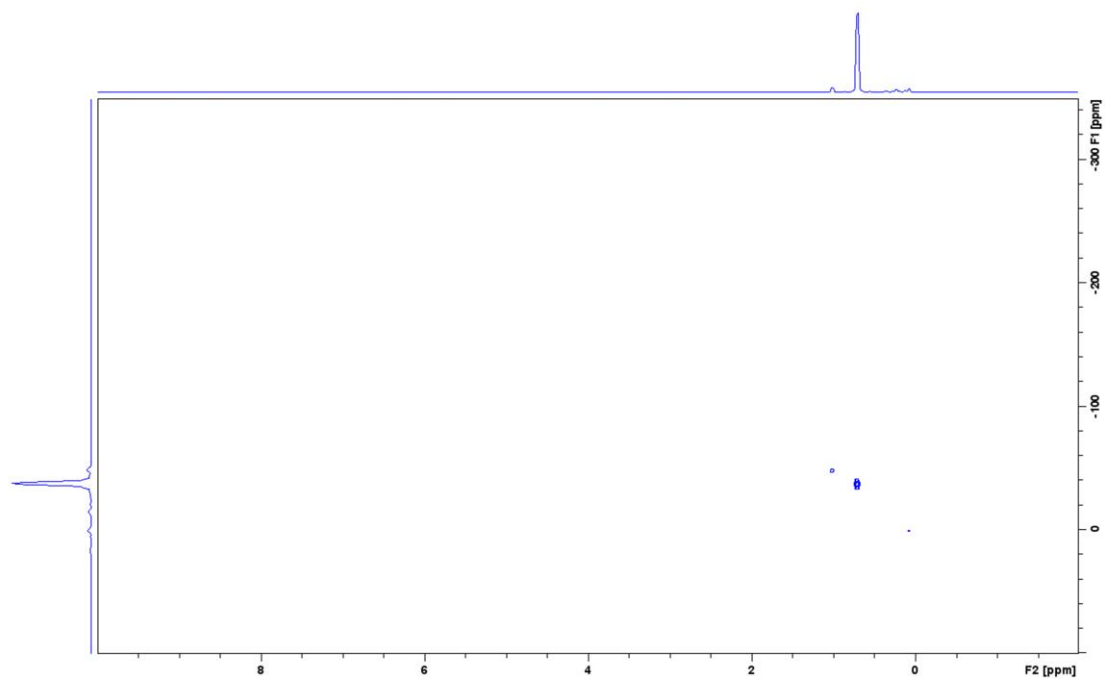

Figure S 35:  $^1\text{H}$ ,  $^{29}\text{Si}$  HMBC spectrum of  $\text{IIDipp}\cdot\text{GaH}_2\text{Bi}(\text{SiMe}_3)_2$  ( $\text{C}_6\text{D}_6$ , 298 K).

## 4. Mass spectra

### a. IDipp·BH<sub>2</sub>Bi(SiMe<sub>3</sub>)<sub>2</sub>

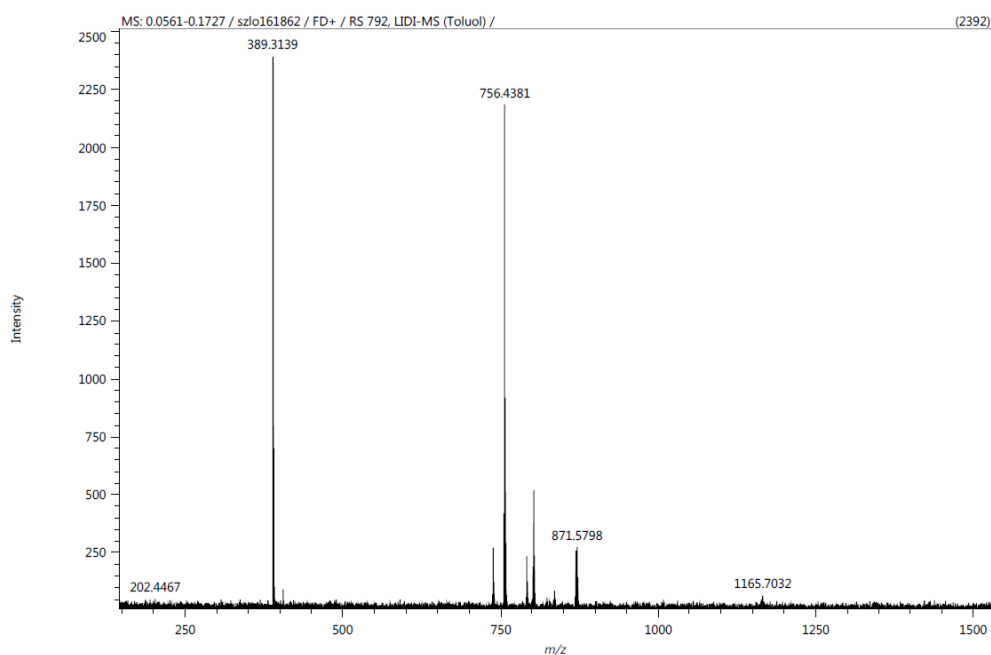

Figure S 36: LIFDI-MS spectrum of a solution of IDipp·BH<sub>2</sub>Bi(SiMe<sub>3</sub>)<sub>2</sub> in toluene.

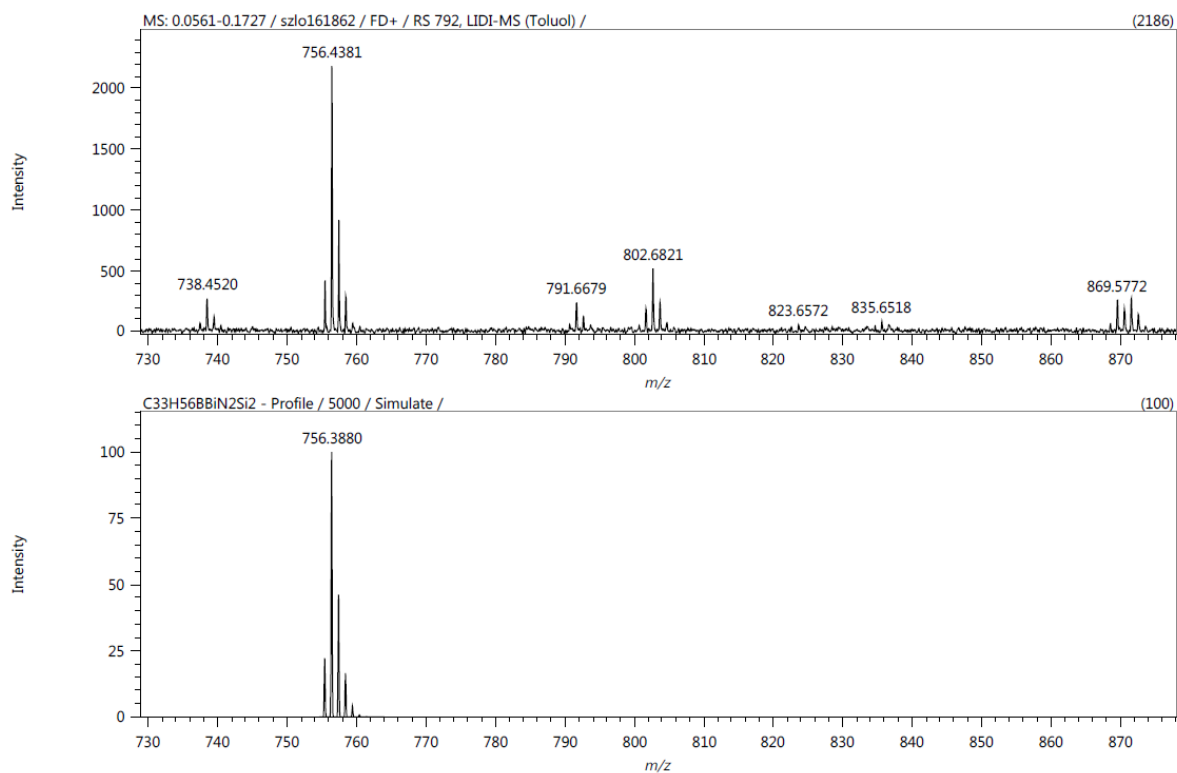

Figure S 37: Zoomed region within the LIFDI-MS spectrum of a solution of IDipp·BH<sub>2</sub>Bi(SiMe<sub>3</sub>)<sub>2</sub> in toluene (top: experiment, bottom: simulated product signal).

## b. $\text{IMe}_4\cdot\text{BH}_2\text{Bi}(\text{SiMe}_3)_2$

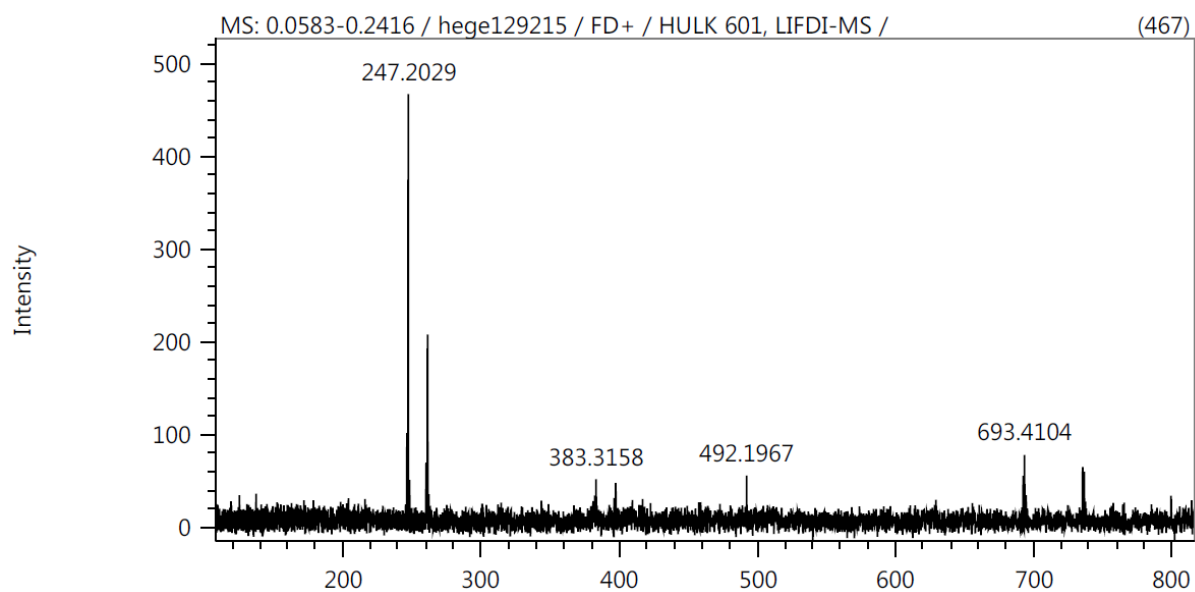

Figure S 38: LIFDI-MS spectrum of a solution of  $\text{IMe}_4\cdot\text{BH}_2\text{Bi}(\text{SiMe}_3)_2$  in toluene.

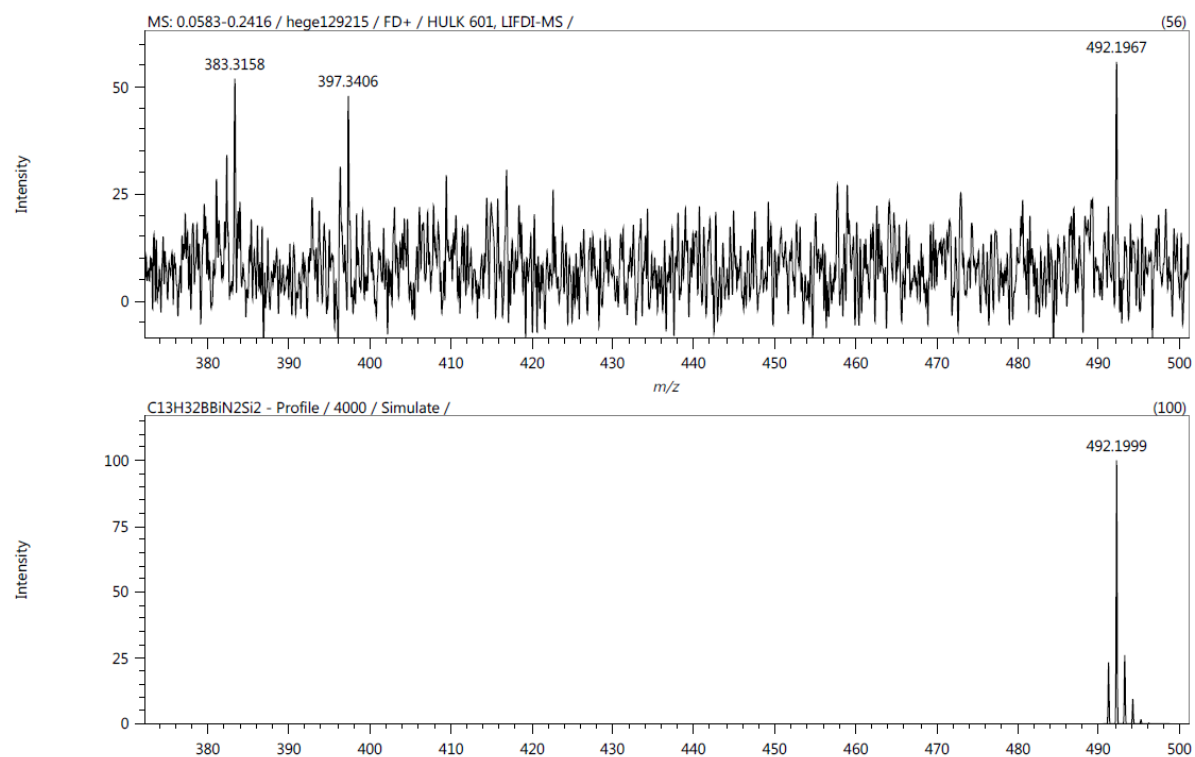

Figure S 39: Zoomed region within the LIFDI-MS spectrum of a solution of  $\text{IMe}_4\cdot\text{BH}_2\text{Bi}(\text{SiMe}_3)_2$  in toluene (top: experiment, bottom: simulated product signal).

### c. IDipp·GaH<sub>2</sub>Bi(SiMe<sub>3</sub>)<sub>2</sub>

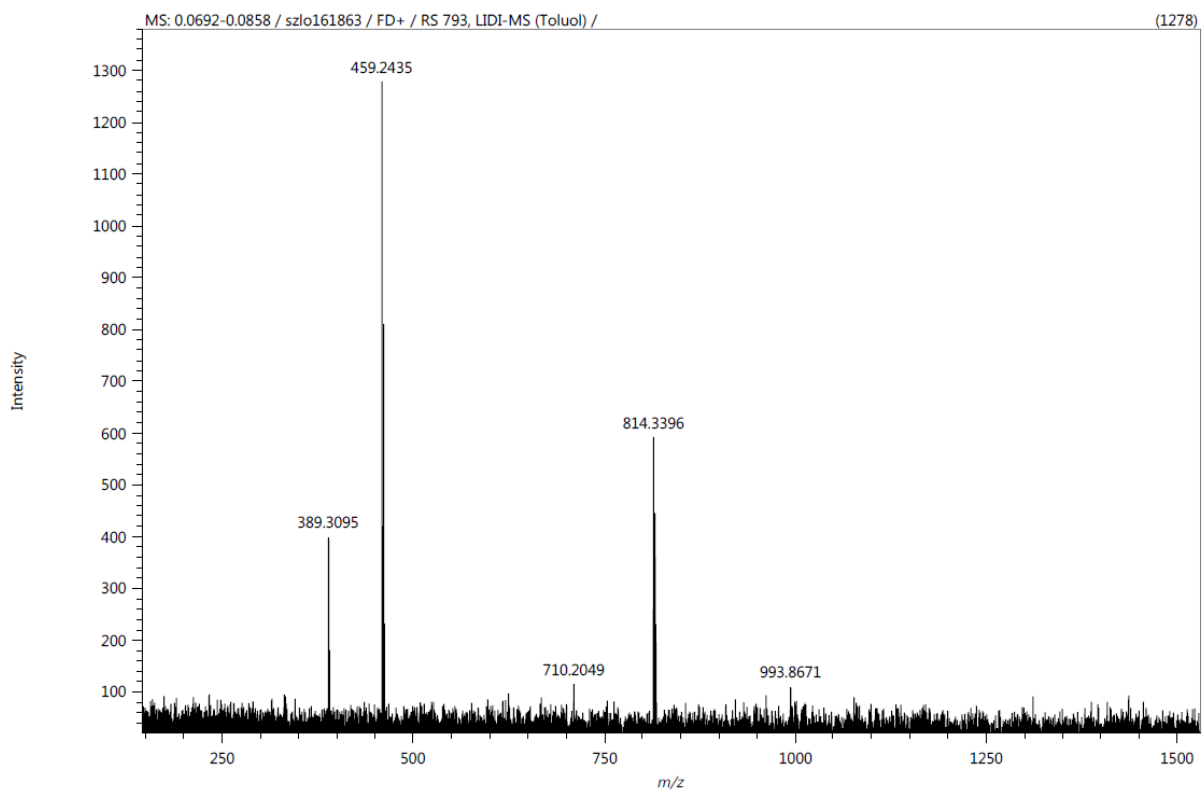

Figure S 40: LIFDI-MS spectrum of a solution of IDipp·GaH<sub>2</sub>Bi(SiMe<sub>3</sub>)<sub>2</sub> in toluene.

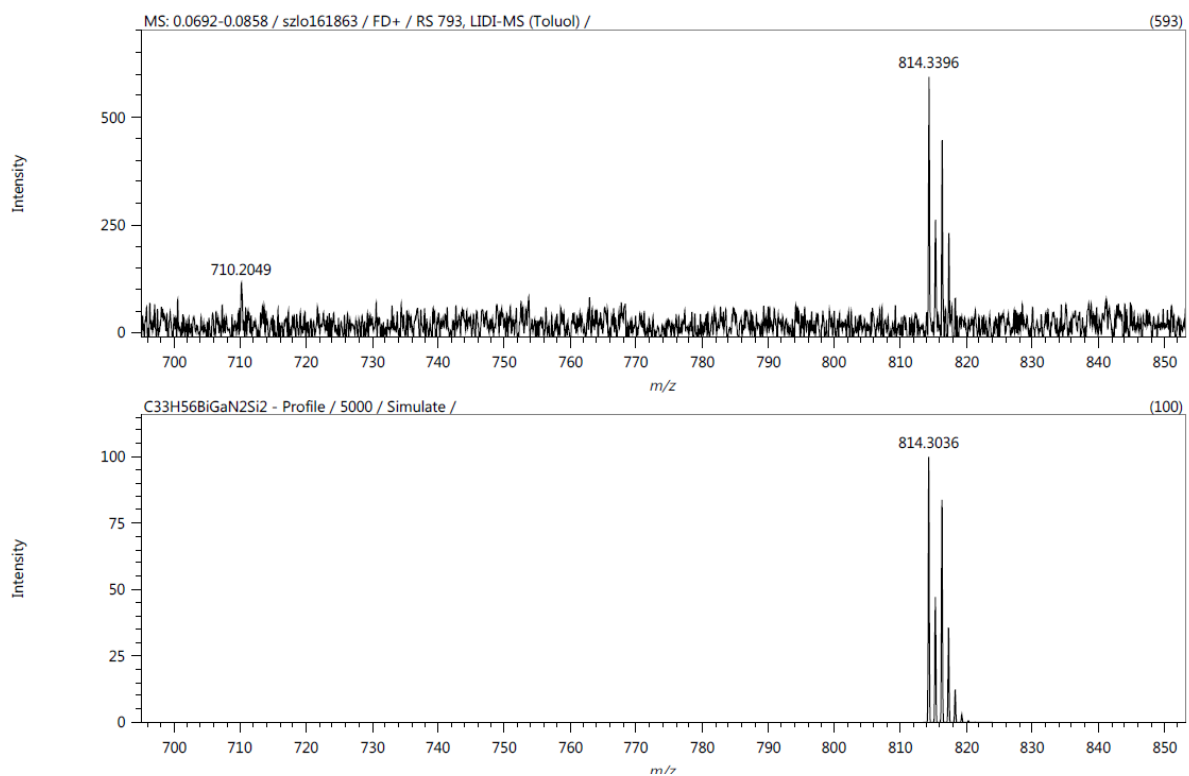

Figure S 41: Zoomed region within the LIFDI-MS spectrum of a solution of IDipp·GaH<sub>2</sub>Bi(SiMe<sub>3</sub>)<sub>2</sub> in toluene (top: experiment, bottom: simulated product signal).

## 5. Crystallographic Data

Single Crystal X-ray structure determination: Single-crystal X-ray diffraction data sets were collected using an Oxford Diffraction GV50 diffractometer (**1b**, **1c**) or a Rigaku XtaLAB Synergy R, DW system diffractometer (**1a**, **2**) equipped with a HyPix-Arc 150 detector operating at  $T = 123.01(10)$  K. Crystals were selected under mineral oil. Data reduction, scaling and absorption corrections were performed using CrysAlisPro (Rigaku, V1.171.41.90a, 2020). A gaussian absorption correction was performed using CrysAlisPro 1.171.41.90a (Rigaku Oxford Diffraction, 2020). Numerical absorption correction based on gaussian integration over a multifaceted crystal model. Empirical absorption correction using spherical harmonics, implemented in SCALE3 ABSPACK scaling algorithm. Using Olex2,<sup>[5]</sup> the structures were solved with ShelXT<sup>[6]</sup> and a least-squares refinement on  $F^2$  was carried out with ShelXL.<sup>[7]</sup> All non-hydrogen atoms were refined anisotropically. The hydrogen atoms at the carbon atoms have been located in idealized positions and refined isotropically according to the riding model. Figures were created with Olex2.

CCDC-2347535 (**1a**), CCDC-2340840 (**1b**), CCDC-2340841 (**1c**), and CCDC-2340842 (**2**), contain the supplementary crystallographic data for this paper. These data can be obtained free of charge at [www.ccdc.cam.ac.uk/conts/retrieving.html](http://www.ccdc.cam.ac.uk/conts/retrieving.html) (or from the Cambridge Crystallographic Data Centre, 12 Union Road, Cambridge CB2 1EZ, UK; Fax: +44-1223-336-033; e-mail: [deposit@ccdc.cam.ac.uk](mailto:deposit@ccdc.cam.ac.uk)).

Table S1: Crystallographic data for compounds **1a** and **1b**.

| Compound                          | <b>1a</b>                                                         | <b>1b</b>                                                         |
|-----------------------------------|-------------------------------------------------------------------|-------------------------------------------------------------------|
| CCDC                              | 2347535                                                           | 2340840                                                           |
| Formula                           | C <sub>33</sub> H <sub>56</sub> BBiN <sub>2</sub> Si <sub>2</sub> | C <sub>13</sub> H <sub>32</sub> BBiN <sub>2</sub> Si <sub>2</sub> |
| D <sub>calc</sub>                 | 1.342                                                             | 1.568                                                             |
| $\mu/\text{mm}^{-1}$              | 4.793                                                             | 17.605                                                            |
| Formula Weight                    | 756.76                                                            | 492.37                                                            |
| Colour                            | clear light yellow                                                | clear light yellow                                                |
| Shape                             | plate-shaped                                                      | block                                                             |
| Size/mm <sup>3</sup>              | 0.31×0.29×0.07                                                    | 0.19×0.13×0.12                                                    |
| T/K                               | 123.01(10)                                                        | 123.00(10)                                                        |
| Crystal System                    | monoclinic                                                        | triclinic                                                         |
| Space Group                       | <i>P</i> 2 <sub>1</sub> / <i>c</i>                                | <i>P</i> -1                                                       |
| <i>a</i> /Å                       | 18.0837(3)                                                        | 9.5403(4)                                                         |
| <i>b</i> /Å                       | 10.2928(2)                                                        | 9.8557(6)                                                         |
| <i>c</i> /Å                       | 40.2707(12)                                                       | 12.1971(4)                                                        |
| $\alpha^\circ$                    | 90                                                                | 97.044(4)                                                         |
| $\beta^\circ$                     | 91.900(2)                                                         | 108.604(4)                                                        |
| $\gamma^\circ$                    | 90                                                                | 101.577(4)                                                        |
| V/Å <sup>3</sup>                  | 7491.5(3)                                                         | 1043.07(9)                                                        |
| Z                                 | 8                                                                 | 2                                                                 |
| Z'                                | 2                                                                 | 1                                                                 |
| Wavelength/Å                      | 0.71073                                                           | 1.54184                                                           |
| Radiation type                    | MoK $\alpha$                                                      | CuK $\alpha$                                                      |
| $\theta_{min}^\circ$              | 2.222                                                             | 3.904                                                             |
| $\theta_{max}^\circ$              | 25.123                                                            | 74.073                                                            |
| Measured Refl's.                  | 92561                                                             | 6314                                                              |
| Indep't Refl's                    | 13330                                                             | 3974                                                              |
| Refl's I $\geq$ 2 $\sigma$ (I)    | 11815                                                             | 3703                                                              |
| <i>R</i> <sub>int</sub>           | 0.0581                                                            | 0.0365                                                            |
| Parameters                        | 855                                                               | 190                                                               |
| Restraints                        | 241                                                               | 0                                                                 |
| Largest Peak                      | 0.778                                                             | 1.572                                                             |
| Deepest Hole                      | -1.762                                                            | -2.289                                                            |
| GooF                              | 1.168                                                             | 1.050                                                             |
| <i>wR</i> <sub>2</sub> (all data) | 0.0696                                                            | 0.0919                                                            |
| <i>wR</i> <sub>2</sub>            | 0.0679                                                            | 0.0891                                                            |
| <i>R</i> <sub>I</sub> (all data)  | 0.0436                                                            | 0.0377                                                            |
| <i>R</i> <sub>I</sub>             | 0.0362                                                            | 0.0350                                                            |



Table S2: Crystallographic data for compounds **1c** and **2**.

| Compound                          | <b>1c</b>                                                         | <b>2</b>                                                           |
|-----------------------------------|-------------------------------------------------------------------|--------------------------------------------------------------------|
| CCDC                              | 2340841                                                           | 2340842                                                            |
| Formula                           | C <sub>13</sub> H <sub>30</sub> BBiN <sub>2</sub> Si <sub>2</sub> | C <sub>33</sub> H <sub>56</sub> BiGaN <sub>2</sub> Si <sub>2</sub> |
| Dcalc                             | 1.563                                                             | 1.432                                                              |
| $\mu/\text{mm}^{-1}$              | 17.621                                                            | 10.653                                                             |
| Formula Weight                    | 490.36                                                            | 815.67                                                             |
| Colour                            | brown                                                             | clear colourless                                                   |
| Shape                             | block-shaped                                                      | plate-shaped                                                       |
| Size/mm <sup>3</sup>              | 0.22×0.12×0.10                                                    | 0.50×0.31×0.14                                                     |
| T/K                               | 123(1)                                                            | 122.99(10)                                                         |
| Crystal System                    | triclinic                                                         | orthorhombic                                                       |
| Space Group                       | <i>P</i> -1                                                       | <i>Pbca</i>                                                        |
| <i>a</i> /Å                       | 7.3161(2)                                                         | 19.3792(3)                                                         |
| <i>b</i> /Å                       | 9.8444(2)                                                         | 19.2881(2)                                                         |
| <i>c</i> /Å                       | 15.3209(3)                                                        | 20.2475(2)                                                         |
| $\alpha^\circ$                    | 90.6300(10)                                                       | 90                                                                 |
| $\beta^\circ$                     | 103.624(2)                                                        | 90                                                                 |
| $\gamma^\circ$                    | 103.085(2)                                                        | 90                                                                 |
| V/Å <sup>3</sup>                  | 1042.14(4)                                                        | 7568.27(16)                                                        |
| Z                                 | 2                                                                 | 8                                                                  |
| Z'                                | 1                                                                 | 1                                                                  |
| Wavelength/Å                      | 1.54178                                                           | 1.54184                                                            |
| Radiation type                    | CuK <sub><math>\alpha</math></sub>                                | CuK <sub><math>\alpha</math></sub>                                 |
| $\theta_{min}^\circ$              | 4.622                                                             | 3.902                                                              |
| $\theta_{max}^\circ$              | 66.582                                                            | 73.674                                                             |
| Measured Refl's.                  | 10095                                                             | 26333                                                              |
| Indep't Refl's                    | 3613                                                              | 7278                                                               |
| Refl's I $\geq$ 2 $\sigma$ (I)    | 3417                                                              | 6764                                                               |
| <i>R</i> <sub>int</sub>           | 0.0278                                                            | 0.0513                                                             |
| Parameters                        | 188                                                               | 375                                                                |
| Restraints                        | 0                                                                 | 1                                                                  |
| Largest Peak                      | 0.718                                                             | 1.405                                                              |
| Deepest Hole                      | -0.543                                                            | -1.568                                                             |
| GooF                              | 1.090                                                             | 1.071                                                              |
| <i>wR</i> <sub>2</sub> (all data) | 0.0532                                                            | 0.0929                                                             |
| <i>wR</i> <sub>2</sub>            | 0.0526                                                            | 0.0916                                                             |
| <i>R</i> <sub>1</sub> (all data)  | 0.0221                                                            | 0.0343                                                             |
| <i>R</i> <sub>1</sub>             | 0.0202                                                            | 0.0323                                                             |

## a. Crystal structures

### **IDipp·BH<sub>2</sub>Bi(SiMe<sub>3</sub>)<sub>2</sub> (1a)**

**1a** crystallized by slow evaporation of a *n*-pentane solution at -30 °C as clear light-yellow plate shaped crystals in the monoclinic space group *P*2<sub>1</sub>/*c*. The structure of **1a** is shown in Figure S42.

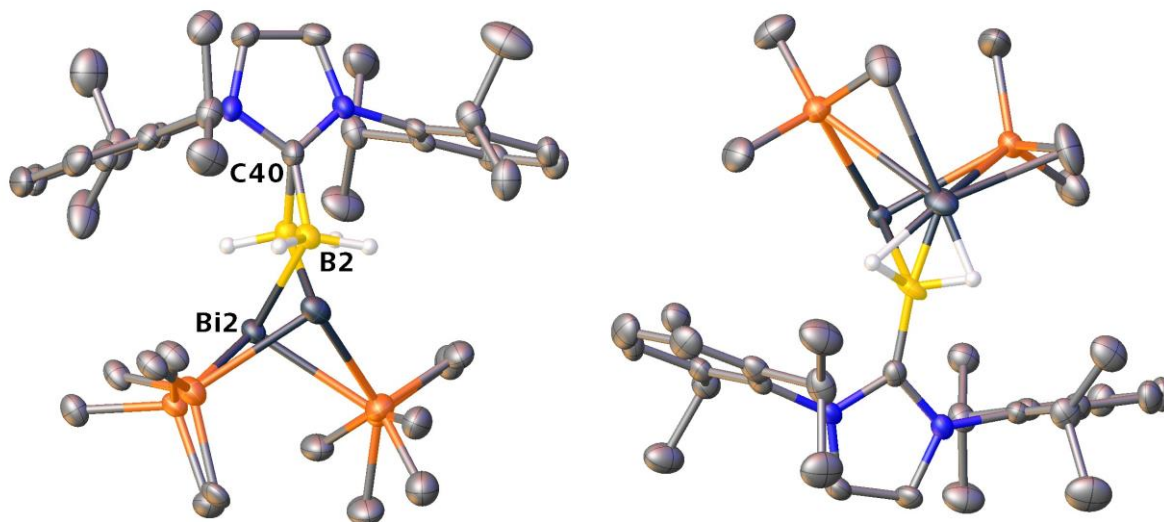

Figure S42: Molecular structure of **1a** in the solid state (asymmetric unit). Anisotropic displacement ellipsoids are shown at 50% probability level. Hydrogen atoms bound to carbon are omitted for clarity. Selected bond lengths [Å] and angles [°]: C40-B2 1.587(7), B2-Bi2 2.424(5), C40-B2-Bi2 110.9(3).

The asymmetric unit contains two molecules of **1a** and had to be refined with further DANG, SADI and SIMU restraints due to disorder (right molecule: only the bismuth atom of the minor component could be located due to a small occupancy of 0.0377(7); left molecule: the chain structure is disordered by rotation of roughly 180° with an occupancy of the minor component of 0.1079(7)). Hydrogen atoms bound to B were fixed in idealized position using DFIX and DANG restraints.

### **IME<sub>4</sub>·BH<sub>2</sub>Bi(SiMe<sub>3</sub>)<sub>2</sub> (1b)**

**1b** crystallized from a saturated *n*-hexane solution at -28 °C as clear light-yellow block-shaped crystals in the triclinic space group *P*-1. The structure of **1b** in the solid state is shown in Figure S43.

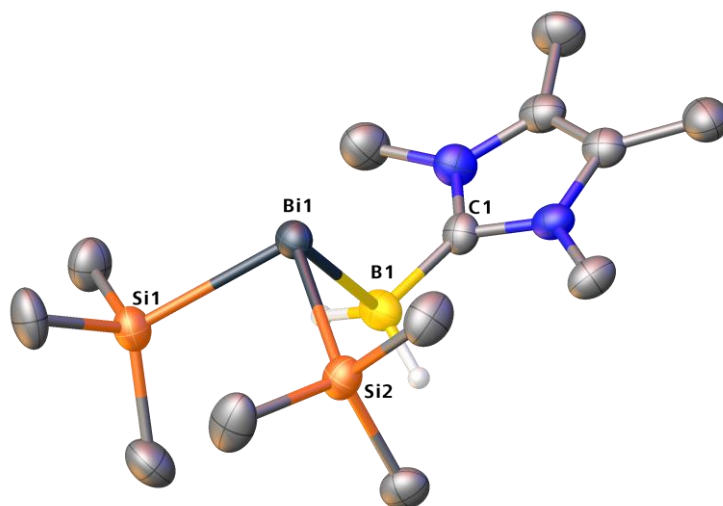

Figure S43: Molecular structure of **1b** in the solid state. Anisotropic displacement ellipsoids are shown at 50% probability level. Hydrogen atoms bound to carbon are omitted for clarity. Selected bond lengths [Å] and angles [°]: C1-B1 1.569(9), B1-Bi1 2.442(7), Bi1-Si1 2.6278(17), Bi1-Si2 2.6452(18), C1-B1-Bi1 107.2(4), B1-Bi1-Si1 89.12(18), B1-Bi1-Si2 97.05(19).

The asymmetric unit contains one molecule of **1b** and was refined without further restrains/constraints. H-atoms bound to B were refined freely.

### DMAP·BH<sub>2</sub>Bi(SiMe<sub>3</sub>)<sub>2</sub> (**1c**)

**1c** crystallized by storing a saturated solution of **1c** in toluene at -28 °C as brown block-shaped crystals in the triclinic space group *P*-1. The structure of **1c** in the solid state is shown in Figure S44.

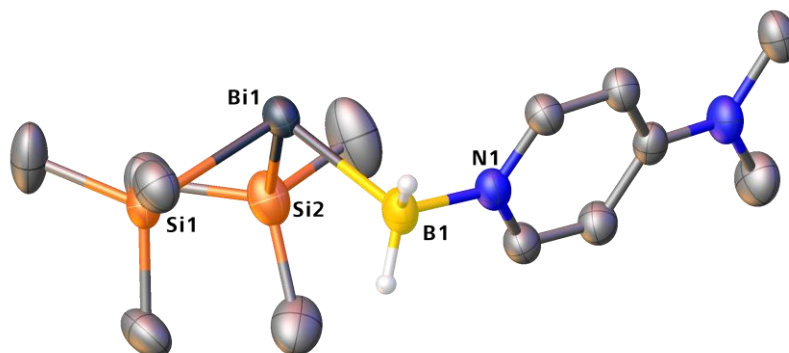

Figure S44: Molecular structure of **1c** in the solid state. Anisotropic displacement ellipsoids are shown at 50% probability level. Hydrogen atoms bound to carbon are omitted for clarity. Selected bond lengths [Å] and angles [°]: N1-B1 1.578(5), B1-Bi1 2.424(5), Bi1-Si1 2.6331(9), Bi1-Si2 2.6322(11), N1-B1-Bi1 106.9(2), B1-Bi1-Si1 94.53(10), B1-Bi1-Si2 100.10(12).

The asymmetric unit contains one molecule of **1c** and was refined without further restrains/constraints. H-atoms bound to B were refined freely.

### IDipp·GaH<sub>2</sub>Bi(SiMe<sub>3</sub>)<sub>2</sub> (**2**)

**2** crystallized by slow evaporation of a *n*-pentane solution under reduced pressure at -80 °C over the course of two days as clear colourless plate-shaped crystals in the orthorhombic space group *Pbca*. The structure of **2** in the solid state is shown in Figure S44.

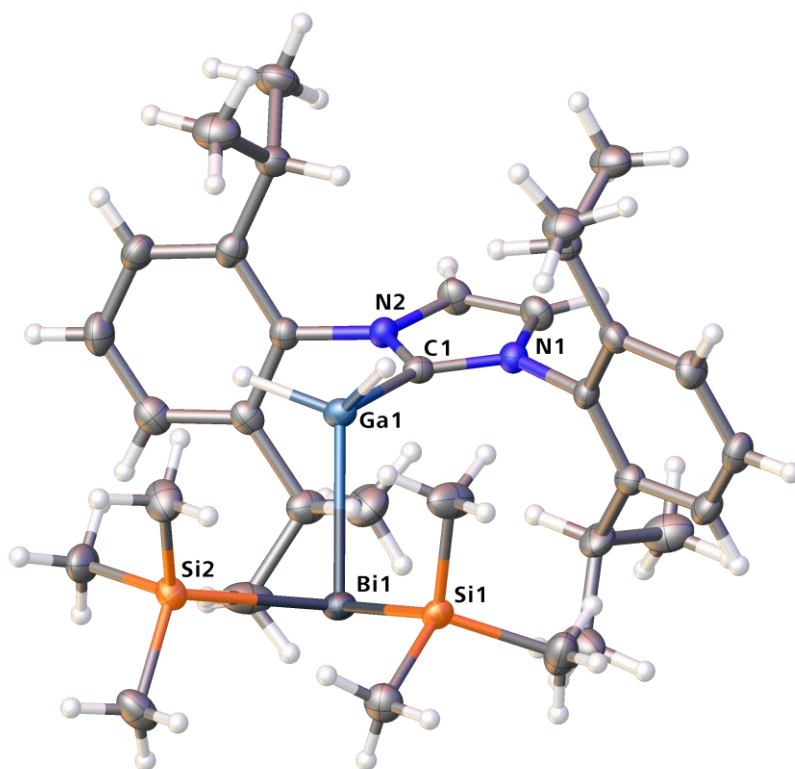

Figure S45: Molecular structure of **2** in the solid state. Anisotropic displacement ellipsoids are shown at 50% probability level. Selected bond lengths [Å] and angles [°]: N1-C1 1.352(4), N2-C1 1.357(4), C1-Ga1 2.061(3), Ga1-Bi1 2.7234(4), Bi1-Si1 2.6487(9), Bi1-Si2 2.6403(9), N1-Bi1-Bi1 106.9(2), N1-C1-N2 104.2(3), N1-C1-Ga1 129.2(2), C1-Ga1-Bi1 110.10(8), Ga1-Bi1-Si1 95.26(2), Bi1-Bi1-Si2 87.85(2).

The asymmetric unit contains one molecule of **2**. H atoms bound to Ga were refined by applying a SADI restraint.

## 6. Computational Details

### a. General Information

The geometries of the compounds have been fully optimized with gradient-corrected density functional theory (DFT) in form of Becke's three-parameter hybrid method B3LYP with def2-TZVP all electron basis set (ECP on Bi).<sup>[8]</sup> The Gaussian 09 programme package was used throughout.<sup>[9]</sup> All structures correspond to minima on their respective potential energy surfaces as verified by computation of second derivatives. Natural bond orbital analysis (NBO Version 3.1, E. D. Glendening, A. E. Reed, J. E. Carpenter, and F. Weinhold) was performed as implemented in Gaussian 09.<sup>[10]</sup>

### b. Molecular Properties and Thermodynamics

Table S3: Reaction energies  $\Delta E$ , standard reaction enthalpies  $\Delta H^\circ_{298}$ , Gibbs energies  $\Delta G^\circ_{298}$  (kJ mol<sup>-1</sup>) and standard reaction entropies  $\Delta S^\circ_{298}$  (J mol<sup>-1</sup> K<sup>-1</sup>) for the considered gas phase processes). B3LYP/def2-TZVP(ECP on Bi) level of theory.

| Process                                                                                                                                 | $\Delta E$ | $\Delta H^\circ_{298}$ | $\Delta S^\circ_{298}$ | $\Delta G^\circ_{298}$ |
|-----------------------------------------------------------------------------------------------------------------------------------------|------------|------------------------|------------------------|------------------------|
| <b>1a</b> = BH <sub>2</sub> Bi(SiMe <sub>3</sub> ) <sub>2</sub> + IDipp                                                                 | 203.8      | 190.3                  | 253.8                  | 114.6                  |
| <b>1b</b> = BH <sub>2</sub> Bi(SiMe <sub>3</sub> ) <sub>2</sub> + IMe <sub>4</sub>                                                      | 233.1      | 219.8                  | 186.9                  | 164.1                  |
| <b>1c</b> = BH <sub>2</sub> Bi(SiMe <sub>3</sub> ) <sub>2</sub> + DMAP                                                                  | 139.7      | 130.2                  | 176.0                  | 77.8                   |
| <b>2</b> = GaH <sub>2</sub> Bi(SiMe <sub>3</sub> ) <sub>2</sub> + IDipp                                                                 | 109.9      | 99.5                   | 242.1                  | 27.4                   |
| <b>1a</b> + 2 MeOH = IDipp·BH <sub>2</sub> BiH <sub>2</sub> + 2MeOSiMe <sub>3</sub>                                                     | -170.6     | -194.3                 | 34.4                   | -204.6                 |
| <b>1b</b> + 2 MeOH = IMe <sub>4</sub> ·BH <sub>2</sub> BiH <sub>2</sub> + 2MeOSiMe <sub>3</sub>                                         | -178.1     | -201.8                 | 13.6                   | -205.8                 |
| <b>1c</b> + 2 MeOH = DMAP·BH <sub>2</sub> BiH <sub>2</sub> + 2MeOSiMe <sub>3</sub>                                                      | -163.9     | -184.4                 | 8.0                    | -186.8                 |
| <b>1a</b> + 2 MeOH = IDipp·BH <sub>2</sub> Bi(OMe) <sub>2</sub> + 2 HSiMe <sub>3</sub>                                                  | -4.2       | -24.0                  | 5.5                    | -25.7                  |
| <b>1b</b> + 2 MeOH = IMe <sub>4</sub> ·BH <sub>2</sub> Bi(OMe) <sub>2</sub> + 2 HSiMe <sub>3</sub>                                      | -25.5      | -44.7                  | -14.1                  | -40.5                  |
| <b>1c</b> + 2 MeOH = DMAP·BH <sub>2</sub> Bi(OMe) <sub>2</sub> + 2 HSiMe <sub>3</sub>                                                   | -15.3      | -31.8                  | -5.8                   | -30.1                  |
| IDipp·BH <sub>2</sub> BiH <sub>2</sub> = 2 H <sub>2</sub> + Bi <sub>(solid)</sub> + B <sub>(solid)</sub> + IDipp                        |            | -8.9                   | 239.5                  | -80.3                  |
| IMe <sub>4</sub> ·BH <sub>2</sub> BiH <sub>2</sub> = 2 H <sub>2</sub> + Bi <sub>(solid)</sub> + B <sub>(solid)</sub> + IMe <sub>4</sub> |            | 28.1                   | 193.3                  | -29.6                  |
| DMAP·BH <sub>2</sub> BiH <sub>2</sub> = 2 H <sub>2</sub> + Bi <sub>(solid)</sub> + B <sub>(solid)</sub> + DMAP                          |            | -78.9                  | 188.0                  | -135.0                 |
| IDipp·BH <sub>2</sub> BiH <sub>2</sub> = ½ H <sub>2</sub> + Bi <sub>(solid)</sub> + IDipp·BH <sub>3</sub>                               |            | -131.4                 | 64.6                   | -150.7                 |
| IMe <sub>4</sub> ·BH <sub>2</sub> BiH <sub>2</sub> = ½ H <sub>2</sub> + Bi <sub>(solid)</sub> + IMe·BH <sub>3</sub>                     |            | -105.2                 | 46.7                   | -119.1                 |
| DMAP·BH <sub>2</sub> BiH <sub>2</sub> = ½ H <sub>2</sub> + Bi <sub>(solid)</sub> + DMAP·BH <sub>3</sub>                                 |            | -128.7                 | 51.7                   | -144.1                 |
| B <sub>(solid)</sub> = B <sub>(gas)</sub> <sup>[11]</sup>                                                                               |            | 561.6                  | 147.5                  | 517.6                  |
| Bi <sub>(solid)</sub> = Bi <sub>(gas)</sub> <sup>[11]</sup>                                                                             |            | 208.4                  | 130.0                  | 169.6                  |

Table S4: Total energies  $E^0$ , sum of electronic and thermal enthalpies  $H^0_{298}$  (Hartree) and standard entropies  $S^0_{298}$  (cal mol<sup>-1</sup>K<sup>-1</sup>). B3LYP/def2-TZVP (ECP on Bi) level of theory.

| <b>Compound</b>                                        | $E^0$         | $H^0_{298}$  | $S^0_{298}$ |
|--------------------------------------------------------|---------------|--------------|-------------|
| DMAP                                                   | -382.4014129  | -382.230446  | 91.131      |
| IMe <sub>4</sub>                                       | -383.5797905  | -383.386841  | 96.208      |
| IDipp                                                  | -1160.4538534 | -1159.854780 | 201.957     |
| BH <sub>2</sub> Bi(SiMe <sub>3</sub> ) <sub>2</sub>    | -1059.4617525 | -1059.198250 | 152.893     |
| GaH <sub>2</sub> Bi(SiMe <sub>3</sub> ) <sub>2</sub>   | -2959.5435301 | -2959.285449 | 157.331     |
| <b>1a</b>                                              | -2219.9932453 | -2219.125522 | 294.179     |
| <b>1b</b>                                              | -1443.1303448 | -1442.668822 | 204.426     |
| <b>1c</b>                                              | -1441.9163855 | -1441.478291 | 201.97      |
| <b>2</b>                                               | -4120.0392468 | -4119.178145 | 301.431     |
| Bi ( <sup>4</sup> S <sub>3/2</sub> )                   | -214.6848603  | -214.6825    | 44.67       |
| B ( <sup>2</sup> P <sub>1/2</sub> )                    | -24.6639213   | -24.661561   | 34.519      |
| H <sub>2</sub>                                         | -1.1794826    | -1.166608    | 31.223      |
| HSi(CH <sub>3</sub> ) <sub>3</sub>                     | -409.9478771  | -409.821002  | 79.024      |
| CH <sub>3</sub> OH                                     | -115.7756771  | -115.72035   | 56.963      |
| CH <sub>3</sub> OSi(CH <sub>3</sub> ) <sub>3</sub>     | -524.5731799  | -524.409144  | 98.141      |
| DMAP·BH <sub>2</sub> BiH <sub>2</sub>                  | -624.3838154  | -624.170929  | 121.523     |
| DMAP·BH <sub>2</sub> Bi(OMe) <sub>2</sub>              | -853.577813   | -853.289115  | 156.463     |
| IDipp·BH <sub>2</sub> BiH <sub>2</sub>                 | -1402.46322   | -1401.821945 | 220.033     |
| IDipp·BH <sub>2</sub> Bi(OMe) <sub>2</sub>             | -1631.650437  | -1630.933371 | 251.378     |
| IMe <sub>4</sub> ·BH <sub>2</sub> BiH <sub>2</sub>     | -625.60319    | -625.368077  | 125.327     |
| IMe <sub>4</sub> ·BH <sub>2</sub> Bi(OMe) <sub>2</sub> | -854.7956626  | -854.484536  | 156.93      |
| DMAP·BH <sub>3</sub>                                   | -409.0805685  | -408.874761  | 104.676     |
| IDipp·BH <sub>3</sub>                                  | -1187.160529  | -1186.526817 | 206.272     |
| IMe <sub>4</sub> ·BH <sub>3</sub>                      | -410.2905744  | -410.062966  | 107.271     |

Table S5: Dipole moments  $\mu$  in Debye, the E-Bi and E-LB bond distances in Å, the E-Bi and E-LB Wiberg bond indices (WBI) and their changes upon complex formation. B3LYP/def2-TZVP(ECP on Bi) level of theory.

| Compound                                 | $\mu$ | $R(\text{E-Bi})$ | $\Delta R(\text{E-Bi})$ | WBI(E-Bi) | $\Delta \text{WBI}(\text{E-Bi})$ |
|------------------------------------------|-------|------------------|-------------------------|-----------|----------------------------------|
| $\text{BH}_2\text{Bi}(\text{SiMe}_3)_2$  | 1.51  | 2.291            | -                       | 1.208     | -                                |
| $\text{GaH}_2\text{Bi}(\text{SiMe}_3)_2$ | 1.64  | 2.688            | -                       | 0.979     | -                                |
| <b>1a</b>                                | 6.61  | 2.484            | 0.193                   | 0.845     | -0.364                           |
| <b>1b</b>                                | 7.62  | 2.501            | 0.210                   | 0.841     | -0.367                           |
| <b>1c</b>                                | 10.9  | 2.463            | 0.172                   | 0.890     | -0.318                           |
| <b>2</b>                                 | 7.69  | 2.785            | 0.097                   | 0.880     | -0.099                           |

Table S6: Selected results from NBO analysis. B3LYP/def2-TZVP(ECP on Bi) level of theory.

| Compound                                                        | Orbital       | Occupation | Contribution         | Bi configuration                                                | B/Ga                                                                       |
|-----------------------------------------------------------------|---------------|------------|----------------------|-----------------------------------------------------------------|----------------------------------------------------------------------------|
| $\text{BH}_2\text{Bi}(\text{SiMe}_3)_2$                         | Bi-B bonding  | 1.9712     | 51.67% Bi, 48.33% B  | $\text{sp}^{8.48}\text{d}^{0.01}$<br>(s – 10.54%<br>p – 89.35%) | $\text{sp}^{2.20}$<br>(s 31.25%,<br>p 68.69%)                              |
|                                                                 | Bi LP         | 1.9098     |                      | $\text{sp}^{0.32}\text{d}^{0.0}$<br>(s – 75.49%<br>p – 24.49%)  |                                                                            |
|                                                                 | B LP* vacant  | 0.1687     |                      |                                                                 | $\text{sp}^{99.99}$<br>(s 0.29 %,<br>p 99.38 %)                            |
| IDipp· $\text{BH}_2\text{Bi}(\text{SiMe}_3)_2$<br>( <b>1a</b> ) | Bi-B bonding  | 1.8367     | 53.82% Bi, 46.18% B  | $\text{sp}^{9.68}\text{d}^{0.01}$<br>(s – 9.36%<br>p – 90.57%)  | $\text{sp}^{5.16}$<br>(s 16.23%, p<br>83.74%)                              |
|                                                                 | Bi LP         | 1.9646     |                      | $\text{sp}^{0.32}\text{d}^{0.0}$<br>(s – 75.93%<br>p – 24.06%)  |                                                                            |
| $\text{GaH}_2\text{Bi}(\text{SiMe}_3)_2$                        | Bi-Ga bonding | 1.9193     | 60.3% Bi, 39.68% Ga  | $\text{sp}^{12.91}\text{d}^{0.01}$<br>(s – 7.18%<br>p – 92.72%) | $\text{sp}^{2.13}$<br>(s 31.92%,<br>p 67.94%)                              |
|                                                                 | Bi LP         | 1.9415     |                      | $\text{sp}^{0.28}\text{d}^{0.0}$<br>(s – 78.11%<br>p – 21.87%)  |                                                                            |
|                                                                 | Ga LP* vacant | 0.0829     |                      |                                                                 | $\text{sp}^{99.99}\text{d}^{6.78}$<br>(s 0.19 %,<br>p 98.49 %<br>d 1.27 %) |
| IDipp· $\text{GaH}_2\text{Bi}(\text{SiMe}_3)_2$<br>( <b>2</b> ) | Bi-Ga bonding | 1.9206     | 62.49% Bi, 37.51% Ga | $\text{sp}^{9.19}\text{d}^{0.01}$<br>(s – 9.80%<br>p – 90.11%)  | $\text{sp}^{2.75}$<br>(s 26.65%,<br>p 73.29%)                              |
|                                                                 | Bi LP         | 1.9599     |                      | $\text{sp}^{0.33}\text{d}^{0.0}$<br>(s – 74.9%<br>p – 25.1%)    |                                                                            |
|                                                                 | Ga LP* vacant | 0.3509     |                      |                                                                 | $\text{sp}^{13.84}\text{d}^{0.03}$<br>(s 6.72 %,<br>p 93.07 %<br>d 0.20 %) |

## Discussion of the results of the NBO analysis

In  $\text{BH}_2\text{Bi}(\text{SiMe}_3)_2$ , the Bi lone pair has predominantly  $s$ -character (75.5 %), occupation 1.91  $\bar{e}$  and donates electron density to a vacant orbital of boron (99.4%  $p$  character), the  $E(2)$  value 3.75 kcal mol $^{-1}$ . The same Bi lone pair also donates to each of two antibonding orbitals of neighbouring Si-C bonds ( $E(2)$  values 2.82 and 2.91 kcal mol $^{-1}$ ). Overall, these data indicate weak involvement of Bi lone pair into the interaction with boron centre (occupation of the vacant B orbital 0.17  $\bar{e}$ ).

In analogous gallium compound  $\text{GaH}_2\text{Bi}(\text{SiMe}_3)_2$ , the Bi lone pair also has predominantly  $s$ -character (78 %), occupation 1.94  $\bar{e}$  and donates electron density to a vacant orbital of gallium (98.5%  $p$  character), the  $E(2)$  value is 1.59 kcal mol $^{-1}$ . The same Bi lone pair also donates to each of two antibonding orbitals of neighbouring Si-C bonds (both  $E(2)$  values 1.37 kcal mol $^{-1}$ ).

Overall, these data indicate much weaker involvement of Bi lone pair into the interaction with gallium centre than with the boron centre ( $E(2)$  values are 1.59 and 3.75 kcal mol $^{-1}$ , for Ga and B, respectively). It should be noted that the total occupation of the vacant Ga orbital (0.08  $\bar{e}$ ) is smaller compared to 0.17  $\bar{e}$  for vacant boron orbital.

In comparison, for  $\text{IDipp}\cdot\text{GaH}_2\text{Bi}(\text{SiMe}_3)_2$ , the strong donation from the carbon lone pair to the Ga vacant orbital with  $E(2)$  value of 160.96 kcal mol $^{-1}$  is the evidence of strong C-Ga donor-acceptor bond, occupation of vacant Ga orbital is 0.35  $\bar{e}$ . According to NBO analysis, the Bi lone pair (occupation 1.96) does not interact with vacant orbital on Ga after it complexed with NHC.

For  $\text{IDipp}\cdot\text{BH}_2\text{Bi}(\text{SiMe}_3)_2$ , the NBO analysis does not identify the boron vacant orbital, due the strong covalent C-B bond (occupation 1.9665  $\bar{e}$ ).

Thus, a weak  $\pi$  interaction between Bi-B exist in  $\text{BH}_2\text{Bi}(\text{SiMe}_3)_2$  and a much weaker  $\pi$  interaction Bi-Ga can be identified in  $\text{GaH}_2\text{Bi}(\text{SiMe}_3)_2$ , while after complexation with IDipp  $\pi$ -interactions are absent both in  $\text{IDipp}\cdot\text{BH}_2\text{Bi}(\text{SiMe}_3)_2$  and  $\text{IDipp}\cdot\text{GaH}_2\text{Bi}(\text{SiMe}_3)_2$ . Note that after the coordination of the NHC, both boron and gallium atoms change initial  $sp^2$  hybridization ( $sp^{2.2}$  for B,  $sp^{2.13}$  for Ga) to  $sp^{5.2}$  for B, and  $sp^{2.75}$  for Ga.

### c. Frontier Molecular Orbitals

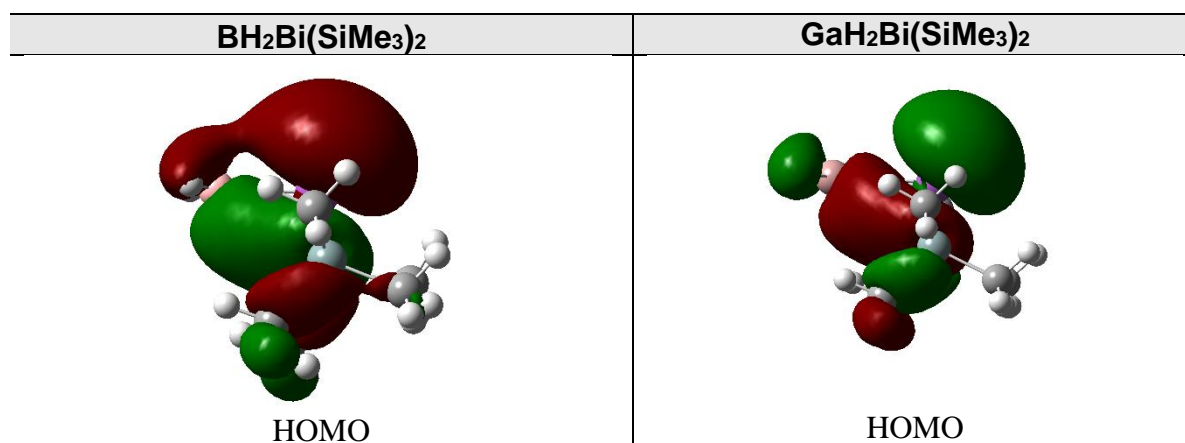



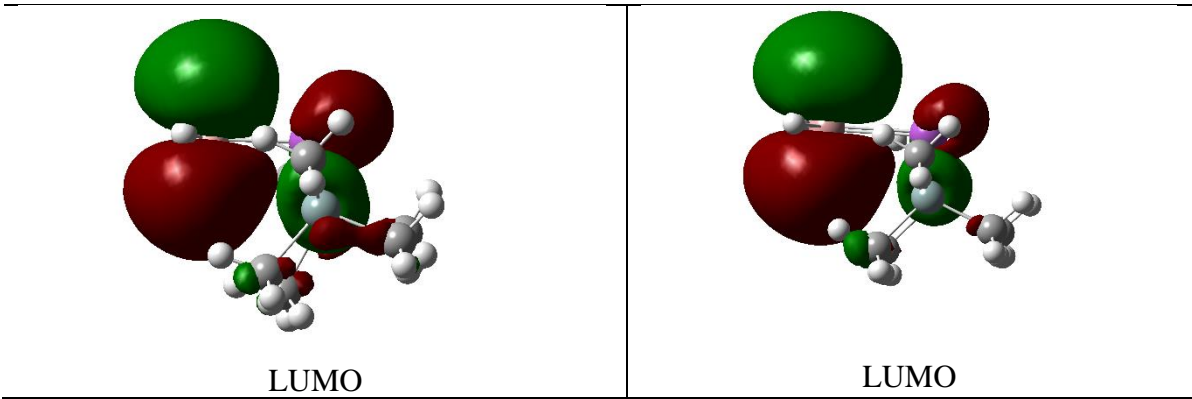

|           |          |
|-----------|----------|
| <b>1a</b> | <b>2</b> |
|-----------|----------|

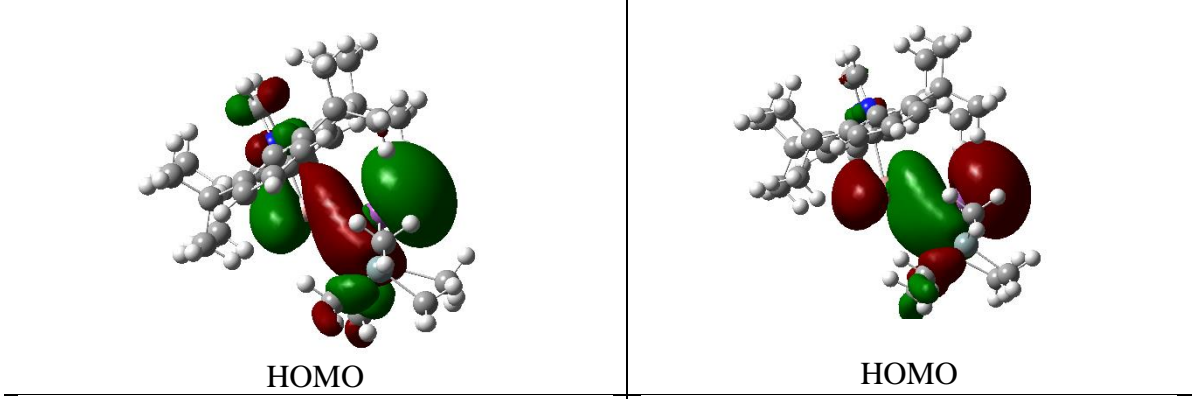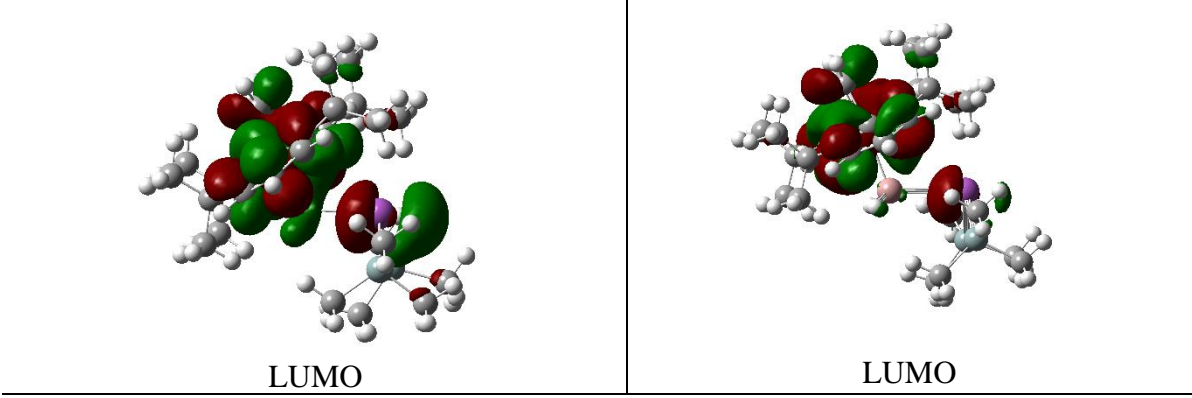

|           |           |
|-----------|-----------|
| <b>1b</b> | <b>1c</b> |
|-----------|-----------|

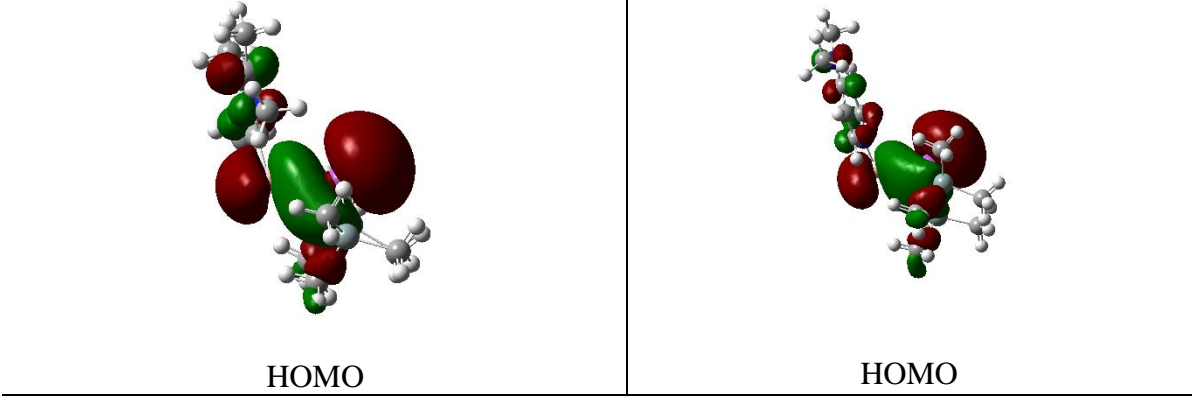

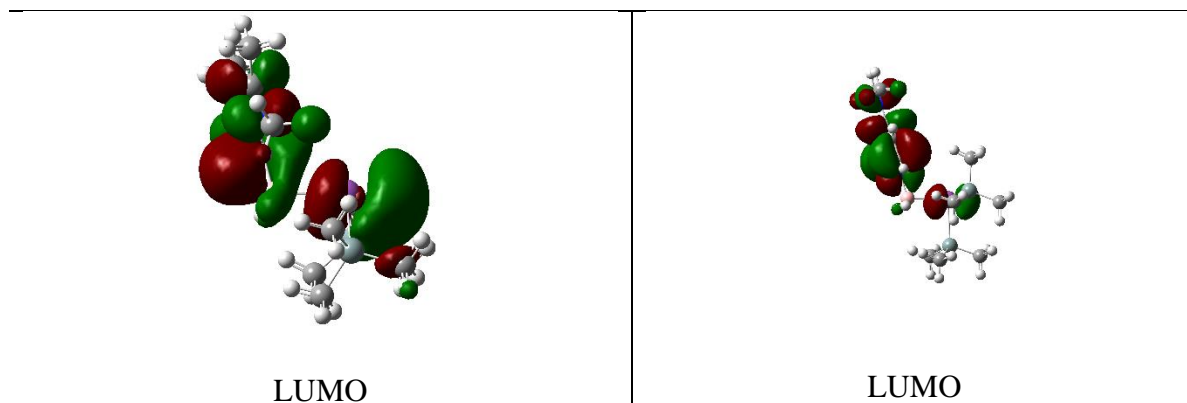

Figure S46: Canonical frontier molecular orbitals of the studied compounds. B3LYP/def2-TZVP (ECP on Bi) level of theory.

#### d. Cartesian Coordinates of optimized Structures

Table S7: Optimized geometries of the computationally studied compounds. Cartesian coordinates in Ångströms. B3LYP/def2-TZVP (ECP on Bi) level of theory.

|                        |              |              |              |
|------------------------|--------------|--------------|--------------|
| <b>DMAP</b>            |              |              |              |
| 7                      | -2.664387000 | 0.000007000  | 0.020859000  |
| 7                      | 1.550059000  | -0.000004000 | -0.087102000 |
| 6                      | 0.178850000  | -0.000008000 | -0.039012000 |
| 6                      | -0.570648000 | -1.193118000 | -0.015110000 |
| 1                      | -0.092052000 | -2.160779000 | -0.014376000 |
| 6                      | -0.570626000 | 1.193101000  | -0.015123000 |
| 1                      | -0.092027000 | 2.160762000  | -0.014397000 |
| 6                      | -1.953416000 | -1.129170000 | 0.010031000  |
| 1                      | -2.524007000 | -2.053033000 | 0.025352000  |
| 6                      | 2.278814000  | 1.248571000  | 0.032671000  |
| 1                      | 1.981164000  | 1.955653000  | -0.745288000 |
| 1                      | 3.341646000  | 1.053004000  | -0.088174000 |
| 1                      | 2.127967000  | 1.731534000  | 1.006166000  |
| 6                      | 2.278866000  | -1.248554000 | 0.032638000  |
| 1                      | 2.128115000  | -1.731511000 | 1.006152000  |
| 1                      | 3.341679000  | -1.052948000 | -0.088300000 |
| 1                      | 1.981188000  | -1.955655000 | -0.745289000 |
| 6                      | -1.953407000 | 1.129163000  | 0.009993000  |
| 1                      | -2.523974000 | 2.053042000  | 0.025331000  |
| <b>IMe<sub>4</sub></b> |              |              |              |
| 7                      | 1.058721000  | -0.707717000 | -0.000052000 |
| 7                      | -1.058756000 | -0.707680000 | 0.000000000  |
| 6                      | 0.679300000  | 0.636539000  | 0.000006000  |
| 6                      | -0.000044000 | -1.561853000 | -0.000050000 |
| 6                      | -0.679261000 | 0.636577000  | 0.000033000  |
| 6                      | -1.655840000 | 1.760614000  | 0.000062000  |
| 1                      | -2.304963000 | 1.737906000  | -0.880115000 |
| 1                      | -1.135980000 | 2.718010000  | -0.000517000 |
| 1                      | -2.304203000 | 1.738583000  | 0.880824000  |
| 6                      | 2.431331000  | -1.171720000 | 0.000087000  |
| 1                      | 2.966486000  | -0.825041000 | -0.886935000 |
| 1                      | 2.406417000  | -2.257832000 | 0.000161000  |
| 1                      | 2.966353000  | -0.824873000 | 0.887114000  |
| 6                      | -2.431373000 | -1.171667000 | -0.000026000 |
| 1                      | -2.406491000 | -2.257785000 | 0.000021000  |
| 1                      | -2.966428000 | -0.824940000 | -0.887085000 |
| 1                      | -2.966487000 | -0.824864000 | 0.886967000  |
| 6                      | 1.655912000  | 1.760560000  | -0.000070000 |
| 1                      | 2.304175000  | 1.738714000  | 0.880772000  |
| 1                      | 1.136071000  | 2.717965000  | -0.000936000 |
| 1                      | 2.305141000  | 1.737636000  | -0.880162000 |
| <b>IDipp</b>           |              |              |              |
| 7                      | -1.062433000 | -0.000212000 | 0.517841000  |
| 7                      | 1.062454000  | -0.000280000 | 0.517849000  |
| 6                      | 0.000014000  | 0.000056000  | -0.342234000 |
| 6                      | 2.435803000  | -0.000119000 | 0.090083000  |
| 6                      | -2.435780000 | 0.000031000  | 0.090065000  |
| 6                      | 0.674932000  | -0.000753000 | 1.853545000  |
| 1                      | 1.379330000  | -0.001039000 | 2.666612000  |
| 6                      | -0.674922000 | -0.000632000 | 1.853539000  |
| 1                      | -1.379327000 | -0.000814000 | 2.666601000  |
| 6                      | 3.085112000  | -1.228217000 | -0.111543000 |
| 6                      | -3.085203000 | -1.228019000 | -0.111480000 |
| 6                      | -3.084628000 | 1.228314000  | -0.111866000 |
| 6                      | -2.381093000 | -2.563361000 | 0.075298000  |
| 1                      | -1.394840000 | -2.364457000 | 0.492766000  |
| 6                      | 3.084766000  | 1.228118000  | -0.111753000 |
| 6                      | -4.415996000 | -1.199657000 | -0.527711000 |
| 1                      | -4.940552000 | -2.131324000 | -0.697703000 |
| 6                      | -5.077330000 | 0.000517000  | -0.734708000 |
| 1                      | -6.110261000 | 0.000711000  | -1.060472000 |
| 6                      | -4.415425000 | 1.200441000  | -0.528121000 |
| 1                      | -4.939541000 | 2.132307000  | -0.698421000 |
| 6                      | -2.380115000 | 2.563426000  | 0.074960000  |
| 1                      | -1.393617000 | 2.364152000  | 0.491658000  |
| 6                      | 2.380838000  | -2.563492000 | 0.075097000  |
| 1                      | 1.394747000  | -2.364530000 | 0.492922000  |
| 6                      | 4.415910000  | -1.199950000 | -0.527761000 |
| 1                      | 4.940385000  | -2.131651000 | -0.697814000 |
| 6                      | 2.380387000  | 2.563287000  | 0.075167000  |
| 1                      | 1.393834000  | 2.364081000  | 0.491766000  |
| 6                      | 5.077357000  | 0.000178000  | -0.734668000 |
| 1                      | 6.110292000  | 0.000298000  | -1.060423000 |
| 6                      | 4.415565000  | 1.200150000  | -0.528000000 |
| 1                      | 4.939772000  | 2.131978000  | -0.698225000 |
| 6                      | -3.118372000 | -3.476164000 | 1.065973000  |
| 1                      | -3.245495000 | -2.990985000 | 2.035635000  |
| 1                      | -2.553854000 | -4.398309000 | 1.220872000  |
| 1                      | -4.109001000 | -3.755087000 | 0.701175000  |
| 6                      | -2.166931000 | -3.265346000 | -1.274824000 |
| 1                      | -3.119796000 | -3.508481000 | -1.750746000 |
| 1                      | -1.615644000 | -4.198288000 | -1.135832000 |
| 1                      | -1.599191000 | -2.631234000 | -1.956427000 |
| 6                      | 2.166153000  | -3.265043000 | -1.275172000 |
| 1                      | 1.598303000  | -2.630639000 | -1.956411000 |
| 1                      | 1.614771000  | -4.197947000 | -1.136293000 |
| 1                      | 3.118847000  | -3.508169000 | -1.751443000 |
| 6                      | 3.118233000  | -3.476719000 | 1.065286000  |
| 1                      | 4.108667000  | -3.755811000 | 0.700088000  |
| 1                      | 2.535359000  | -4.398763000 | 1.220140000  |
| 1                      | 3.245805000  | -2.991821000 | 2.035030000  |
| 6                      | 2.167166000  | 3.266116000  | -1.274636000 |
| 1                      | 3.120312000  | 3.509567000  | -1.749827000 |
| 1                      | 1.615798000  | 4.198973000  | -1.135410000 |
| 1                      | 1.599859000  | 2.632440000  | -1.957010000 |

---

|   |              |             |              |
|---|--------------|-------------|--------------|
| 6 | -2.166707000 | 3.266069000 | -1.274911000 |
| 1 | -1.599409000 | 2.632249000 | -1.957158000 |
| 1 | -1.615255000 | 4.198886000 | -1.135752000 |
| 1 | -3.119789000 | 3.509558000 | -1.750211000 |
| 6 | -3.116700000 | 3.475804000 | 1.066580000  |
| 1 | -4.107629000 | 3.754729000 | 0.702587000  |
| 1 | -2.552150000 | 4.397934000 | 1.221440000  |
| 1 | -3.243080000 | 2.990214000 | 2.036131000  |
| 6 | 3.117003000  | 3.475466000 | 1.066950000  |
| 1 | 3.243232000  | 2.989758000 | 2.036461000  |
| 1 | 2.552561000  | 4.397655000 | 1.221855000  |
| 1 | 4.108002000  | 3.754295000 | 0.703073000  |

---

### BH<sub>2</sub>Bi(SiMe<sub>3</sub>)<sub>2</sub>

|    |              |              |              |
|----|--------------|--------------|--------------|
| 83 | -0.002005000 | -0.842442000 | -0.281012000 |
| 14 | 2.143182000  | 0.756132000  | 0.081801000  |
| 14 | -2.139361000 | 0.765344000  | 0.079266000  |
| 5  | -0.025012000 | -1.730894000 | 1.831002000  |
| 6  | 3.612625000  | -0.383956000 | 0.394127000  |
| 1  | 3.755399000  | -1.085611000 | -0.430029000 |
| 1  | 3.480492000  | -0.964611000 | 1.308907000  |
| 1  | 4.531038000  | 0.202042000  | 0.498447000  |
| 6  | 1.985881000  | 1.975008000  | 1.514032000  |
| 1  | 1.803127000  | 1.462275000  | 2.459817000  |
| 1  | 1.172525000  | 2.684840000  | 1.354118000  |
| 1  | 2.911961000  | 2.549962000  | 1.615895000  |
| 6  | -3.658627000 | -0.343099000 | -0.063274000 |
| 1  | -3.658370000 | -1.120841000 | 0.702982000  |
| 1  | -3.703860000 | -0.833371000 | -1.037642000 |
| 1  | -4.572432000 | 0.246530000  | 0.059385000  |
| 6  | 2.423557000  | 1.720616000  | -1.516209000 |
| 1  | 3.317501000  | 2.346296000  | -1.431855000 |
| 1  | 1.579890000  | 2.375194000  | -1.744258000 |
| 1  | 2.563005000  | 1.049505000  | -2.365968000 |
| 6  | -2.162591000 | 1.638769000  | 1.750685000  |
| 1  | -1.282613000 | 2.268360000  | 1.890707000  |
| 1  | -2.191510000 | 0.918529000  | 2.570375000  |
| 1  | -3.048797000 | 2.276361000  | 1.831340000  |
| 6  | -2.168970000 | 2.051884000  | -1.301857000 |
| 1  | -3.069313000 | 2.669292000  | -1.224620000 |
| 1  | -2.170353000 | 1.580055000  | -2.286390000 |
| 1  | -1.305521000 | 2.718163000  | -1.252324000 |
| 1  | 0.994368000  | -2.007128000 | 2.381649000  |
| 1  | -1.059843000 | -2.014723000 | 2.348495000  |

---

### GaH<sub>2</sub>Bi(SiMe<sub>3</sub>)<sub>2</sub>

|    |              |              |              |
|----|--------------|--------------|--------------|
| 83 | -0.000031000 | -0.152184000 | -0.862241000 |
| 14 | 2.111107000  | 0.943210000  | 0.427436000  |
| 14 | -2.111313000 | 0.942877000  | 0.427520000  |
| 31 | 0.000364000  | -2.384629000 | 0.635269000  |
| 6  | 3.648165000  | 0.157680000  | -0.334777000 |
| 1  | 3.692132000  | 0.330294000  | -1.411975000 |
| 1  | 3.672621000  | -0.920744000 | -0.166450000 |
| 1  | 4.551555000  | 0.586041000  | 0.110483000  |
| 6  | 2.151060000  | 0.670141000  | 2.295281000  |
| 1  | 2.224543000  | -0.390811000 | 2.541672000  |
| 1  | 1.263340000  | 1.070947000  | 2.787042000  |
| 1  | 3.024481000  | 1.170970000  | 2.725340000  |
| 6  | -3.648033000 | 0.157709000  | -0.335771000 |
| 1  | -3.671608000 | -0.921048000 | -0.169451000 |
| 1  | -3.692422000 | 0.332275000  | -1.412638000 |
| 1  | -4.551622000 | 0.584541000  | 0.110543000  |
| 6  | 2.134421000  | 2.799735000  | 0.083026000  |
| 1  | 3.040776000  | 3.246149000  | 0.504122000  |
| 1  | 1.277273000  | 3.306564000  | 0.529977000  |
| 1  | 2.125199000  | 3.009689000  | -0.988250000 |
| 6  | -2.151714000 | 0.668590000  | 2.295171000  |
| 1  | -1.264375000 | 1.069777000  | 2.787307000  |
| 1  | -2.224581000 | -0.392523000 | 2.541004000  |
| 1  | -3.025588000 | 1.168636000  | 2.725233000  |
| 6  | -2.134668000 | 2.799665000  | 0.084535000  |
| 1  | -3.043439000 | 3.244816000  | 0.501727000  |
| 1  | -2.120456000 | 3.010700000  | -0.986466000 |
| 1  | -1.280153000 | 3.306834000  | 0.536153000  |
| 1  | 1.352042000  | -3.091638000 | 1.057199000  |
| 1  | -1.350950000 | -3.093061000 | 1.055878000  |

---

### 1a

---

|    |              |              |              |
|----|--------------|--------------|--------------|
| 83 | 0.607590000  | 1.771163000  | 0.507854000  |
| 7  | 0.275022000  | -2.464525000 | 0.376229000  |
| 7  | -1.772611000 | -1.771262000 | 0.403114000  |
| 6  | -0.516980000 | -1.416110000 | -0.012502000 |
| 6  | -3.000654000 | -1.034298000 | 0.221971000  |
| 6  | 1.700731000  | -2.593511000 | 0.194580000  |
| 6  | -1.754421000 | -3.014606000 | 1.014408000  |
| 1  | -2.648893000 | -3.472206000 | 1.393868000  |
| 6  | -0.479389000 | -3.446336000 | 0.997049000  |
| 1  | -0.038093000 | -4.354238000 | 1.363648000  |
| 6  | -3.502398000 | -0.287901000 | 1.301301000  |
| 6  | 2.537993000  | -2.353550000 | 1.296900000  |
| 6  | 2.193255000  | -3.027728000 | -1.047395000 |
| 6  | 2.008684000  | -1.960726000 | 2.670209000  |
| 1  | 0.953989000  | -1.705192000 | 2.566245000  |
| 6  | -3.694129000 | -1.164589000 | -0.992112000 |
| 6  | 3.908896000  | -2.538520000 | 1.115623000  |
| 1  | 4.583101000  | -2.359674000 | 1.942653000  |
| 6  | 4.423126000  | -2.944147000 | -0.104475000 |
| 1  | 5.491439000  | -3.074660000 | -0.224221000 |
| 6  | 3.572201000  | -3.188688000 | -1.170914000 |
| 1  | 3.986672000  | -3.516260000 | -2.115032000 |
| 6  | 1.282356000  | -3.385032000 | -2.212939000 |
| 1  | 0.293182000  | -2.982600000 | -2.000653000 |
| 6  | -2.780657000 | -0.183562000 | 2.638735000  |
| 1  | -1.755730000 | -0.527158000 | 2.494954000  |
| 6  | -4.735932000 | 0.340110000  | 1.130098000  |
| 1  | -5.151500000 | 0.924258000  | 1.940096000  |
| 6  | -3.187069000 | -2.018380000 | -2.144786000 |
| 1  | -2.161224000 | -2.308769000 | -1.922784000 |
| 6  | -5.437209000 | 0.234451000  | -0.059464000 |
| 1  | -6.390797000 | 0.735290000  | -0.170995000 |
| 6  | -4.919073000 | -0.509107000 | -1.107450000 |
| 1  | -5.477923000 | -0.890707000 | -2.030714000 |
| 6  | 2.104666000  | -3.143638000 | 3.649882000  |
| 1  | 1.573338000  | -4.022588000 | 3.280733000  |
| 1  | 1.675819000  | -2.872106000 | 4.616913000  |
| 1  | 3.145185000  | -3.432108000 | 3.813882000  |
| 6  | 2.710427000  | -0.726031000 | 3.251388000  |
| 1  | 3.771299000  | -0.907793000 | 3.433453000  |
| 1  | 2.255137000  | -0.458265000 | 4.207094000  |
| 1  | 2.618866000  | 0.132280000  | 2.586664000  |
| 6  | -2.696691000 | 1.256731000  | 3.161378000  |
| 1  | -2.230407000 | 1.918100000  | 2.432151000  |
| 1  | -2.092252000 | 1.285714000  | 4.070050000  |
| 1  | -3.680989000 | 1.658111000  | 3.410178000  |
| 6  | -3.437218000 | -1.094395000 | 3.691107000  |
| 1  | -4.465178000 | -0.782656000 | 3.889388000  |
| 1  | -2.885136000 | -1.046998000 | 4.632288000  |
| 1  | -3.463642000 | -2.136640000 | 3.369487000  |
| 6  | -3.153220000 | -1.250164000 | -3.473166000 |
| 1  | -4.155091000 | -0.974236000 | -3.808128000 |
| 1  | -2.708022000 | -1.872242000 | -4.252529000 |
| 1  | -2.557757000 | -0.341956000 | -3.383932000 |
| 6  | 1.735770000  | -2.761956000 | -3.539343000 |
| 1  | 1.823625000  | -1.679297000 | -3.454134000 |
| 1  | 1.004960000  | -2.980708000 | -4.320697000 |
| 1  | 2.696006000  | -3.160912000 | -3.872389000 |
| 5  | -0.106740000 | -0.168621000 | -0.868691000 |
| 6  | 1.147110000  | -4.912186000 | -2.344413000 |
| 1  | 2.110506000  | -5.373352000 | -2.573337000 |
| 1  | 0.454658000  | -5.164518000 | -3.150612000 |
| 1  | 0.772143000  | -5.364417000 | -1.424266000 |
| 6  | -4.015411000 | -3.307692000 | -2.277522000 |
| 1  | -4.005862000 | -3.888255000 | -1.353052000 |
| 1  | -3.614845000 | -3.937038000 | -3.075354000 |
| 1  | -5.056902000 | -3.084095000 | -2.519083000 |
| 1  | -1.047810000 | 0.255177000  | -1.476282000 |
| 1  | 0.858738000  | -0.408060000 | -1.532092000 |
| 14 | -0.811864000 | 3.594221000  | -0.885163000 |
| 6  | -2.660301000 | 3.281756000  | -0.628534000 |
| 1  | -2.939162000 | 3.358104000  | 0.424162000  |
| 1  | -3.244510000 | 4.024805000  | -1.181283000 |
| 1  | -2.956596000 | 2.292958000  | -0.981632000 |
| 6  | -0.439364000 | 5.326590000  | -0.214147000 |

---

|    |              |             |              |
|----|--------------|-------------|--------------|
| 1  | -1.038499000 | 6.078691000 | -0.737583000 |
| 1  | -0.676509000 | 5.392115000 | 0.850166000  |
| 1  | 0.611748000  | 5.593716000 | -0.333525000 |
| 6  | -0.497837000 | 3.588049000 | -2.750884000 |
| 1  | -1.179705000 | 4.283714000 | -3.250788000 |
| 1  | 0.522041000  | 3.889602000 | -2.995391000 |
| 1  | -0.662374000 | 2.593914000 | -3.170139000 |
| 14 | 2.940573000  | 2.271932000 | -0.770189000 |
| 6  | 3.313039000  | 4.130461000 | -0.804461000 |
| 1  | 2.609231000  | 4.676862000 | -1.434604000 |
| 1  | 3.274877000  | 4.568166000 | 0.195313000  |
| 1  | 4.317662000  | 4.300489000 | -1.205064000 |
| 6  | 3.013164000  | 1.626226000 | -2.545835000 |
| 1  | 2.245759000  | 2.080670000 | -3.173822000 |
| 1  | 3.990041000  | 1.847202000 | -2.988107000 |
| 1  | 2.864313000  | 0.546021000 | -2.572795000 |
| 6  | 4.355976000  | 1.452250000 | 0.186608000  |
| 1  | 5.313280000  | 1.680053000 | -0.293819000 |
| 1  | 4.407413000  | 1.811880000 | 1.216618000  |
| 1  | 4.248711000  | 0.366495000 | 0.214600000  |

### 1b

|    |              |              |              |
|----|--------------|--------------|--------------|
| 83 | -0.662870000 | -0.132254000 | -0.615296000 |
| 14 | -1.835879000 | 2.218612000  | -0.028059000 |
| 14 | -2.540410000 | -1.758527000 | 0.414778000  |
| 7  | 3.083066000  | 0.855697000  | 0.754279000  |
| 7  | 2.989220000  | -1.241553000 | 0.280171000  |
| 6  | 4.284492000  | 0.535800000  | 0.125449000  |
| 6  | 2.270684000  | -0.230825000 | 0.837542000  |
| 6  | 4.223814000  | -0.786765000 | -0.176255000 |
| 6  | 5.213364000  | -1.673454000 | -0.845661000 |
| 1  | 5.564028000  | -2.469930000 | -0.183457000 |
| 1  | 6.084127000  | -1.098067000 | -1.154478000 |
| 1  | 4.795433000  | -2.147043000 | -1.737545000 |
| 6  | -1.776243000 | -3.487479000 | 0.550758000  |
| 1  | -1.407952000 | -3.839440000 | -0.415636000 |
| 1  | -2.520641000 | -4.207238000 | 0.905810000  |
| 1  | -0.942452000 | -3.495489000 | 1.255387000  |
| 6  | -1.968882000 | 2.612826000  | 1.816723000  |
| 1  | -2.604668000 | 1.893550000  | 2.335138000  |
| 1  | -2.397660000 | 3.609808000  | 1.961266000  |
| 1  | -0.991792000 | 2.589208000  | 2.301597000  |
| 6  | 2.737786000  | 2.184800000  | 1.224478000  |
| 1  | 3.562983000  | 2.604579000  | 1.799040000  |
| 1  | 1.861634000  | 2.106719000  | 1.859137000  |
| 1  | 2.515358000  | 2.846565000  | 0.385649000  |
| 6  | 2.486298000  | -2.593437000 | 0.107144000  |
| 1  | 1.824756000  | -2.832344000 | 0.934292000  |
| 1  | 3.318051000  | -3.293924000 | 0.095046000  |
| 1  | 1.924942000  | -2.681430000 | -0.825141000 |
| 6  | 5.359438000  | 1.538455000  | -0.103952000 |
| 1  | 5.000878000  | 2.391546000  | -0.685584000 |
| 1  | 6.184612000  | 1.088192000  | -0.652523000 |
| 1  | 5.762300000  | 1.928360000  | 0.834994000  |
| 6  | -0.804414000 | 3.590574000  | -0.837473000 |
| 1  | 0.206997000  | 3.631370000  | -0.427190000 |
| 1  | -1.267424000 | 4.568783000  | -0.672887000 |
| 1  | -0.719105000 | 3.437234000  | -1.915443000 |
| 6  | -3.161714000 | -1.264615000 | 2.130858000  |
| 1  | -2.329643000 | -1.134997000 | 2.825276000  |
| 1  | -3.825469000 | -2.036302000 | 2.534148000  |
| 1  | -3.721453000 | -0.327851000 | 2.100456000  |
| 6  | -3.571925000 | 2.319209000  | -0.779657000 |
| 1  | -3.554475000 | 2.114071000  | -1.852094000 |
| 1  | -3.989284000 | 3.321113000  | -0.636467000 |
| 1  | -4.256238000 | 1.606185000  | -0.315906000 |
| 6  | -4.026610000 | -1.882859000 | -0.752534000 |
| 1  | -4.523391000 | -0.919036000 | -0.878425000 |
| 1  | -4.764517000 | -2.591074000 | -0.361976000 |
| 1  | -3.722345000 | -2.228564000 | -1.742929000 |
| 5  | 0.809468000  | -0.312187000 | 1.398733000  |
| 1  | 0.520480000  | 0.590080000  | 2.132081000  |
| 1  | 0.548312000  | -1.400157000 | 1.834526000  |

### 1c

|    |             |              |              |
|----|-------------|--------------|--------------|
| 83 | 1.030644000 | -0.303616000 | -0.638716000 |
| 14 | 3.352036000 | -1.145643000 | 0.417390000  |

|    |              |              |              |
|----|--------------|--------------|--------------|
| 14 | 1.195975000  | 2.312327000  | -0.028633000 |
| 7  | -1.821691000 | -0.850789000 | 0.915255000  |
| 7  | -5.817442000 | -0.135276000 | -0.122851000 |
| 6  | -4.523098000 | -0.371685000 | 0.220456000  |
| 5  | -0.314191000 | -1.096968000 | 1.265699000  |
| 6  | -3.807627000 | 0.477927000  | 1.093757000  |
| 1  | -4.265544000 | 1.349278000  | 1.534160000  |
| 6  | 3.289443000  | -3.037766000 | 0.409398000  |
| 1  | 3.148360000  | -3.426050000 | -0.601794000 |
| 1  | 2.467495000  | -3.406388000 | 1.026219000  |
| 1  | 4.221197000  | -3.456863000 | 0.802481000  |
| 6  | -3.804671000 | -1.485717000 | -0.270641000 |
| 1  | -4.261091000 | -2.202850000 | -0.934266000 |
| 6  | -2.499133000 | 0.207147000  | 1.406480000  |
| 1  | -1.938328000 | 0.843420000  | 2.074901000  |
| 6  | -6.511975000 | -1.039368000 | -1.025280000 |
| 1  | -6.005130000 | -1.108897000 | -1.992010000 |
| 1  | -7.516931000 | -0.665425000 | -1.199381000 |
| 1  | -6.592826000 | -2.047248000 | -0.606520000 |
| 6  | 3.683033000  | -0.581448000 | 2.193150000  |
| 1  | 2.841657000  | -0.817337000 | 2.847193000  |
| 1  | 3.858266000  | 0.494850000  | 2.248176000  |
| 1  | 4.572126000  | -1.083069000 | 2.589298000  |
| 6  | -6.519151000 | 1.018188000  | 0.416878000  |
| 1  | -6.580532000 | 0.979458000  | 1.508678000  |
| 1  | -7.531711000 | 1.033900000  | 0.023788000  |
| 1  | -6.031344000 | 1.955360000  | 0.133159000  |
| 6  | -2.495749000 | -1.679997000 | 0.089558000  |
| 1  | -1.930238000 | -2.522218000 | -0.281360000 |
| 6  | -0.337992000 | 3.155008000  | -0.765237000 |
| 1  | -1.259431000 | 2.748506000  | -0.341087000 |
| 1  | -0.385054000 | 3.014064000  | -1.847327000 |
| 1  | -0.324989000 | 4.231539000  | -0.566390000 |
| 6  | 4.811032000  | -0.603763000 | -0.660826000 |
| 1  | 5.749154000  | -1.015144000 | -0.274534000 |
| 1  | 4.909459000  | 0.483279000  | -0.688584000 |
| 1  | 4.690581000  | -0.950991000 | -1.689217000 |
| 6  | 1.222032000  | 2.712943000  | 1.822348000  |
| 1  | 2.126924000  | 2.334421000  | 2.300169000  |
| 1  | 0.372382000  | 2.266481000  | 2.342326000  |
| 1  | 1.185770000  | 3.795858000  | 1.980102000  |
| 6  | 2.718636000  | 3.117856000  | -0.816327000 |
| 1  | 2.705951000  | 4.201565000  | -0.661456000 |
| 1  | 2.756429000  | 2.932401000  | -1.891788000 |
| 1  | 3.642618000  | 2.731112000  | -0.381736000 |
| 1  | -0.107024000 | -2.279499000 | 1.295785000  |
| 1  | -0.037570000 | -0.495583000 | 2.264264000  |

### 2

|    |              |              |              |
|----|--------------|--------------|--------------|
| 83 | 2.247926000  | 0.100666000  | 0.512241000  |
| 7  | -2.482864000 | -1.178908000 | 0.485786000  |
| 7  | -2.593426000 | 0.965284000  | 0.497739000  |
| 6  | -1.804496000 | -0.066574000 | 0.094613000  |
| 6  | -2.332626000 | 2.377759000  | 0.325891000  |
| 6  | -2.071898000 | -2.554450000 | 0.307209000  |
| 6  | -3.741193000 | 0.502898000  | 1.118125000  |
| 1  | -4.491891000 | 1.170240000  | 1.499225000  |
| 6  | -3.671664000 | -0.844050000 | 1.110476000  |
| 1  | -4.348530000 | -1.589194000 | 1.485920000  |
| 6  | -1.697893000 | 3.072956000  | 1.367287000  |
| 6  | -1.399179000 | -3.192528000 | 1.361161000  |
| 6  | -2.424237000 | -3.215515000 | -0.880441000 |
| 6  | -1.086042000 | -2.501061000 | 2.681396000  |
| 1  | -1.228865000 | -1.428631000 | 2.544903000  |
| 6  | -2.788011000 | 3.008335000  | -0.842341000 |
| 6  | -1.059302000 | -4.533841000 | 1.185229000  |
| 1  | -0.534578000 | -5.057220000 | 1.973136000  |
| 6  | -1.380808000 | -5.207708000 | 0.018723000  |
| 1  | -1.103090000 | -6.247860000 | -0.097794000 |
| 6  | -2.058728000 | -4.555219000 | -0.998579000 |
| 1  | -2.307394000 | -5.096110000 | -1.901662000 |
| 6  | -3.219702000 | -2.545942000 | -1.991908000 |
| 1  | -3.183328000 | -1.468900000 | -1.828604000 |
| 6  | -1.262569000 | 2.399552000  | 2.662147000  |
| 1  | -1.242503000 | 1.322468000  | 2.491272000  |
| 6  | -1.512900000 | 4.445202000  | 1.200516000  |
| 1  | -1.021354000 | 5.014069000  | 1.977968000  |

|                                                      |              |              |              |
|------------------------------------------------------|--------------|--------------|--------------|
| 6                                                    | -3.524544000 | 2.265782000  | -1.947876000 |
| 1                                                    | -3.397372000 | 1.196561000  | -1.778192000 |
| 6                                                    | -1.944899000 | 5.093355000  | 0.054954000  |
| 1                                                    | -1.786850000 | 6.159047000  | -0.054148000 |
| 6                                                    | -2.576831000 | 4.381703000  | -0.951883000 |
| 1                                                    | -2.909952000 | 4.901408000  | -1.840317000 |
| 6                                                    | -2.058796000 | -2.963629000 | 3.780381000  |
| 1                                                    | -3.099485000 | -2.789528000 | 3.501443000  |
| 1                                                    | -1.864656000 | -2.426881000 | 4.711491000  |
| 1                                                    | -1.943379000 | -4.031529000 | 3.978308000  |
| 6                                                    | 0.366835000  | -2.701479000 | 3.130609000  |
| 1                                                    | 0.581570000  | -3.746711000 | 3.360837000  |
| 1                                                    | 0.559158000  | -2.120951000 | 4.035053000  |
| 1                                                    | 1.068234000  | -2.368852000 | 2.366394000  |
| 6                                                    | 0.149703000  | 2.805629000  | 3.101757000  |
| 1                                                    | 0.878278000  | 2.626642000  | 2.311949000  |
| 1                                                    | 0.449558000  | 2.219265000  | 3.972288000  |
| 1                                                    | 0.201622000  | 3.858769000  | 3.384651000  |
| 6                                                    | -2.274917000 | 2.674926000  | 3.788046000  |
| 1                                                    | -2.328638000 | 3.743098000  | 4.009600000  |
| 1                                                    | -1.977233000 | 2.156872000  | 4.702277000  |
| 1                                                    | -3.279302000 | 2.340020000  | 3.523737000  |
| 6                                                    | -2.954931000 | 2.564179000  | -3.341499000 |
| 1                                                    | -3.117237000 | 3.603790000  | -3.632894000 |
| 1                                                    | -3.449760000 | 1.937039000  | -4.086170000 |
| 1                                                    | -1.885600000 | 2.357948000  | -3.377271000 |
| 6                                                    | -2.630629000 | -2.802676000 | -3.385370000 |
| 1                                                    | -1.583531000 | -2.504221000 | -3.426020000 |
| 1                                                    | -3.179830000 | -2.224272000 | -4.131276000 |
| 1                                                    | -2.704064000 | -3.853614000 | -3.671897000 |
| 31                                                   | -0.034602000 | 0.032382000  | -1.081419000 |
| 6                                                    | -4.696097000 | -2.975778000 | -1.936960000 |
| 1                                                    | -4.796509000 | -4.050118000 | -2.106742000 |
| 1                                                    | -5.271958000 | -2.459128000 | -2.707950000 |
| 1                                                    | -5.148420000 | -2.748762000 | -0.969743000 |
| 6                                                    | -5.032560000 | 2.566334000  | -1.897604000 |
| 1                                                    | -5.464859000 | 2.304903000  | -0.929861000 |
| 1                                                    | -5.559777000 | 1.997740000  | -2.666813000 |
| 1                                                    | -5.226819000 | 3.626742000  | -2.072583000 |
| 1                                                    | -0.242456000 | 1.392522000  | -1.872428000 |
| 1                                                    | -0.140280000 | -1.299816000 | -1.935273000 |
| 14                                                   | 3.369809000  | 2.153857000  | -0.825960000 |
| 6                                                    | 2.448221000  | 3.734882000  | -0.342936000 |
| 1                                                    | 2.507028000  | 3.916104000  | 0.732488000  |
| 1                                                    | 2.891412000  | 4.598158000  | -0.850071000 |
| 1                                                    | 1.393935000  | 3.687937000  | -0.620687000 |
| 6                                                    | 5.169915000  | 2.364314000  | -0.273943000 |
| 1                                                    | 5.612881000  | 3.241456000  | -0.756823000 |
| 1                                                    | 5.238069000  | 2.507179000  | 0.806684000  |
| 1                                                    | 5.781287000  | 1.497730000  | -0.531551000 |
| 6                                                    | 3.341249000  | 2.022453000  | -2.711149000 |
| 1                                                    | 3.748668000  | 2.937024000  | -3.154638000 |
| 1                                                    | 3.941556000  | 1.184377000  | -3.068937000 |
| 1                                                    | 2.323441000  | 1.891579000  | -3.082095000 |
| 14                                                   | 3.517351000  | -1.904117000 | -0.770471000 |
| 6                                                    | 5.383549000  | -1.761237000 | -0.479786000 |
| 1                                                    | 5.801249000  | -0.879089000 | -0.968715000 |
| 1                                                    | 5.618407000  | -1.693223000 | 0.584417000  |
| 1                                                    | 5.898144000  | -2.639494000 | -0.882876000 |
| 6                                                    | 3.224001000  | -2.028533000 | -2.632745000 |
| 1                                                    | 3.574845000  | -1.140235000 | -3.159648000 |
| 1                                                    | 3.763283000  | -2.892299000 | -3.035766000 |
| 1                                                    | 2.164395000  | -2.154269000 | -2.859985000 |
| 6                                                    | 2.944796000  | -3.532737000 | 0.007668000  |
| 1                                                    | 3.459649000  | -4.376122000 | -0.463851000 |
| 1                                                    | 3.163198000  | -3.564813000 | 1.077271000  |
| 1                                                    | 1.871324000  | -3.682784000 | -0.121749000 |
| <hr/>                                                |              |              |              |
| <b>H<sub>2</sub></b>                                 |              |              |              |
| 1                                                    | 0.000000000  | 0.000000000  | 0.380000000  |
| 1                                                    | 0.000000000  | 0.000000000  | -0.380000000 |
| <hr/>                                                |              |              |              |
| <b>HSi(CH<sub>3</sub>)<sub>3</sub></b>               |              |              |              |
| 6                                                    | 1.545938000  | -0.892548000 | -0.221316000 |
| 14                                                   | 0.000000000  | 0.000000000  | 0.374025000  |
| 6                                                    | 0.000000000  | 1.785095000  | -0.221316000 |
| 1                                                    | 0.000000000  | 0.000000000  | 1.863245000  |
| <hr/>                                                |              |              |              |
| 6                                                    | -1.545938000 | -0.892548000 | -0.221316000 |
| 1                                                    | 0.000000000  | 1.838333000  | -1.313166000 |
| 1                                                    | 0.881763000  | 2.321263000  | 0.137266000  |
| 1                                                    | -0.881763000 | 2.321263000  | 0.137266000  |
| 1                                                    | -1.592043000 | -0.919166000 | -1.313166000 |
| 1                                                    | -2.451155000 | -0.397002000 | 0.137266000  |
| 1                                                    | -1.569391000 | -1.924261000 | 0.137266000  |
| 1                                                    | 2.451155000  | -0.397002000 | 0.137266000  |
| 1                                                    | 1.592043000  | -0.919166000 | -1.313166000 |
| 1                                                    | 1.569391000  | -1.924261000 | 0.137266000  |
| <hr/>                                                |              |              |              |
| <b>CH<sub>3</sub>OH</b>                              |              |              |              |
| 8                                                    | -0.046596000 | -0.756501000 | 0.000000000  |
| 6                                                    | -0.046596000 | 0.663615000  | 0.000000000  |
| 1                                                    | 0.438484000  | 1.078506000  | 0.890984000  |
| 1                                                    | 0.438484000  | 1.078506000  | -0.890984000 |
| 1                                                    | -1.089053000 | 0.979408000  | 0.000000000  |
| 1                                                    | 0.864424000  | -1.066100000 | 0.000000000  |
| <hr/>                                                |              |              |              |
| <b>CH<sub>3</sub>OSi(CH<sub>3</sub>)<sub>3</sub></b> |              |              |              |
| 6                                                    | -0.522153000 | -1.535462000 | 1.078412000  |
| 14                                                   | -0.377723000 | 0.000016000  | 0.004045000  |
| 6                                                    | -1.680089000 | 0.003234000  | -1.337530000 |
| 6                                                    | -0.520612000 | 1.531445000  | 1.084431000  |
| 1                                                    | -2.687101000 | 0.002876000  | -0.912943000 |
| 1                                                    | -1.584433000 | -0.877842000 | -1.975698000 |
| 1                                                    | -1.583569000 | 0.886740000  | -1.972211000 |
| 1                                                    | -1.491588000 | 1.563635000  | 1.585876000  |
| 1                                                    | -0.422622000 | 2.444218000  | 0.492065000  |
| 1                                                    | 0.246563000  | 1.554117000  | 1.862466000  |
| 1                                                    | -0.427691000 | -2.445955000 | 0.481953000  |
| 1                                                    | -1.492133000 | -1.567424000 | 1.581804000  |
| 1                                                    | 0.246622000  | -1.563419000 | 1.854688000  |
| 8                                                    | 1.069807000  | 0.000839000  | -0.807514000 |
| 6                                                    | 2.354798000  | 0.000152000  | -0.220531000 |
| 1                                                    | 3.096790000  | 0.000393000  | -1.020411000 |
| 1                                                    | 2.518811000  | 0.888706000  | 0.399095000  |
| 1                                                    | 2.518353000  | -0.889188000 | 0.398103000  |
| <hr/>                                                |              |              |              |
| <b>DMAP·BH<sub>2</sub>BiH<sub>2</sub></b>            |              |              |              |
| 5                                                    | -0.833281000 | 0.302899000  | 1.625804000  |
| 1                                                    | -1.027624000 | -0.578699000 | 2.411963000  |
| 1                                                    | -1.036667000 | 1.417374000  | 2.024942000  |
| 83                                                   | -2.333790000 | -0.020341000 | -0.281074000 |
| 7                                                    | 0.637553000  | 0.208497000  | 1.093192000  |
| 6                                                    | 3.279437000  | 0.014750000  | 0.096905000  |
| 6                                                    | 1.323987000  | 1.300574000  | 0.697880000  |
| 6                                                    | 1.271102000  | -0.980676000 | 1.000577000  |
| 6                                                    | 2.549510000  | -1.118205000 | 0.525134000  |
| 6                                                    | 2.605047000  | 1.250965000  | 0.206446000  |
| 1                                                    | 0.796293000  | 2.238040000  | 0.796004000  |
| 1                                                    | 0.695611000  | -1.835260000 | 1.324772000  |
| 1                                                    | 2.974082000  | -2.108958000 | 0.489293000  |
| 1                                                    | 3.074308000  | 2.177523000  | -0.084215000 |
| 7                                                    | 4.547591000  | -0.080506000 | -0.384959000 |
| 6                                                    | 5.261558000  | 1.113738000  | -0.805987000 |
| 6                                                    | 5.200525000  | -1.376418000 | -0.476553000 |
| 1                                                    | 6.250330000  | 0.831981000  | -1.156800000 |
| 1                                                    | 5.384122000  | 1.822203000  | 0.018795000  |
| 1                                                    | 4.744906000  | 1.624846000  | -1.623880000 |
| 1                                                    | 5.302267000  | -1.847964000 | 0.505530000  |
| 1                                                    | 6.196078000  | -1.244317000 | -0.890782000 |
| 1                                                    | 4.649738000  | -2.059237000 | -1.130066000 |
| 1                                                    | -1.716330000 | -1.686417000 | -0.637186000 |
| 1                                                    | -3.659149000 | -0.701582000 | 0.727722000  |
| <hr/>                                                |              |              |              |
| <b>DMAP·BH<sub>2</sub>Bi(OMe)<sub>2</sub></b>        |              |              |              |
| 5                                                    | 0.536924000  | -0.000206000 | 2.031996000  |
| 1                                                    | 0.737618000  | 1.014161000  | 2.643269000  |
| 1                                                    | 0.737668000  | -1.014755000 | 2.642959000  |
| 83                                                   | 2.066302000  | -0.000206000 | 0.188652000  |
| 7                                                    | -0.888752000 | -0.000155000 | 1.412075000  |
| 6                                                    | -3.447191000 | -0.000017000 | 0.218352000  |
| 6                                                    | -1.518852000 | -1.153723000 | 1.102154000  |
| 6                                                    | -1.518752000 | 1.153518000  | 1.102180000  |
| 6                                                    | -2.762762000 | 1.195812000  | 0.527201000  |
| 6                                                    | -2.762879000 | -1.195903000 | 0.527144000  |
| 1                                                    | -0.973335000 | -2.056174000 | 1.329077000  |

|   |              |              |              |
|---|--------------|--------------|--------------|
| 1 | -0.973099000 | 2.055888000  | 1.329081000  |
| 1 | -3.190084000 | 2.162687000  | 0.314352000  |
| 1 | -3.190280000 | -2.162748000 | 0.314320000  |
| 7 | -4.686906000 | 0.000070000  | -0.343978000 |
| 6 | -5.345175000 | -1.255485000 | -0.663734000 |
| 6 | -5.345221000 | 1.255698000  | -0.663336000 |
| 1 | -6.322930000 | -1.046202000 | -1.088643000 |
| 1 | -5.489386000 | -1.871932000 | 0.228450000  |
| 1 | -4.775439000 | -1.838149000 | -1.394224000 |
| 1 | -5.488858000 | 1.872112000  | 0.228956000  |
| 1 | -6.323252000 | 1.046524000  | -1.087664000 |
| 1 | -4.775863000 | 1.838350000  | -1.394138000 |
| 8 | 1.012355000  | 1.600883000  | -0.729081000 |
| 6 | 1.353242000  | 2.039042000  | -2.021971000 |
| 1 | 2.438824000  | 2.082988000  | -2.190082000 |
| 1 | 0.923316000  | 1.397127000  | -2.803337000 |
| 1 | 0.958124000  | 3.051454000  | -2.169414000 |
| 8 | 1.012257000  | -1.600687000 | -0.729375000 |
| 6 | 1.353015000  | -2.038716000 | -2.022336000 |
| 1 | 0.922937000  | -1.396783000 | -2.803606000 |
| 1 | 2.438580000  | -2.082551000 | -2.190585000 |
| 1 | 0.957968000  | -3.051153000 | -2.169802000 |

### IDipp·BH<sub>2</sub>BiH<sub>2</sub>

|    |              |              |              |
|----|--------------|--------------|--------------|
| 83 | 0.055659000  | -2.315795000 | -1.455897000 |
| 7  | 1.066288000  | 0.997391000  | 0.945083000  |
| 7  | -1.097203000 | 0.990058000  | 0.933110000  |
| 6  | 2.572225000  | -1.316990000 | 1.905430000  |
| 1  | 1.488348000  | -1.255132000 | 1.796762000  |
| 6  | 2.278515000  | 3.147025000  | -0.622724000 |
| 1  | 1.220193000  | 2.972948000  | -0.433218000 |
| 6  | -4.441879000 | 1.716391000  | -0.505127000 |
| 1  | -4.933937000 | 2.470482000  | -1.105000000 |
| 6  | -4.558671000 | -0.336534000 | 0.733099000  |
| 1  | -5.140686000 | -1.175792000 | 1.088834000  |
| 6  | -2.332685000 | 3.083320000  | -0.694456000 |
| 1  | -1.270558000 | 2.917400000  | -0.520130000 |
| 6  | 4.406921000  | 1.808342000  | -0.454724000 |
| 1  | 4.890551000  | 2.585790000  | -1.031285000 |
| 6  | 3.190477000  | -0.222867000 | 1.045197000  |
| 6  | 2.990931000  | -2.728569000 | 1.472707000  |
| 1  | 2.787433000  | -2.902341000 | 0.416333000  |
| 1  | 2.434209000  | -3.472201000 | 2.046198000  |
| 1  | 4.052441000  | -2.909572000 | 1.651974000  |
| 6  | -3.086132000 | 1.852981000  | -0.211194000 |
| 6  | -0.697116000 | 1.538441000  | 2.140969000  |
| 1  | -1.406389000 | 1.878350000  | 2.872205000  |
| 6  | 0.649872000  | 1.542624000  | 2.149105000  |
| 1  | 1.348856000  | 1.887361000  | 2.888066000  |
| 6  | -2.913076000 | -1.063799000 | 3.427690000  |
| 1  | -2.585838000 | -0.078042000 | 3.760656000  |
| 1  | -2.429661000 | -1.810044000 | 4.062082000  |
| 1  | -3.990707000 | -1.129243000 | 3.593397000  |
| 6  | -5.171901000 | 0.634523000  | -0.041285000 |
| 1  | -6.223629000 | 0.547519000  | -0.284249000 |
| 6  | -2.745653000 | 4.327136000  | 0.110791000  |
| 1  | -3.803366000 | 4.557066000  | -0.034952000 |
| 1  | -2.166947000 | 5.196994000  | -0.207947000 |
| 1  | -2.581096000 | 4.185569000  | 1.180741000  |
| 6  | -0.010342000 | 0.659407000  | 0.169450000  |
| 6  | -2.502055000 | 3.322849000  | -2.200924000 |
| 1  | -2.202834000 | 2.444251000  | -2.772010000 |
| 1  | -1.878925000 | 4.162294000  | -2.516856000 |
| 1  | -3.534090000 | 3.567764000  | -2.459954000 |
| 6  | 3.048181000  | 1.917629000  | -0.163004000 |
| 6  | 2.693855000  | 4.387309000  | 0.186426000  |
| 1  | 2.548098000  | 4.234730000  | 1.257573000  |
| 1  | 2.101704000  | 5.254146000  | -0.115099000 |
| 1  | 3.746658000  | 4.629197000  | 0.025459000  |
| 6  | 2.459488000  | 0.884745000  | 0.584057000  |
| 6  | 4.547027000  | -0.277077000 | 0.725220000  |
| 1  | 5.139802000  | -1.116859000 | 1.061505000  |
| 6  | 5.150152000  | 0.723844000  | -0.018743000 |
| 1  | 6.204132000  | 0.658516000  | -0.258738000 |
| 6  | -2.574903000 | -1.317432000 | 1.947389000  |
| 1  | -1.491415000 | -1.245705000 | 1.838360000  |
| 6  | -3.204439000 | -0.255070000 | 1.055848000  |

|   |              |              |              |
|---|--------------|--------------|--------------|
| 6 | 2.905166000  | -1.099232000 | 3.392482000  |
| 1 | 3.983079000  | -1.155694000 | 3.559765000  |
| 1 | 2.428970000  | -1.867342000 | 4.005788000  |
| 1 | 2.564555000  | -0.126270000 | 3.749147000  |
| 6 | -2.976925000 | -2.745776000 | 1.554503000  |
| 1 | -2.402598000 | -3.466197000 | 2.140545000  |
| 1 | -2.787915000 | -2.937586000 | 0.498879000  |
| 1 | -4.033085000 | -2.937565000 | 1.753334000  |
| 5 | 0.005663000  | 0.128609000  | -1.301052000 |
| 6 | 2.423787000  | 3.398832000  | -2.129983000 |
| 1 | 3.451624000  | 3.646684000  | -2.402711000 |
| 1 | 1.794861000  | 4.239879000  | -2.429702000 |
| 1 | 2.116748000  | 2.524328000  | -2.703223000 |
| 6 | -2.486923000 | 0.849325000  | 0.566419000  |
| 1 | 1.039891000  | 0.399181000  | -1.846337000 |
| 1 | -0.984856000 | 0.437121000  | -1.896518000 |
| 1 | -1.733342000 | -2.546452000 | -1.531113000 |
| 1 | 0.124711000  | -2.198061000 | -3.248954000 |

### IDipp·BH<sub>2</sub>Bi(OMe)<sub>2</sub>

|    |              |              |              |
|----|--------------|--------------|--------------|
| 83 | -0.445418000 | -2.277011000 | -0.631940000 |
| 7  | 1.136728000  | 1.557046000  | 0.829378000  |
| 7  | -1.027501000 | 1.553283000  | 0.866092000  |
| 6  | 2.674048000  | -0.311826000 | 2.465480000  |
| 1  | 1.587457000  | -0.243756000 | 2.391053000  |
| 6  | 2.301707000  | 3.061958000  | -1.393432000 |
| 1  | 1.246967000  | 2.946968000  | -1.146826000 |
| 6  | -4.405477000 | 1.737601000  | -0.663478000 |
| 1  | -4.921855000 | 2.259473000  | -1.458143000 |
| 6  | -4.458294000 | 0.161787000  | 1.146631000  |
| 1  | -5.016378000 | -0.537660000 | 1.754098000  |
| 6  | -2.335949000 | 3.035370000  | -1.289093000 |
| 1  | -1.267028000 | 2.942245000  | -1.102485000 |
| 6  | 4.447876000  | 1.872423000  | -0.818337000 |
| 1  | 4.916288000  | 2.416388000  | -1.628011000 |
| 6  | 3.270669000  | 0.446558000  | 1.288026000  |
| 6  | 3.032731000  | -1.804001000 | 2.448064000  |
| 1  | 2.750126000  | -2.261591000 | 1.499655000  |
| 1  | 2.503297000  | -2.319523000 | 3.253142000  |
| 1  | 4.100551000  | -1.962830000 | 2.612725000  |
| 6  | -3.052111000 | 1.991310000  | -0.445375000 |
| 6  | -0.604370000 | 2.448303000  | 1.835807000  |
| 1  | -1.298705000 | 2.999377000  | 2.442072000  |
| 6  | 0.742394000  | 2.449096000  | 1.813335000  |
| 1  | 1.455976000  | 3.001115000  | 2.396158000  |
| 6  | -2.798297000 | 0.389309000  | 3.914814000  |
| 1  | -2.504245000 | 1.439247000  | 3.901006000  |
| 1  | -2.290867000 | -0.091048000 | 4.754120000  |
| 1  | -3.873335000 | 0.348144000  | 4.102883000  |
| 6  | -5.101806000 | 0.830120000  | 0.117783000  |
| 1  | -6.151464000 | 0.645115000  | -0.073361000 |
| 6  | -2.758885000 | 4.454122000  | -0.870760000 |
| 1  | -3.825038000 | 4.614234000  | -1.045922000 |
| 1  | -2.208651000 | 5.200636000  | -1.447610000 |
| 1  | -2.564913000 | 4.635839000  | 0.188062000  |
| 6  | 0.046601000  | 0.998704000  | 0.219965000  |
| 6  | -2.544683000 | 2.824444000  | -2.794756000 |
| 1  | -2.248683000 | 1.819841000  | -3.095782000 |
| 1  | -1.939858000 | 3.538856000  | -3.357017000 |
| 1  | -3.585377000 | 2.978462000  | -3.087304000 |
| 6  | 3.091836000  | 2.063894000  | -0.560058000 |
| 6  | 2.702624000  | 4.506054000  | -1.047714000 |
| 1  | 2.556645000  | 4.720245000  | 0.012860000  |
| 1  | 2.102653000  | 5.215964000  | -1.621568000 |
| 1  | 3.753361000  | 4.689881000  | -1.281863000 |
| 6  | 2.525150000  | 1.334971000  | 0.497619000  |
| 6  | 4.623530000  | 0.296957000  | 0.984270000  |
| 1  | 5.226724000  | -0.384241000 | 1.569071000  |
| 6  | 5.207310000  | 0.998510000  | -0.057171000 |
| 1  | 6.258706000  | 0.862583000  | -0.278171000 |
| 6  | -2.448741000 | -0.324471000 | 2.596201000  |
| 1  | -1.366780000 | -0.261189000 | 2.466487000  |
| 6  | -3.105954000 | 0.375831000  | 1.412751000  |
| 6  | 3.087605000  | 0.332001000  | 3.800379000  |
| 1  | 4.170474000  | 0.285147000  | 3.935289000  |
| 1  | 2.623339000  | -0.195332000 | 4.636757000  |
| 1  | 2.792466000  | 1.381273000  | 3.858037000  |

|                                                          |              |              |              |                             |              |              |              |
|----------------------------------------------------------|--------------|--------------|--------------|-----------------------------|--------------|--------------|--------------|
| 6                                                        | -2.809640000 | -1.813138000 | 2.698177000  | 83                          | -1.685931000 | 0.000423000  | 0.336615000  |
| 1                                                        | -2.222678000 | -2.282559000 | 3.490050000  | 8                           | -0.923960000 | 1.604164000  | -0.841355000 |
| 1                                                        | -2.607890000 | -2.347782000 | 1.769417000  | 6                           | -1.621805000 | 2.032295000  | -1.987639000 |
| 1                                                        | -3.862263000 | -1.959100000 | 2.947346000  | 1                           | -1.381731000 | 1.420305000  | -2.867635000 |
| 5                                                        | 0.031928000  | 0.056369000  | -1.024171000 | 1                           | -2.713547000 | 2.015349000  | -1.858965000 |
| 6                                                        | 2.436180000  | 2.800249000  | -2.900079000 | 1                           | -1.336140000 | 3.066456000  | -2.214211000 |
| 1                                                        | 3.458083000  | 2.962185000  | -3.248850000 | 8                           | -0.925806000 | -1.604803000 | -0.840484000 |
| 1                                                        | 1.789132000  | 3.481560000  | -3.456846000 | 6                           | -1.624438000 | -2.033361000 | -1.986126000 |
| 1                                                        | 2.146971000  | 1.778928000  | -3.146553000 | 1                           | -2.716156000 | -2.014014000 | -1.857583000 |
| 6                                                        | -2.419152000 | 1.288688000  | 0.593119000  | 1                           | -1.383066000 | -1.423190000 | -2.867028000 |
| 1                                                        | 1.083071000  | 0.035285000  | -1.593825000 | 1                           | -1.340850000 | -3.068449000 | -2.211073000 |
| 1                                                        | -0.923104000 | 0.282241000  | -1.721998000 | <b>DMAP·BH<sub>3</sub></b>  |              |              |              |
| 8                                                        | 1.577629000  | -2.892427000 | -0.446277000 | 7                           | -2.169417000 | -0.000014000 | -0.019902000 |
| 6                                                        | 1.864897000  | -4.263506000 | -0.611803000 | 7                           | 2.014287000  | 0.000006000  | 0.012820000  |
| 1                                                        | 1.308671000  | -4.906300000 | 0.086859000  | 6                           | 0.653412000  | 0.000006000  | 0.001103000  |
| 1                                                        | 1.648062000  | -4.612994000 | -1.628617000 | 5                           | -3.782020000 | 0.000010000  | 0.034661000  |
| 1                                                        | 2.933350000  | -4.419112000 | -0.424470000 | 6                           | -0.097883000 | 1.195933000  | -0.007748000 |
| 8                                                        | -0.648300000 | -2.804142000 | -2.656356000 | 1                           | 0.379730000  | 2.162897000  | -0.010841000 |
| 6                                                        | 0.110900000  | -2.193761000 | -3.676872000 | 6                           | -0.097864000 | -1.195930000 | -0.007775000 |
| 1                                                        | -0.130913000 | -1.131185000 | -3.798446000 | 1                           | 0.379769000  | -2.162884000 | -0.010895000 |
| 1                                                        | 1.190480000  | -2.275212000 | -3.501078000 | 6                           | -1.471837000 | 1.146592000  | -0.018489000 |
| 1                                                        | -0.118178000 | -2.704828000 | -4.618736000 | 1                           | -2.067533000 | 2.048204000  | -0.028727000 |
| <b>IME<sub>4</sub>·BH<sub>2</sub>BiH<sub>2</sub></b>     |              |              |              | 6                           | 2.746236000  | -1.255778000 | 0.006196000  |
| 5                                                        | -0.267447000 | 0.000060000  | 1.566794000  | 1                           | 2.502836000  | -1.868198000 | 0.879344000  |
| 6                                                        | 1.132136000  | 0.000025000  | 0.871093000  | 1                           | 3.811996000  | -1.046219000 | 0.030180000  |
| 1                                                        | -0.507731000 | -1.007863000 | 2.175224000  | 1                           | 2.536434000  | -1.842649000 | -0.893412000 |
| 1                                                        | -0.507717000 | 1.008034000  | 2.175144000  | 6                           | 2.746230000  | 1.255781000  | 0.006152000  |
| 7                                                        | 1.861052000  | 1.077238000  | 0.477567000  | 1                           | 2.536359000  | 1.842676000  | -0.893418000 |
| 6                                                        | 3.011883000  | 0.679147000  | -0.198479000 | 1                           | 3.812012000  | 1.046204000  | 0.030004000  |
| 6                                                        | 3.011845000  | -0.679187000 | -0.198487000 | 1                           | 2.502965000  | 1.868185000  | 0.879344000  |
| 7                                                        | 1.861022000  | -1.077223000 | 0.477605000  | 6                           | -1.471821000 | -1.146611000 | -0.018512000 |
| 6                                                        | 1.427481000  | 2.453277000  | 0.641654000  | 1                           | -2.067508000 | -2.048227000 | -0.028769000 |
| 6                                                        | 3.993581000  | 1.647263000  | -0.758061000 | 1                           | -4.143517000 | -1.010098000 | -0.525992000 |
| 6                                                        | 3.993487000  | -1.647351000 | -0.758083000 | 1                           | -4.143516000 | 1.009642000  | -0.526855000 |
| 6                                                        | 1.427412000  | -2.453244000 | 0.641735000  | 1                           | -4.083011000 | 0.000520000  | 1.210741000  |
| 1                                                        | 2.294984000  | 3.108117000  | 0.677046000  | <b>IDipp·BH<sub>3</sub></b> |              |              |              |
| 1                                                        | 0.870978000  | 2.540872000  | 1.570104000  | 5                           | 0.000000000  | -0.072951000 | -1.921517000 |
| 1                                                        | 0.777697000  | 2.752198000  | -0.183526000 | 1                           | 1.008018000  | 0.449696000  | -2.341361000 |
| 1                                                        | 2.294895000  | -3.108109000 | 0.677145000  | 1                           | -1.008021000 | 0.449690000  | -2.341361000 |
| 1                                                        | 0.777620000  | -2.752168000 | -0.183438000 | 7                           | -1.075771000 | 0.004809000  | 0.501640000  |
| 1                                                        | 0.870906000  | -2.540797000 | 1.570186000  | 7                           | 1.075770000  | 0.004810000  | 0.501639000  |
| 1                                                        | 3.528340000  | -2.328648000 | -1.474835000 | 6                           | 0.000000000  | -0.007258000 | -0.329580000 |
| 1                                                        | 4.458356000  | -2.256630000 | 0.022188000  | 6                           | -0.674309000 | 0.019790000  | 1.828965000  |
| 1                                                        | 4.790077000  | -1.116868000 | -1.276380000 | 1                           | -1.381367000 | 0.031222000  | 2.638122000  |
| 1                                                        | 4.790132000  | 1.116743000  | -1.276380000 | 6                           | 0.674309000  | 0.019791000  | 1.828964000  |
| 1                                                        | 4.458497000  | 2.256499000  | 0.022218000  | 1                           | 1.381367000  | 0.031224000  | 2.638122000  |
| 1                                                        | 3.528466000  | 2.328602000  | -1.474793000 | 6                           | -2.461291000 | 0.002435000  | 0.097868000  |
| 83                                                       | -1.961076000 | 0.000002000  | -0.199406000 | 6                           | -3.114874000 | 1.232378000  | -0.070557000 |
| 1                                                        | -1.180222000 | -1.280894000 | -1.218762000 | 6                           | -4.466070000 | 1.202037000  | -0.411664000 |
| 1                                                        | -1.180195000 | 1.280792000  | -1.218874000 | 1                           | -4.999139000 | 2.133294000  | -0.553155000 |
| <b>IME<sub>4</sub>·BH<sub>2</sub>Bi(OMe)<sub>2</sub></b> |              |              |              | 6                           | -5.136402000 | 0.001164000  | -0.581757000 |
| 5                                                        | 0.153965000  | 0.000106000  | 1.868816000  | 1                           | -6.185585000 | 0.000569000  | -0.850151000 |
| 6                                                        | 1.472965000  | -0.000074000 | 1.024796000  | 6                           | -4.463688000 | -1.198573000 | -0.416165000 |
| 1                                                        | -0.025244000 | -1.008299000 | 2.500962000  | 1                           | -4.995224000 | -2.130387000 | -0.559461000 |
| 1                                                        | -0.025137000 | 1.008721000  | 2.500684000  | 6                           | -3.111951000 | -1.227863000 | -0.074700000 |
| 7                                                        | 2.149301000  | 1.077120000  | 0.559437000  | 6                           | -2.409230000 | 2.570081000  | 0.090350000  |
| 6                                                        | 3.228751000  | 0.679890000  | -0.221654000 | 1                           | -1.362947000 | 2.373518000  | 0.322965000  |
| 6                                                        | 3.228517000  | -0.680730000 | -0.221607000 | 6                           | -2.991932000 | 3.381738000  | 1.257845000  |
| 7                                                        | 2.148919000  | -1.077538000 | 0.559483000  | 1                           | -2.439312000 | 4.315360000  | 1.383734000  |
| 6                                                        | 1.735205000  | 2.454101000  | 0.796829000  | 1                           | -4.039072000 | 3.637152000  | 1.082447000  |
| 6                                                        | 4.144259000  | 1.642780000  | -0.892057000 | 1                           | -2.938307000 | 2.827782000  | 2.197207000  |
| 6                                                        | 4.143783000  | -1.643922000 | -0.891910000 | 6                           | -2.431792000 | 3.379974000  | -1.215211000 |
| 6                                                        | 1.734232000  | -2.454334000 | 0.796934000  | 1                           | -1.860882000 | 4.303730000  | -1.094379000 |
| 1                                                        | 2.532069000  | 3.124396000  | 0.486564000  | 1                           | -1.992784000 | 2.809932000  | -2.033932000 |
| 1                                                        | 1.542009000  | 2.596016000  | 1.858229000  | 1                           | -3.450319000 | 3.655737000  | -1.497053000 |
| 1                                                        | 0.826401000  | 2.663923000  | 0.232599000  | 6                           | -2.407372000 | -2.565243000 | 0.093918000  |
| 1                                                        | 2.530040000  | -3.125038000 | 0.484857000  | 1                           | -1.355511000 | -2.369269000 | 0.299806000  |
| 1                                                        | 0.824335000  | -2.663221000 | 0.234122000  | 6                           | -2.969951000 | -3.350722000 | 1.289250000  |
| 1                                                        | 1.542835000  | -2.596743000 | 1.858806000  | 1                           | -2.419401000 | -4.284523000 | 1.422739000  |
| 1                                                        | 3.606724000  | -2.299769000 | -1.581771000 | 1                           | -2.894437000 | -2.778434000 | 2.216063000  |
| 1                                                        | 4.671007000  | -2.278304000 | -0.174200000 | 1                           | -4.021824000 | -3.603561000 | 1.140013000  |
| 1                                                        | 4.895694000  | -1.106666000 | -1.466954000 | 6                           | -2.460062000 | -3.400543000 | -1.194138000 |
| 1                                                        | 4.895701000  | 1.105303000  | -1.467508000 | 1                           | -1.893660000 | -4.325471000 | -1.064107000 |
| 1                                                        | 4.672051000  | 2.276756000  | -0.174401000 | 1                           | -3.484982000 | -3.674822000 | -1.453204000 |
| 1                                                        | 3.607248000  | 2.299031000  | -1.581567000 | 1                           | -2.028110000 | -2.851447000 | -2.030605000 |

|   |             |              |              |
|---|-------------|--------------|--------------|
| 6 | 2.461291000 | 0.002436000  | 0.097868000  |
| 6 | 3.114872000 | 1.232381000  | -0.070560000 |
| 6 | 4.466068000 | 1.202040000  | -0.411667000 |
| 1 | 4.999135000 | 2.133298000  | -0.553160000 |
| 6 | 5.136402000 | 0.001168000  | -0.581757000 |
| 1 | 6.185584000 | 0.000575000  | -0.850152000 |
| 6 | 4.463689000 | -1.198569000 | -0.416164000 |
| 1 | 4.995227000 | -2.130383000 | -0.559458000 |
| 6 | 3.111952000 | -1.227860000 | -0.074698000 |
| 6 | 2.409226000 | 2.570083000  | 0.090345000  |
| 1 | 1.362943000 | 2.373518000  | 0.322957000  |
| 6 | 2.991925000 | 3.381741000  | 1.257842000  |
| 1 | 2.938297000 | 2.827784000  | 2.197203000  |
| 1 | 4.039064000 | 3.637155000  | 1.082446000  |
| 1 | 2.439303000 | 4.315362000  | 1.383729000  |
| 6 | 2.431790000 | 3.379976000  | -1.215217000 |
| 1 | 1.860879000 | 4.303444000  | -1.094385000 |
| 1 | 3.450318000 | 3.655741000  | -1.497056000 |
| 1 | 1.992785000 | 2.809933000  | -2.033939000 |
| 6 | 2.407376000 | -2.565241000 | 0.093924000  |
| 1 | 1.355514000 | -2.369268000 | 0.299810000  |
| 6 | 2.969955000 | -3.350715000 | 1.289258000  |
| 1 | 2.419406000 | -4.284517000 | 1.422750000  |
| 1 | 4.021828000 | -3.603552000 | 1.140024000  |
| 1 | 2.894438000 | -2.778424000 | 2.216070000  |
| 6 | 2.460069000 | -3.400546000 | -1.194129000 |
| 1 | 1.893668000 | -4.325474000 | -1.064096000 |
| 1 | 2.028117000 | -2.851453000 | -2.030599000 |
| 1 | 3.484990000 | -3.674824000 | -1.453193000 |

1 0.000003000 -1.258676000 -2.217371000

---

**IMe<sub>4</sub>·BH<sub>3</sub>**

|   |              |              |              |
|---|--------------|--------------|--------------|
| 7 | -0.858916000 | 0.750008000  | -0.006097000 |
| 7 | 1.122481000  | -0.067284000 | -0.015043000 |
| 6 | -1.003430000 | -0.638215000 | 0.001148000  |
| 6 | 0.447016000  | 1.105663000  | -0.012688000 |
| 6 | 0.252366000  | -1.154236000 | -0.002608000 |
| 6 | 0.729297000  | -2.563581000 | -0.000406000 |
| 1 | 1.294041000  | -2.804198000 | -0.905246000 |
| 1 | -0.114851000 | -3.248819000 | 0.052499000  |
| 1 | 1.378443000  | -2.770363000 | 0.854402000  |
| 6 | -1.974853000 | 1.681433000  | 0.001832000  |
| 1 | -2.610956000 | 1.519265000  | -0.869266000 |
| 1 | -1.570593000 | 2.687607000  | -0.025835000 |
| 1 | -2.571047000 | 1.553355000  | 0.906416000  |
| 6 | 2.572041000  | -0.162375000 | 0.008684000  |
| 1 | 2.977576000  | 0.820785000  | -0.207142000 |
| 1 | 2.913971000  | -0.871863000 | -0.744681000 |
| 1 | 2.921433000  | -0.486529000 | 0.990659000  |
| 6 | -2.332559000 | -1.306724000 | 0.005923000  |
| 1 | -2.926962000 | -1.026738000 | 0.879692000  |
| 1 | -2.210066000 | -2.388277000 | 0.023738000  |
| 1 | -2.919162000 | -1.055663000 | -0.881969000 |
| 5 | 1.111675000  | 2.560699000  | 0.004661000  |
| 1 | 0.271353000  | 3.427622000  | -0.079793000 |
| 1 | 1.891653000  | 2.626989000  | -0.929720000 |
| 1 | 1.732565000  | 2.662470000  | 1.049603000  |

---



## 7. References

- [1] R. Szlosek, M. Seidl, G. Balázs, M. Scheer, *Chem. Eur. J.* **2023**, *29*, e202301752.
- [2] N. Kuhn, G. Henkel, T. Kratz, J. Kreutzberg, R. Boese, A. H. Maulitz, *Chem. Ber.* **1993**, *126*, 2041–2045.
- [3] G. Becker, M. Rößler, *Z. Naturforsch. B* **1982**, *37*, 91–96.
- [4] F. Barth, F. Achrainer, A. M. Pütz, H. Zipse, *Chem. Eur. J.* **2017**, *23*, 13455–13464.
- [5] O. V. Dolomanov, L. J. Bourhis, R. J. Gildea, J. A. K. Howard, H. Puschmann, *J. Appl. Crystallogr.* **2009**, *42*, 339–341.
- [6] G. M. Sheldrick, *Acta Cryst. A* **2015**, *71*, 3–8.
- [7] G. M. Sheldrick, *Acta Cryst. C* **2015**, *71*, 3–8.
- [8] a) A. D. Becke, *J. Chem. Phys.* **1993**, *98*, 5648–5652; b) C. Lee, W. Yang, R. G. Parr, *Phys. Rev. B* **1988**, *37*, 785–789; c) F. Weigend, R. Ahlrichs, *Phys. Chem. Chem. Phys.* **2005**, *7*, 3297–305.
- [9] Gaussian 09, Revision E.01, M. J. Frisch, G. W. Trucks, H. B. Schlegel, G. E. Scuseria, M. A. Robb, J. R. Cheeseman, G. Scalmani, V. Barone, G. A. Petersson, H. Nakatsuji, X. Li, M. Caricato, A. Marenich, J. Bloino, B. G. Janesko, R. Gomperts, B. Mennucci, H. P. Hratchian, J. V. Ortiz, A. F. Izmaylov, J. L. Sonnenberg, D. Williams-Young, F. Ding, F. Lipparini, F. Egidi, J. Goings, B. Peng, A. Petrone, T. Henderson, D. Ranasinghe, V. G. Zakrzewski, J. Gao, N. Rega, G. Zheng, W. Liang, M. Hada, M. Ehara, K. Toyota, R. Fukuda, J. Hasegawa, M. Ishida, T. Nakajima, Y. Honda, O. Kitao, H. Nakai, T. Vreven, K. Throssell, J. A. Montgomery, Jr., J. E. Peralta, F. Ogliaro, M. Bearpark, J. J. Heyd, E. Brothers, K. N. Kudin, V. N. Staroverov, T. Keith, R. Kobayashi, J. Normand, K. Raghavachari, A. Rendell, J. C. Burant, S. S. Iyengar, J. Tomasi, M. Cossi, J. M. Millam, M. Klene, C. Adamo, R. Cammi, J. W. Ochterski, R. L. Martin, K. Morokuma, O. Farkas, J. B. Foresman, and D. J. Fox, Gaussian, Inc., Wallingford CT, 2016.
- [10] A. E. Reed, L. A. Curtiss, F. Weinhold, *Chem. Rev.* **1988**, *88*, 899–926.
- [11] Thermal Constants of Substances database, Eds. V.S. Iorish and V.S. Yungman, <https://www.chem.msu.ru/cgi-bin/tkv.pl?show=welcome.html/welcome.html>
